# Supplementary material
Source: PubMed Central journal article supplement (PMC3319351)

## **SUPPLEMENTAL MATERIAL**

### **Supplemental Methods**

#### Subjects

##### *Discovery cohort*

The University of Pennsylvania (UPenn) HDL Case-Control study (Penn-CC), is composed of subjects with extreme levels of HDL-C selected from the UPenn High HDL Cholesterol Study (HHDL) and the UPenn Catheterization cohort (PennCATH). HHDL is a cross-sectional study of genetic factors contributing to elevated HDL-C levels. Probands with elevated HDL-C (greater than the 90<sup>th</sup> percentile for age and gender) were identified by physician referrals or through the Hospital of the UPenn clinical laboratory. Relatives of HHDL probands were also invited to participate in the study. Subjects completed a lifestyle questionnaire and provided a blood sample for the measurement of HDL and other lipid-related traits. The UPenn Institutional Review Board (IRB) approved the study protocol. Over 2000 subjects have been enrolled in the HHDL study to date. PennCATH is composed of consecutive subjects undergoing coronary angiography at UPenn Health System hospitals and has been previously described <sup>1</sup>. Analytical measurements were performed on the UPenn samples as previously described <sup>2</sup>. Plasma HDL-C and triglyceride levels were measured enzymatically on a Cobas Fara II (Roche Diagnostic Systems, Somerville, NJ), using Sigma reagents (Sigma Chemical, St. Louis, MO). In this study, unrelated subjects of European ancestry with HDL > 90th percentile for age and gender were analyzed as cases (n=695) and subjects with HDL < 30th percentile for age and gender were analyzed as controls (n=1038). Subjects with elevated triglycerides (>400 mg/dl), BMI > 40 kg/m<sup>2</sup>, diagnosis of diabetes or fasting glucose > 126 mg/dl were excluded from analysis.

##### *Three Replication Cohorts*

The UPenn Replication Cohort (Penn-RC), the MONItoring of trends and determinants in Cardiovascular disease/Cooperative Health Research in the Region of Augsburg (MONICA/KORA) Augsburg study, and the Genetic Regulation of Arterial Pressure of Humans in the Community (GRAPHIC) study were used for replication analysis.

Penn-RC is composed of subjects from the UPenn Diabetes Heart Study (PDHS)<sup>3</sup>, the Study of Inherited Risk of Coronary Atherosclerosis cohort (SIRCA)<sup>4</sup>, the Philadelphia Area Metabolic Syndrome Network (PAMSyN), and a subset of subjects from PennCATH that is non-overlapping with the Penn-CC, which have previously been described. HDL-C measurements were performed as described above. Genotypes and HDL-C were available on up to 2,752 subjects. The UPenn IRB approved the study protocols and informed consent was obtained from all participants.

The MONICA/KORA Augsburg study consists of a series of independent population-based epidemiological surveys of participants living in the region of Augsburg, Southern Germany initially conducted to estimate the prevalence and distribution of cardiovascular risk factors among individuals aged 25 to 74 years as part of the World Health Organization MONICA project<sup>5</sup>. All survey participants were residents of German nationality identified through the registration office. Participants were examined in 1984/85 (S1), 1989/90 (S2) and 1994/95 (S3). Among a source population of 9,531 participants aged 35 to 74 years and with available blood samples a case-cohort design was performed including a stratified random sample of 2,225 participants<sup>6</sup>. All participants underwent standardized examinations including blood withdrawals for plasma and DNA. Genotypes and HDL-C were available on up to 1,544 MONICA/KORA participants of the random sample. HDL-C was measured by enzymatic methods (CHOD-PAP, Boehringer Mannheim, Germany). HDL-C was precipitated with phosphotungstic acid and magnesium ions.

GRAPHIC contains 2,037 white European subjects in 520 nuclear families from the general population. Families were recruited by writing to women aged 40 to 69 registered with participating family practitioners in Leicestershire, UK, inviting them and their family to take part<sup>7</sup>. Families were included if both parents were aged 40 to 60 years and two offspring > 18 years wished to participate. Study subjects had a detailed history taken and were examined by research nurses following standard operating procedures. Non-fasting blood samples were obtained for laboratory analysis. HDL-C was determined using standard enzymatic assays. Genotypes and HDL-C were available for 2020 GRAPHIC subjects. The study was approved by the Leicestershire Research Ethics Committee, and all subjects provided written informed consent.

#### Genotyping and Quality Control

Genomic DNA was extracted from leukocytes using the EZ1 DNA Blood kit (Qiagen, Valencia, CA) and the BioRobot EZ1 (Qiagen, Valencia, CA). Whole genomic DNA was checked for quality and quantity by UV spectrophotometry using a Spectramax 190 (Molecular Devices, Sunnyvale, CA).

DNA was diluted to 50 ng/ul and genotyping was performed at the Center for Applied Genomics (Children's Hospital of Pennsylvania) following manufacturer specifications for amplification and hybridization to the IBC array (HumanCVD beadchip, Illumina, CA). Penn-CC was genotyped on version 1 of the array, while the Penn-RC was genotyped on version 2. We also performed quality control measures to exclude unreliable SNPs. For the analysis reported here, we eliminated SNPs with genotype call rate < 95%, with minor allele frequency (MAF) < 1% in Penn-RC controls, or if there was a significant departure from Hardy-Weinberg equilibrium ( $P < 1 \times 10^{-6}$  in combined cases and controls). Only the 2,415 SNPs within the

candidate gene loci were analyzed. Genotypes for the MONICA/KORA and GRAPHIC replication studies were also obtained using the HumanCVD beadchip (Illumina, CA).

### Statistical analyses

For genotype calling a set of 5051 samples from multiple different studies were used to derive a customized cluster file using BeadStudio to ensure accurate genotype calling. The genotype concordance rate was > 99.99% in 22 duplicate sample pairs in Penn-CC. The overall genotype call rate across all samples was 99.6%. Quality control measures were implemented to exclude unreliable samples. First, samples were excluded if the genotype call rate was < 97.5% or if the sample showed excess or deficient heterozygosity (inbreeding coefficient  $|F| > 0.1$ ). Next, identical by descent estimation was used to assess cryptic relatedness or erroneous duplicates among participants. Multi-dimensional scaling (MDS) analysis was also performed to determine subjects that shared similar genetic ancestry (Supplementary Figure 1) using PLINK software<sup>8</sup>. Analysis was limited to subjects of genetically inferred Caucasian ancestry only. The discovery cohort analysis compared genotype frequencies in cases with elevated HDL-C (>90<sup>th</sup> percentile for age and gender) with frequencies in controls with decreased HDL-C (<30<sup>th</sup> percentile for age and gender, excluding subjects with absolute HDL-C values <20 mg/dl due to likely monogenic conditions). This analysis was carried out for each SNP and was adjusted for age and gender, with the model assuming additive inheritance. Associations with HDL-C were analyzed using multiple linear regression of HDL-C after adjustment for age and gender. All analyses were conducted using PLINK software<sup>8</sup>.

All candidate gene SNPs were tested in the replication cohorts. Each study was analyzed separately. Analysis of association in the GRAPHIC cohort was conducted using generalized estimating equations (GEE) with an exchangeable correlation structure to account

for the shared familial background. The analyses were adjusted for gender, age and age<sup>2</sup> (to account for the two generation structure of GRAPHIC population). To summarize the data a meta-analysis was implemented using the METAL software<sup>9</sup>. A *P*-value significance threshold of  $< 2.07 \times 10^{-5}$  in the meta-analysis was determined based on the conservative Bonferroni correction (0.05/2415 tests) and a *P*-value of  $< 0.05$  was specified as a suggestive association with HDL-C.

When SNPs reported in published GWAS lipid analyses were not directly genotyped on the IBC array, the bioinformatic tool SNAP<sup>10</sup> was used to identify proxy SNPs on the IBC array with  $r^2 > 0.8$ .

Conditional analyses were performed incorporating allele dosage of the most significantly associated SNP in each associated locus as a covariate to identify any additional independent SNPs associated with HDL-C. The conditional analysis was performed as a step-wise regression incorporating the highest remaining associated SNP in each associated locus as a covariate until there was no longer any evidence of association with HDL. This was performed using a less stringent cut-off based on the Bonferroni correction for the total number of candidate genes tested ( $P < 7.6 \times 10^{-4}$ , 0.05/66 genes).

## Supplemental References

1. Lehrke M, Millington SC, Lefterova M, Cumaranatunge RG, Szapary P, Wilensky R, Rader DJ, Lazar MA, Reilly MP. Cxcl16 is a marker of inflammation, atherosclerosis, and acute coronary syndromes in humans. *J Am Coll Cardiol.* 2007;49:442-449
2. Barnhart KT, Freeman E, Grisso JA, Rader DJ, Sammel M, Kapoor S, Nestler JE. The effect of dehydroepiandrosterone supplementation to symptomatic perimenopausal women on serum endocrine profiles, lipid parameters, and health-related quality of life. *J Clin Endocrinol Metab.* 1999;84:3896-3902
3. Bagheri R, Schutta M, Cumaranatunge RG, Wolfe ML, Terembula K, Hoffman B, Schwartz S, Kimmel SE, Farouk S, Iqbal N, Reilly MP. Value of electrocardiographic and ankle-brachial index abnormalities for prediction of coronary atherosclerosis in asymptomatic subjects with type 2 diabetes mellitus. *Am J Cardiol.* 2007;99:951-955
4. Valdes AM, Wolfe ML, Tate HC, Gefer W, Rut A, Rader DJ. Association of traditional risk factors with coronary calcification in persons with a family history of premature coronary heart disease: The study of the inherited risk of coronary atherosclerosis. *J Investig Med.* 2001;49:353-361
5. FB HH, A D, J S, A L, U K. Ten-year trends of cardiovascular risk factors in the monica augsburg region in southern germany. Results from 1984/1985, 1989/1990, and 1994/1995 surveys. *CVD Prevention.* 1998;1:318-327
6. Thorand B, Schneider A, Baumert J, Doring A, Marowsky-Koppl M, Heier M, Meisinger C, Lowel H. [case-cohort studies: An effective design for the investigation of biomarkers as risk factors for chronic diseases--demonstrated by the example of the monica/kora augsburg case-cohort study 1984-2002]. *Gesundheitswesen.* 2005;67 Suppl 1:S98-102
7. Tobin MD, Tomaszewski M, Braund PS, Hajat C, Raleigh SM, Palmer TM, Caulfield M, Burton PR, Samani NJ. Common variants in genes underlying monogenic hypertension

- and hypotension and blood pressure in the general population. *Hypertension*. 2008;51:1658-1664
8. Purcell S, Neale B, Todd-Brown K, Thomas L, Ferreira MA, Bender D, Maller J, Sklar P, de Bakker PI, Daly MJ, Sham PC. Plink: A tool set for whole-genome association and population-based linkage analyses. *Am J Hum Genet*. 2007;81:559-575
  9. Willer CJ, Sanna S, Jackson AU, Scuteri A, Bonnycastle LL, Clarke R, Heath SC, Timpson NJ, Najjar SS, Stringham HM, Strait J, Duren WL, Maschio A, Busonero F, Mulas A, Albai G, Swift AJ, Morken MA, Narisu N, Bennett D, Parish S, Shen H, Galan P, Meneton P, Hercberg S, Zelenika D, Chen WM, Li Y, Scott LJ, Scheet PA, Sundvall J, Watanabe RM, Nagaraja R, Ebrahim S, Lawlor DA, Ben-Shlomo Y, Davey-Smith G, Shuldiner AR, Collins R, Bergman RN, Uda M, Tuomilehto J, Cao A, Collins FS, Lakatta E, Lathrop GM, Boehnke M, Schlessinger D, Mohlke KL, Abecasis GR. Newly identified loci that influence lipid concentrations and risk of coronary artery disease. *Nat Genet*. 2008;40:161-169
  10. Johnson AD, Handsaker RE, Pulit SL, Nizzari MM, O'Donnell CJ, de Bakker PI. Snap: A web-based tool for identification and annotation of proxy snps using hapmap. *Bioinformatics*. 2008;24:2938-2939
  11. Vaisar T, Pennathur S, Green PS, Gharib SA, Hoofnagle AN, Cheung MC, Byun J, Vuletic S, Kassim S, Singh P, Chea H, Knopp RH, Brunzell J, Geary R, Chait A, Zhao XQ, Elkon K, Marcovina S, Ridker P, Oram JF, Heinecke JW. Shotgun proteomics implicates protease inhibition and complement activation in the antiinflammatory properties of hdl. *J Clin Invest*. 2007;117:746-756
  12. Curtiss LK, Valenta DT, Hime NJ, Rye KA. What is so special about apolipoprotein ai in reverse cholesterol transport? *Arterioscler Thromb Vasc Biol*. 2006;26:12-19

13. R W, D L, J H, N M. Marked reduction of high density lipoprotein cholesterol in mice genetically modified to lack apolipoprotein a-i. *Proc. Natl. Acad. Sci. USA.* 1992;89:7134-7138
14. Cohen RD, Castellani LW, Qiao JH, Van Lenten BJ, Lusis AJ, Reue K. Reduced aortic lesions and elevated high density lipoprotein levels in transgenic mice overexpressing mouse apolipoprotein a-iv. *J Clin Invest.* 1997;99:1906-1916
15. Weinstock PH, Bisgaier CL, Hayek T, Aalto-Setälä K, Sehayek E, Wu L, Sheffele P, Merkel M, Essenburg AD, Breslow JL. Decreased hdl cholesterol levels but normal lipid absorption, growth, and feeding behavior in apolipoprotein a-iv knockout mice. *J Lipid Res.* 1997;38:1782-1794
16. van der Vliet HN, Schaap FG, Levels JH, Ottenhoff R, Looije N, Wesseling JG, Groen AK, Chamuleau RA. Adenoviral overexpression of apolipoprotein a-v reduces serum levels of triglycerides and cholesterol in mice. *Biochem Biophys Res Commun.* 2002;295:1156-1159
17. Groenendijk M, Cantor RM, de Bruin TW, Dallinga-Thie GM. The apoai-ciii-aiv gene cluster. *Atherosclerosis.* 2001;157:1-11
18. Miller M, Zhan M. Genetic determinants of low high-density lipoprotein cholesterol. *Curr Opin Cardiol.* 2004;19:380-384
19. Boes E, Coassin S, Kollerits B, Heid IM, Kronenberg F. Genetic-epidemiological evidence on genes associated with hdl cholesterol levels: A systematic in-depth review. *Exp Gerontol.* 2009;44:136-160
20. Weissglas-Volkov D, Pajukanta P. Genetic causes of high and low serum hdl-cholesterol. *J Lipid Res.* 2010;51:2032-2057
21. Kathiresan S, Melander O, Guiducci C, Surti A, Burt NP, Rieder MJ, Cooper GM, Roos C, Voight BF, Havulinna AS, Wahlstrand B, Hedner T, Corella D, Tai ES, Ordovas JM, Berglund G, Vartiainen E, Jousilahti P, Hedblad B, Taskinen MR, Newton-Cheh C,



- Salomaa V, Peltonen L, Groop L, Altshuler DM, Orho-Melander M. Six new loci associated with blood low-density lipoprotein cholesterol, high-density lipoprotein cholesterol or triglycerides in humans. *Nat Genet.* 2008;40:189-197
22. Kathiresan S, Willer CJ, Peloso GM, Demissie S, Musunuru K, Schadt EE, Kaplan L, Bennett D, Li Y, Tanaka T, Voight BF, Bonnycastle LL, Jackson AU, Crawford G, Surti A, Guiducci C, Burt NP, Parish S, Clarke R, Zelenika D, Kubalanza KA, Morken MA, Scott LJ, Stringham HM, Galan P, Swift AJ, Kuusisto J, Bergman RN, Sundvall J, Laakso M, Ferrucci L, Scheet P, Sanna S, Uda M, Yang Q, Lunetta KL, Dupuis J, de Bakker PI, O'Donnell CJ, Chambers JC, Kooner JS, Hercberg S, Meneton P, Lakatta EG, Scuteri A, Schlessinger D, Tuomilehto J, Collins FS, Groop L, Altshuler D, Collins R, Lathrop GM, Melander O, Salomaa V, Peltonen L, Orho-Melander M, Ordovas JM, Boehnke M, Abecasis GR, Mohlke KL, Cupples LA. Common variants at 30 loci contribute to polygenic dyslipidemia. *Nat Genet.* 2009;41:56-65
23. Chasman DI, Pare G, Mora S, Hopewell JC, Peloso G, Clarke R, Cupples LA, Hamsten A, Kathiresan S, Malarstig A, Ordovas JM, Ripatti S, Parker AN, Miletich JP, Ridker PM. Forty-three loci associated with plasma lipoprotein size, concentration, and cholesterol content in genome-wide analysis. *PLoS Genet.* 2009;5:e1000730
24. Teslovich TM, Musunuru K, Smith AV, Edmondson AC, Stylianou IM, Koseki M, Pirruccello JP, Ripatti S, Chasman DI, Willer CJ, Johansen CT, Fouchier SW, Isaacs A, Peloso GM, Barbalic M, Ricketts SL, Bis JC, Aulchenko YS, Thorleifsson G, Feitosa MF, Chambers J, Orho-Melander M, Melander O, Johnson T, Li X, Guo X, Li M, Shin Cho Y, Jin Go M, Jin Kim Y, Lee JY, Park T, Kim K, Sim X, Twee-Hee Ong R, Croteau-Chonka DC, Lange LA, Smith JD, Song K, Hua Zhao J, Yuan X, Luan J, Lamina C, Ziegler A, Zhang W, Zee RY, Wright AF, Witteman JC, Wilson JF, Willemsen G, Wichmann HE, Whitfield JB, Waterworth DM, Wareham NJ, Waeber G, Vollenweider P, Voight BF, Vitart V, Uitterlinden AG, Uda M, Tuomilehto J, Thompson JR, Tanaka T, Surakka I,

Stringham HM, Spector TD, Soranzo N, Smit JH, Sinisalo J, Silander K, Sijbrands EJ, Scuteri A, Scott J, Schlessinger D, Sanna S, Salomaa V, Saharinen J, Sabatti C, Ruukonen A, Rudan I, Rose LM, Roberts R, Rieder M, Psaty BM, Pramstaller PP, Pichler I, Perola M, Penninx BW, Pedersen NL, Pattaro C, Parker AN, Pare G, Oostra BA, O'Donnell CJ, Nieminen MS, Nickerson DA, Montgomery GW, Meitinger T, McPherson R, McCarthy MI, McArdle W, Masson D, Martin NG, Marroni F, Mangino M, Magnusson PK, Lucas G, Luben R, Loos RJ, Lokki ML, Lettre G, Langenberg C, Launer LJ, Lakatta EG, Laaksonen R, Kyvik KO, Kronenberg F, Konig IR, Khaw KT, Kaprio J, Kaplan LM, Johansson A, Jarvelin MR, Cecile JWJA, Ingelsson E, Igl W, Kees Hovingh G, Hottenga JJ, Hofman A, Hicks AA, Hengstenberg C, Heid IM, Hayward C, Havulinna AS, Hastie ND, Harris TB, Haritunians T, Hall AS, Gyllenstein U, Guiducci C, Groop LC, Gonzalez E, Gieger C, Freimer NB, Ferrucci L, Erdmann J, Elliott P, Ejebe KG, Doring A, Dominiczak AF, Demissie S, Deloukas P, de Geus EJ, de Faire U, Crawford G, Collins FS, Chen YD, Caulfield MJ, Campbell H, Burt NP, Bonnycastle LL, Boomsma DI, Boekholdt SM, Bergman RN, Barroso I, Bandinelli S, Ballantyne CM, Assimes TL, Quertermous T, Altshuler D, Seielstad M, Wong TY, Tai ES, Feranil AB, Kuzawa CW, Adair LS, Taylor HA, Jr., Borecki IB, Gabriel SB, Wilson JG, Holm H, Thorsteinsdottir U, Gudnason V, Krauss RM, Mohlke KL, Ordovas JM, Munroe PB, Kooner JS, Tall AR, Hegele RA, Kastelein JJ, Schadt EE, Rotter JI, Boerwinkle E, Strachan DP, Mooser V, Stefansson K, Reilly MP, Samani NJ, Schunkert H, Cupples LA, Sandhu MS, Ridker PM, Rader DJ, van Duijn CM, Peltonen L, Abecasis GR, Boehnke M, Kathiresan S.

Biological, clinical and population relevance of 95 loci for blood lipids. *Nature*.

2010;466:707-713

25. Tailleux A, Duriez P, Fruchart JC, Clavey V. Apolipoprotein a-ii, hdl metabolism and atherosclerosis. *Atherosclerosis*. 2002;164:1-13

26. Weng W, Breslow JL. Dramatically decreased high density lipoprotein cholesterol, increased remnant clearance, and insulin hypersensitivity in apolipoprotein a-ii knockout mice suggest a complex role for apolipoprotein a-ii in atherosclerosis susceptibility. *Proc Natl Acad Sci U S A*. 1996;93:14788-14794
27. Su Z, Wang X, Tsaih SW, Zhang A, Cox A, Sheehan S, Paigen B. Genetic basis of hdl variation in 129/svimj and c57bl/6j mice: Importance of testing candidate genes in targeted mutant mice. *J Lipid Res*. 2009;50:116-125
28. Blanco-Vaca F, Escola-Gil JC, Martin-Campos JM, Julve J. Role of apo-a-ii in lipid metabolism and atherosclerosis: Advances in the study of an enigmatic protein. *J Lipid Res*. 2001;42:1727-1739
29. Paromov VM, Morton RE. Lipid transfer inhibitor protein defines the participation of high density lipoprotein subfractions in lipid transfer reactions mediated by cholesterol ester transfer protein (cetp). *J Biol Chem*. 2003;278:40859-40866
30. Lagor WR, Brown RJ, Toh SA, Millar JS, Fuki IV, de la Llera-Moya M, Yuen T, Rothblat G, Billheimer JT, Rader DJ. Overexpression of apolipoprotein f reduces hdl cholesterol levels in vivo. *Arterioscler Thromb Vasc Biol*. 2009;29:40-46
31. Kypreos KE, Zannis VI. Pathway of biogenesis of apolipoprotein e-containing hdl in vivo with the participation of abca1 and lcat. *Biochem J*. 2007;403:359-367
32. Brousseau ME, Schaefer EJ, Wolfe ML, Bloedon LT, Digenio AG, Clark RW, Mancuso JP, Rader DJ. Effects of an inhibitor of cholesteryl ester transfer protein on hdl cholesterol. *N Engl J Med*. 2004;350:1505-1515
33. Agellon LB, Walsh A, Hayek T, Moulin P, Jiang XC, Shelanski SA, Breslow JL, Tall AR. Reduced high density lipoprotein cholesterol in human cholesteryl ester transfer protein transgenic mice. *J Biol Chem*. 1991;266:10796-10801
34. Aulchenko YS, Ripatti S, Lindqvist I, Boomsma D, Heid IM, Pramstaller PP, Penninx BW, Janssens AC, Wilson JF, Spector T, Martin NG, Pedersen NL, Kyvik KO, Kaprio J,

- Hofman A, Freimer NB, Jarvelin MR, Gyllensten U, Campbell H, Rudan I, Johansson A, Marroni F, Hayward C, Vitart V, Jonasson I, Pataro C, Wright A, Hastie N, Pichler I, Hicks AA, Falchi M, Willemsen G, Hottenga JJ, de Geus EJ, Montgomery GW, Whitfield J, Magnusson P, Saharinen J, Perola M, Silander K, Isaacs A, Sijbrands EJ, Uitterlinden AG, Witteman JC, Oostra BA, Elliott P, Ruukonen A, Sabatti C, Gieger C, Meitinger T, Kronenberg F, Doring A, Wichmann HE, Smit JH, McCarthy MI, van Duijn CM, Peltonen L. Loci influencing lipid levels and coronary heart disease risk in 16 european population cohorts. *Nat Genet.* 2009;41:47-55
35. Heid I, Boes E, Müller M, Kollerits B, Lamina C, Coassin S, Gieger C, Döring A, Klopp N, Frikke-Schmidt R, Tybjærg-Hansen A, Brandstätter A, Luchner A, Meitinger T, Wichmann H, Kronenberg F. Genome-wide association analysis of high-density lipoprotein cholesterol in the population-based kora study sheds new light on intergenic regions. *Circ Cardiovasc Genet.* 2008;1:10-20
36. Chasman D, Paré G, Zee R, Parker A, Cook N, Buring J, Kwiatkowski D, Rose L, Smith J, Williams P, Rieder M, Rotter J, Nickerson D, Krauss R, Miletich J, Ridker P. Genetic loci associated with plasma concentration of low-density lipoprotein cholesterol, high-density lipoprotein cholesterol, triglycerides, apolipoprotein a1, and apolipoprotein b among 6382 white women in genome-wide analysis with replication *Circ Cardiovasc Genet.* 2008;1:21-30
37. Sabatti C, Service SK, Hartikainen AL, Pouta A, Ripatti S, Brodsky J, Jones CG, Zaitlen NA, Varilo T, Kaakinen M, Sovio U, Ruukonen A, Laitinen J, Jakkula E, Coin L, Hoggart C, Collins A, Turunen H, Gabriel S, Elliot P, McCarthy MI, Daly MJ, Jarvelin MR, Freimer NB, Peltonen L. Genome-wide association analysis of metabolic traits in a birth cohort from a founder population. *Nat Genet.* 2009;41:35-46
38. Sakai N, Vaisman BL, Koch CA, Hoyt RF, Jr., Meyn SM, Talley GD, Paiz JA, Brewer HB, Jr., Santamarina-Fojo S. Targeted disruption of the mouse lecithin:Cholesterol

- acyltransferase (Icat) gene. Generation of a new animal model for human Icat deficiency. *J Biol Chem.* 1997;272:7506-7510
39. Ng DS, Francone OL, Forte TM, Zhang J, Haghpassand M, Rubin EM. Disruption of the murine lecithin:Cholesterol acyltransferase gene causes impairment of adrenal lipid delivery and up-regulation of scavenger receptor class b type i. *J Biol Chem.* 1997;272:15777-15781
40. Vaisman BL, Klein HG, Rouis M, Berard AM, Kindt MR, Talley GD, Meyn SM, Hoyt RF, Jr., Marcovina SM, Albers JJ, et al. Overexpression of human lecithin cholesterol acyltransferase leads to hyperalphalipoproteinemia in transgenic mice. *J Biol Chem.* 1995;270:12269-12275
41. Francone OL, Gong EL, Ng DS, Fielding CJ, Rubin EM. Expression of human lecithin-cholesterol acyltransferase in transgenic mice. Effect of human apolipoprotein ai and human apolipoprotein all on plasma lipoprotein cholesterol metabolism. *J Clin Invest.* 1995;96:1440-1448
42. Kuivenhoven JA, Pritchard H, Hill J, Frohlich J, Assmann G, Kastelein J. The molecular pathology of lecithin:Cholesterol acyltransferase (Icat) deficiency syndromes. *J Lipid Res.* 1997;38:191-205
43. Jiang XC, Bruce C, Mar J, Lin M, Ji Y, Francone OL, Tall AR. Targeted mutation of plasma phospholipid transfer protein gene markedly reduces high-density lipoprotein levels. *J Clin Invest.* 1999;103:907-914
44. Jiang X, Francone OL, Bruce C, Milne R, Mar J, Walsh A, Breslow JL, Tall AR. Increased prebeta-high density lipoprotein, apolipoprotein ai, and phospholipid in mice expressing the human phospholipid transfer protein and human apolipoprotein ai transgenes. *J Clin Invest.* 1996;98:2373-2380
45. Foger B, Santamarina-Fojo S, Shamburek RD, Parrot CL, Talley GD, Brewer HB, Jr. Plasma phospholipid transfer protein. Adenovirus-mediated overexpression in mice

- leads to decreased plasma high density lipoprotein (hdl) and enhanced hepatic uptake of phospholipids and cholesteryl esters from hdl. *J Biol Chem.* 1997;272:27393-27400
46. Haketa A, Soma M, Nakayama T, Sato M, Kosuge K, Aoi N, Matsumoto K. Two medium-chain acyl-coenzyme a synthetase genes, sah and macs1, are associated with plasma high-density lipoprotein cholesterol levels, but they are not associated with essential hypertension. *J Hypertens.* 2004;22:1903-1907
  47. Ludwig EH, Mahley RW, Palaoglu E, Ozbayrakci S, Balestra ME, Borecki IB, Innerarity TL, Farese RV, Jr. Dgat1 promoter polymorphism associated with alterations in body mass index, high density lipoprotein levels and blood pressure in turkish women. *Clin Genet.* 2002;62:68-73
  48. Seidah NG, Khatib AM, Prat A. The proprotein convertases and their implication in sterol and/or lipid metabolism. *Biol Chem.* 2006;387:871-877
  49. Jin W, Wang X, Millar JS, Quertermous T, Rothblat GH, Glick JM, Rader DJ. Hepatic proprotein convertases modulate hdl metabolism. *Cell Metab.* 2007;6:129-136
  50. Bocharov AV, Vishnyakova TG, Baranova IN, Patterson AP, Eggerman TL. Characterization of a 95 kda high affinity human high density lipoprotein-binding protein. *Biochemistry.* 2001;40:4407-4416
  51. Applebaum-Bowden D. Lipases and lecithin: Cholesterol acyltransferase in the control of lipoprotein metabolism. *Curr Opin Lipidol.* 1995;6:130-135
  52. Busch SJ, Barnhart RL, Martin GA, Fitzgerald MC, Yates MT, Mao SJ, Thomas CE, Jackson RL. Human hepatic triglyceride lipase expression reduces high density lipoprotein and aortic cholesterol in cholesterol-fed transgenic mice. *J Biol Chem.* 1994;269:16376-16382
  53. Homanics GE, de Silva HV, Osada J, Zhang SH, Wong H, Borensztajn J, Maeda N. Mild dyslipidemia in mice following targeted inactivation of the hepatic lipase gene. *J Biol Chem.* 1995;270:2974-2980

54. Isaacs A, Sayed-Tabatabaei FA, Njajou OT, Witteman JC, van Duijn CM. The -514 c->t hepatic lipase promoter region polymorphism and plasma lipids: A meta-analysis. *J Clin Endocrinol Metab.* 2004;89:3858-3863
55. Haemmerle G, Zimmermann R, Zechner R. Letting lipids go: Hormone-sensitive lipase. *Curr Opin Lipidol.* 2003;14:289-297
56. Haemmerle G, Zimmermann R, Strauss JG, Kratky D, Riederer M, Knipping G, Zechner R. Hormone-sensitive lipase deficiency in mice changes the plasma lipid profile by affecting the tissue-specific expression pattern of lipoprotein lipase in adipose tissue and muscle. *J Biol Chem.* 2002;277:12946-12952
57. Badellino KO, Rader DJ. The role of endothelial lipase in high-density lipoprotein metabolism. *Curr Opin Cardiol.* 2004;19:392-395
58. Su Z, Ishimori N, Chen Y, Leiter EH, Churchill GA, Paigen B, Stylianou IM. Four additional mouse crosses improve the lipid qtl landscape and identify lipg as a qtl gene. *J Lipid Res.* 2009
59. Jaye M, Lynch KJ, Krawiec J, Marchadier D, Maugeais C, Doan K, South V, Amin D, Perrone M, Rader DJ. A novel endothelial-derived lipase that modulates hdl metabolism. *Nat Genet.* 1999;21:424-428
60. Hirata K, Dichek HL, Cioffi JA, Choi SY, Leeper NJ, Quintana L, Kronmal GS, Cooper AD, Quertermous T. Cloning of a unique lipase from endothelial cells extends the lipase gene family. *J Biol Chem.* 1999;274:14170-14175
61. Ishida T, Choi S, Kundu RK, Hirata K, Rubin EM, Cooper AD, Quertermous T. Endothelial lipase is a major determinant of hdl level. *J Clin Invest.* 2003;111:347-355
62. Edmondson AC, Brown RJ, Kathiresan S, Cupples LA, Demissie S, Manning AK, Jensen MK, Rimm EB, Wang J, Rodrigues A, Bamba V, Khetarpal SA, Wolfe ML, Derohannessian S, Li M, Reilly MP, Aberle J, Evans D, Hegele RA, Rader DJ. Loss-of-

function variants in endothelial lipase are a cause of elevated hdl cholesterol in humans.

*J Clin Invest.* 2009;119:1042-1050

63. Brown RJ, Edmondson AC, Griffon N, Hill TB, Fuki IV, Badellino KO, Li M, Wolfe ML, Reilly MP, Rader DJ. A naturally occurring variant of endothelial lipase associated with elevated hdl exhibits impaired synthesis. *J Lipid Res.* 2009
64. Goldberg IJ. Lipoprotein lipase and lipolysis: Central roles in lipoprotein metabolism and atherogenesis. *J Lipid Res.* 1996;37:693-707
65. Levak-Frank S, Weinstock PH, Hayek T, Verdery R, Hofmann W, Ramakrishnan R, Sattler W, Breslow JL, Zechner R. Induced mutant mice expressing lipoprotein lipase exclusively in muscle have subnormal triglycerides yet reduced high density lipoprotein cholesterol levels in plasma. *J Biol Chem.* 1997;272:17182-17190
66. Noga AA, Vance DE. A gender-specific role for phosphatidylethanolamine n-methyltransferase-derived phosphatidylcholine in the regulation of plasma high density and very low density lipoproteins in mice. *J Biol Chem.* 2003;278:21851-21859
67. Willner EL, Tow B, Buhman KK, Wilson M, Sanan DA, Rudel LL, Farese RV, Jr. Deficiency of acyl coa:Cholesterol acyltransferase 2 prevents atherosclerosis in apolipoprotein e-deficient mice. *Proc Natl Acad Sci U S A.* 2003;100:1262-1267
68. Tall AR, Yvan-Charvet L, Terasaka N, Pagler T, Wang N. Hdl, abc transporters, and cholesterol efflux: Implications for the treatment of atherosclerosis. *Cell Metab.* 2008;7:365-375
69. Aiello RJ, Brees D, Francone OL. Abca1-deficient mice: Insights into the role of monocyte lipid efflux in hdl formation and inflammation. *Arterioscler Thromb Vasc Biol.* 2003;23:972-980
70. Oram JF. Tangier disease and abca1. *Biochim Biophys Acta.* 2000;1529:321-330
71. Linsel-Nitschke P, Jehle AW, Shan J, Cao G, Bacic D, Lan D, Wang N, Tall AR. Potential role of abca7 in cellular lipid efflux to apo-a-i. *J Lipid Res.* 2005;46:86-92



72. Kim WS, Fitzgerald ML, Kang K, Okuhira K, Bell SA, Manning JJ, Koehn SL, Lu N, Moore KJ, Freeman MW. Abca7 null mice retain normal macrophage phosphatidylcholine and cholesterol efflux activity despite alterations in adipose mass and serum cholesterol levels. *J Biol Chem.* 2005;280:3989-3995
73. Wang N, Lan D, Chen W, Matsuura F, Tall AR. Atp-binding cassette transporters g1 and g4 mediate cellular cholesterol efflux to high-density lipoproteins. *Proc Natl Acad Sci U S A.* 2004;101:9774-9779
74. Wiersma H, Nijstad N, de Boer JF, Out R, Hogewerf W, Van Berkel TJ, Kuipers F, Tietge UJ. Lack of abcg1 results in decreased plasma hdl cholesterol levels and increased biliary cholesterol secretion in mice fed a high cholesterol diet. *Atherosclerosis.* 2009
75. Kennedy MA, Barrera GC, Nakamura K, Baldan A, Tarr P, Fishbein MC, Frank J, Francone OL, Edwards PA. Abcg1 has a critical role in mediating cholesterol efflux to hdl and preventing cellular lipid accumulation. *Cell Metab.* 2005;1:121-131
76. Yu L, Li-Hawkins J, Hammer RE, Berge KE, Horton JD, Cohen JC, Hobbs HH. Overexpression of abcg5 and abcg8 promotes biliary cholesterol secretion and reduces fractional absorption of dietary cholesterol. *J Clin Invest.* 2002;110:671-680
77. Yu L, Hammer RE, Li-Hawkins J, Von Bergmann K, Lutjohann D, Cohen JC, Hobbs HH. Disruption of abcg5 and abcg8 in mice reveals their crucial role in biliary cholesterol secretion. *Proc Natl Acad Sci U S A.* 2002;99:16237-16242
78. Martinez LO, Jacquet S, Esteve JP, Rolland C, Cabezon E, Champagne E, Pineau T, Georgeaud V, Walker JE, Terce F, Collet X, Perret B, Barbaras R. Ectopic beta-chain of atp synthase is an apolipoprotein a-i receptor in hepatic hdl endocytosis. *Nature.* 2003;421:75-79
79. von Eckardstein A, Rohrer L. Transendothelial lipoprotein transport and regulation of endothelial permeability and integrity by lipoproteins. *Curr Opin Lipidol.* 2009;20:197-205

80. Le Lay S, Kurzchalia TV. Getting rid of caveolins: Phenotypes of caveolin-deficient animals. *Biochim Biophys Acta*. 2005;1746:322-333
81. Kozyraki R, Fyfe J, Kristiansen M, Gerdes C, Jacobsen C, Cui S, Christensen EI, Aminoff M, de la Chapelle A, Krahe R, Verroust PJ, Moestrup SK. The intrinsic factor-vitamin b12 receptor, cubilin, is a high-affinity apolipoprotein a-i receptor facilitating endocytosis of high-density lipoprotein. *Nat Med*. 1999;5:656-661
82. Hammad SM, Barth JL, Knaak C, Argraves WS. Megalin acts in concert with cubilin to mediate endocytosis of high density lipoproteins. *J Biol Chem*. 2000;275:12003-12008
83. Gu L, Johnson MW, Lusis AJ. Quantitative trait locus analysis of plasma lipoprotein levels in an autoimmune mouse model : Interactions between lipoprotein metabolism, autoimmune disease, and atherogenesis. *Arterioscler Thromb Vasc Biol*. 1999;19:442-453
84. Tunaru S, Kero J, Schaub A, Wufka C, Blaukat A, Pfeffer K, Offermanns S. Puma-g and hm74 are receptors for nicotinic acid and mediate its anti-lipolytic effect. *Nat Med*. 2003;9:352-355
85. Xia YR, Klisak I, Sparkes RS, Oram J, Lusis AJ. Localization of the gene for high-density lipoprotein binding protein (hdlbp) to human chromosome 2q37. *Genomics*. 1993;16:524-525
86. Jacquet S, Malaval C, Martinez LO, Sak K, Rolland C, Perez C, Nauze M, Champagne E, Terce F, Gachet C, Perret B, Collet X, Boeynaems JM, Barbaras R. The nucleotide receptor p2y13 is a key regulator of hepatic high-density lipoprotein (hdl) endocytosis. *Cell Mol Life Sci*. 2005;62:2508-2515
87. Kocher O, Krieger M. Role of the adaptor protein pdzk1 in controlling the hdl receptor sr-bi. *Curr Opin Lipidol*. 2009;20:236-241
88. Kocher O, Yesilaltay A, Cirovic C, Pal R, Rigotti A, Krieger M. Targeted disruption of the pdzk1 gene in mice causes tissue-specific depletion of the high density lipoprotein

- receptor scavenger receptor class b type i and altered lipoprotein metabolism. *J Biol Chem.* 2003;278:52820-52825
89. Silver DL, Wang N, Vogel S. Identification of small pdzk1-associated protein, dd96/map17, as a regulator of pdzk1 and plasma high density lipoprotein levels. *J Biol Chem.* 2003;278:28528-28532
90. Acton S, Rigotti A, Landschulz KT, Xu S, Hobbs HH, Krieger M. Identification of scavenger receptor sr-bi as a high density lipoprotein receptor. *Science.* 1996;271:518-520
91. Trigatti BL, Krieger M, Rigotti A. Influence of the hdl receptor sr-bi on lipoprotein metabolism and atherosclerosis. *Arterioscler Thromb Vasc Biol.* 2003;23:1732-1738
92. Stylianou IM, Svenson KL, VanOrman SK, Langle Y, Millar JS, Paigen B, Rader DJ. Novel enu-induced point mutation in scavenger receptor class b, member 1, results in liver specific loss of scarb1 protein. *PLoS One.* 2009;4:e6521
93. Morishima A, Ohkubo N, Maeda N, Miki T, Mitsuda N. Nfkappab regulates plasma apolipoprotein a-i and high density lipoprotein cholesterol through inhibition of peroxisome proliferator-activated receptor alpha. *J Biol Chem.* 2003;278:38188-38193
94. Peters JM, Hennuyer N, Staels B, Fruchart JC, Fievet C, Gonzalez FJ, Auwerx J. Alterations in lipoprotein metabolism in peroxisome proliferator-activated receptor alpha-deficient mice. *J Biol Chem.* 1997;272:27307-27312
95. Shih DQ, Bussen M, Sehayek E, Ananthanarayanan M, Shneider BL, Suchy FJ, Shefer S, Bollileni JS, Gonzalez FJ, Breslow JL, Stoffel M. Hepatocyte nuclear factor-1alpha is an essential regulator of bile acid and plasma cholesterol metabolism. *Nat Genet.* 2001;27:375-382
96. Babaya N, Ikegami H, Kawaguchi Y, Fujisawa T, Nakagawa Y, Hamada Y, Hotta M, Ueda H, Shintani M, Nojima K, Kawabata Y, Ono M, Yamada K, Shen GQ, Fukuda M,

Ogihara T. Hepatocyte nuclear factor-1alpha gene and non-insulin-dependent diabetes mellitus in the japanese population. *Acta Diabetol.* 1998;35:150-153

97. Hayhurst GP, Lee YH, Lambert G, Ward JM, Gonzalez FJ. Hepatocyte nuclear factor 4alpha (nuclear receptor 2a1) is essential for maintenance of hepatic gene expression and lipid homeostasis. *Mol Cell Biol.* 2001;21:1393-1403

| Supplemental Table 1. HDL candidate genes |            |                    |                |                                                                                                                      |
|-------------------------------------------|------------|--------------------|----------------|----------------------------------------------------------------------------------------------------------------------|
| Locus                                     | Chromosome | IBC Array Priority | Number of SNPs | Evidence                                                                                                             |
| <b>HDL-associated apolipoproteins</b>     |            |                    |                |                                                                                                                      |
| <i>APOA1/APOA4/APOA5/APOC3</i>            | 11q23-q24  | 1                  | 62             | biology <sup>11, 12</sup> , mouse <sup>13-16</sup> , human <sup>14, 17-20</sup> , GWAS <sup>21-24</sup>              |
| <i>APOA2</i>                              | 1q21-q23   | 1                  | 18             | biology <sup>11, 25</sup> , mouse <sup>26-28</sup> , human <sup>20</sup>                                             |
| <i>APOD</i>                               | 3q29       | 1                  | 13             | biology <sup>11</sup>                                                                                                |
| <i>APOF</i>                               | 12q13.3    | 2                  | 10             | biology <sup>11, 29</sup> , mouse <sup>30</sup>                                                                      |
| <i>APOE/APOC1/APOC2</i>                   | 19q13.32   | 1                  | 57             | biology <sup>11</sup> , mouse <sup>31</sup> , human <sup>19, 20</sup> , GWAS <sup>23, 24</sup>                       |
| <b>HDL-associated enzymes</b>             |            |                    |                |                                                                                                                      |
| <i>CETP</i>                               | 16q13      | 1                  | 97             | biology <sup>11, 32</sup> , mouse <sup>33</sup> , human <sup>19, 20</sup> , GWAS <sup>9, 21-24, 34-37</sup>          |
| <i>LCAT</i>                               | 16q22.1    | 1                  | 15             | biology <sup>11</sup> , mouse <sup>38-41</sup> , human <sup>14, 18-20, 42</sup> , GWAS <sup>22, 24, 37</sup>         |
| <i>PAFAH1B1</i>                           | 17p13.3    | 2                  | 13             | biology <sup>11</sup>                                                                                                |
| <i>PAFAH1B2</i>                           | 11q23.3    | 1                  | 8              | biology <sup>11</sup>                                                                                                |
| <i>PAFAH1B3</i>                           | 19q13.2    | 2                  | 5              | biology <sup>11</sup>                                                                                                |
| <i>PLTP</i>                               | 20q13.12   | 1                  | 31             | biology <sup>11</sup> , mouse <sup>43-45</sup> , GWAS <sup>22-24</sup>                                               |
| <i>PON1/PON2/PON3/PON4</i>                | 7q21.3     | 1                  | 165            | biology <sup>11</sup> , human <sup>19, 20</sup>                                                                      |
| <b>Plasma and cell-associated enzymes</b> |            |                    |                |                                                                                                                      |
| <i>ACSM1</i>                              | 16p12.3    | 2                  | 13             | human <sup>46</sup>                                                                                                  |
| <i>ACSM2</i>                              | 16p13.11   | 2                  | 12             | human <sup>46</sup>                                                                                                  |
| <i>DGAT1</i>                              | 8q24.3     | 1                  | 7              | human <sup>19, 47</sup>                                                                                              |
| <i>FURIN</i>                              | 15q26.1    | 1                  | 13             | biology <sup>48, 49</sup>                                                                                            |
| <i>HSP90B1</i>                            | 12q24.2    | 2                  | 18             | biology <sup>50</sup>                                                                                                |
| <i>LIPC</i>                               | 15q21.3    | 1                  | 177            | biology <sup>51</sup> , mouse <sup>52, 53</sup> , human <sup>19, 20, 54</sup> , GWAS <sup>9, 21-24, 34, 36, 37</sup> |
| <i>LIPE</i>                               | 19q13.2    | 1                  | 43             | biology <sup>55</sup> , mouse <sup>56</sup>                                                                          |
| <i>LIPG</i>                               | 18q21.1    | 1                  | 42             | biology <sup>57</sup> , mouse <sup>58-61</sup> , human <sup>19, 20, 62, 63</sup> , GWAS <sup>9, 21-24, 34, 35</sup>  |
| <i>LPL</i>                                | 8p21.3     | 1                  | 75             | biology <sup>64</sup> , mouse <sup>65</sup> , human <sup>14, 18-20</sup> , GWAS <sup>9, 21-24, 34, 35</sup>          |

|              |          |   |     |                           |
|--------------|----------|---|-----|---------------------------|
| <i>PCSK5</i> | 9q21.3   | 2 | 178 | biology <sup>48, 49</sup> |
| <i>PCSK6</i> | 15q26.3  | 1 | 224 | biology <sup>48, 49</sup> |
| <i>PEMT</i>  | 17p11.2  | 2 | 26  | mouse <sup>66</sup>       |
| <i>SOAT1</i> | 1q25.2   | 1 | 30  | biology                   |
| <i>SOAT2</i> | 12q13.13 | 1 | 24  | mouse <sup>67</sup>       |

### Cell receptors and transporters

|                              |           |   |     |                                                                                                                |
|------------------------------|-----------|---|-----|----------------------------------------------------------------------------------------------------------------|
| <i>ABCA1</i>                 | 9q22-q31  | 1 | 141 | biology <sup>68</sup> , mouse <sup>69</sup> , human <sup>14, 18-20, 70</sup> ,<br>GWAS <sup>9, 21-24, 34</sup> |
| <i>ABCA7</i>                 | 19p13.3   | 1 | 12  | biology <sup>71</sup> , mouse <sup>72</sup>                                                                    |
| <i>ABCB11</i>                | 2q24      | 2 | 53  | biology                                                                                                        |
| <i>ABCB4</i>                 | 7q21.1    | 2 | 20  | biology                                                                                                        |
| <i>ABCD1</i>                 | 14q32.3   | 2 | 7   | biology                                                                                                        |
| <i>ABCG1</i>                 | 21q22.3   | 1 | 69  | biology <sup>68, 73</sup> , mouse <sup>74, 75</sup>                                                            |
| <i>ABCG4</i>                 | 11q23.3   | 1 | 12  | biology <sup>73</sup>                                                                                          |
| <i>ABCG5</i>                 | 2p21      | 1 | 35  | mouse <sup>76, 77</sup> , human <sup>20, 76</sup> , GWAS                                                       |
| <i>ABCG8</i>                 | 2p21      | 2 | 22  | mouse <sup>76, 77</sup> , human <sup>20, 76</sup> , GWAS                                                       |
| <i>ATP5B</i>                 | 12q13.13  | 2 | 7   | biology <sup>78</sup>                                                                                          |
| <i>CAV1/CAV2</i>             | 7q31.1    | 1 | 29  | biology <sup>79</sup> , mouse <sup>80</sup>                                                                    |
| <i>CD36</i>                  | 7q11.2    | 1 | 118 | biology, human <sup>19</sup>                                                                                   |
| <i>CUBN</i>                  | 10p12.31  | 2 | 150 | biology <sup>81, 82</sup>                                                                                      |
| <i>FAS</i>                   | 10q24.1   | 1 | 89  | mouse <sup>83</sup>                                                                                            |
| <i>GPR109A/GPR109B/GPR81</i> | 12q24.31  | 1 | 30  | biology <sup>84</sup>                                                                                          |
| <i>HDLBP</i>                 | 2q37      | 1 | 43  | biology <sup>50, 85</sup>                                                                                      |
| <i>LRP1</i>                  | 12q13-q14 | 1 | 96  | biology                                                                                                        |
| <i>LRP2</i>                  | 2q24-q31  | 2 | 102 | biology <sup>82</sup>                                                                                          |
| <i>P2RY13/PSRY14</i>         | 3q24      | 1 | 11  | biology <sup>86</sup>                                                                                          |
| <i>PDZK1</i>                 | 1q21      | 1 | 9   | biology <sup>87</sup> , mouse <sup>88</sup>                                                                    |
| <i>PDZK1IP1</i>              | 1p33      | 2 | 12  | mouse <sup>89</sup>                                                                                            |
| <i>NR5A2</i>                 | 1q32.1    | 2 | 65  | biology                                                                                                        |
| <i>SCARB1</i>                | 12q24.31  | 1 | 74  | biology <sup>90</sup> , mouse <sup>91, 92</sup> , human <sup>19, 20</sup> ,<br>GWAS <sup>24</sup>              |

**Transcription Factors**

|                     |                       |   |     |                                           |
|---------------------|-----------------------|---|-----|-------------------------------------------|
| <i>NFKB1</i>        | 4q24                  | 1 | 122 | mouse <sup>93</sup>                       |
| <i>NR1H2</i> (LXRB) | 19q13.3               | 1 | 12  | biology, human <sup>19</sup>              |
| <i>NR1H3</i> (LXRA) | 11p11.2               | 1 | 7   | GWAS <sup>37</sup>                        |
| <i>PPARA</i>        | 22q12-q13.1; 22q13.31 | 1 | 104 | mouse <sup>94</sup> , human <sup>19</sup> |
| <i>PPARD</i>        | 6p21.2-p21.1          | 1 | 93  | biology                                   |
| <i>PPARG</i>        | 3p25                  | 1 | 101 | biology                                   |
| <i>RXRA</i>         | 9q34.3                | 1 | 133 | biology                                   |
| <i>RXRB</i>         | 6p21.3                | 2 | 5   | biology                                   |
| <i>TCF1</i>         | 12q24.2               | 2 | 13  | mouse <sup>95</sup> , human <sup>96</sup> |

**GWAS validated locus**

|                          |              |   |     |                                              |
|--------------------------|--------------|---|-----|----------------------------------------------|
| <i>ANGPTL3</i>           | 1p31.1-p22.3 | 1 | 9   | biology <sup>49</sup>                        |
| <i>ANGPTL4</i>           | 19p13.3      | 1 | 7   | GWAS <sup>22, 24</sup>                       |
| <i>APOB</i>              | 2p24         | 1 | 107 | GWAS <sup>20, 24, 34</sup>                   |
| <i>FADS1/FADS2/FADS3</i> | 11q12-q13.1  | 1 | 30  | GWAS <sup>22, 24</sup>                       |
| <i>GALNT2</i>            | 1q41-q42     | 0 | 2   | GWAS <sup>9, 21, 22, 24</sup>                |
| <i>HNF4A</i>             | 20q12-q13.1  | 1 | 67  | mouse <sup>97</sup> , GWAS <sup>22, 24</sup> |
| <i>MMAB/MVK</i>          | 12q24        | 2 | 10  | GWAS <sup>9, 22, 24</sup>                    |
| <i>TRIB1</i>             | 8q24.13      | 0 | 4   | GWAS <sup>24</sup>                           |

Supplemental Table 2. Penn-CC Discovery Cohort SNPs with Suggestive Evidence of Association

|             |            |    |    |      | Penn-CC |          |      | Penn-RC |          |      | MONICA/KORA |          |      | GRAPHIC |          |      | Combined Replication Cohort |          |      |
|-------------|------------|----|----|------|---------|----------|------|---------|----------|------|-------------|----------|------|---------|----------|------|-----------------------------|----------|------|
| Locus       | SNP        | A1 | A2 | MAF  | T       | P        | N    | T       | P        | N    | T           | P        | N    | Z       | P        | N    | Z                           | P        | N    |
| <i>CETP</i> | rs1800775  | A  | C  | 0.45 | 7.70    | 1.45E-16 | 1600 | 5.63    | 2.04E-08 | 2693 | 5.82        | 7.14E-09 | 1536 | 6.57    | 4.95E-11 | 2020 | 10.29                       | 7.99E-25 | 6249 |
| <i>CETP</i> | rs17231506 | A  | G  | 0.28 | 7.57    | 1.89E-16 | 1600 | 6.25    | 4.68E-10 | 2691 | 6.84        | 1.12E-11 | 1536 | 7.83    | 5.00E-15 | 2020 | 11.91                       | 1.10E-32 | 6247 |
| <i>CETP</i> | rs3764261  | A  | C  | 0.28 | 7.47    | 3.55E-16 | 1600 | 6.15    | 8.94E-10 | 2693 | 6.93        | 6.36E-12 | 1542 | 7.83    | 4.77E-15 | 2019 | 11.88                       | 1.45E-32 | 6254 |
| <i>CETP</i> | rs711752   | A  | G  | 0.38 | 7.75    | 5.35E-16 | 1600 | 4.23    | 2.44E-05 | 2693 | 5.84        | 6.25E-09 | 1539 | 6.69    | 2.30E-11 | 2019 | 9.45                        | 3.30E-21 | 6251 |
| <i>CETP</i> | rs708272   | A  | G  | 0.38 | 7.75    | 5.35E-16 | 1600 | 4.23    | 2.44E-05 | 2693 | 5.84        | 6.28E-09 | 1540 | 6.67    | 2.52E-11 | 2020 | 9.45                        | 3.55E-21 | 6253 |
| <i>CETP</i> | rs1864163  | A  | G  | 0.30 | -7.68   | 1.19E-15 | 1598 | -4.68   | 3.05E-06 | 2692 | -6.37       | 2.48E-10 | 1541 | -5.68   | 1.32E-08 | 2020 | -9.43                       | 3.93E-21 | 6253 |
| <i>CETP</i> | rs11076175 | G  | A  | 0.22 | -7.81   | 2.07E-15 | 1597 | -5.62   | 2.10E-08 | 2692 | -5.05       | 5.07E-07 | 1538 | -5.06   | 4.26E-07 | 2018 | -9.05                       | 1.50E-19 | 6248 |
| <i>CETP</i> | rs7499892  | A  | G  | 0.22 | -7.77   | 3.50E-15 | 1600 | -5.73   | 1.10E-08 | 2693 | -5.21       | 2.18E-07 | 1542 | -5.17   | 2.36E-07 | 2018 | -9.26                       | 2.04E-20 | 6253 |
| <i>CETP</i> | rs11508026 | A  | G  | 0.39 | 7.46    | 3.95E-15 | 1600 | 4.07    | 4.93E-05 | 2690 | 5.76        | 1.00E-08 | 1534 | 6.61    | 3.80E-11 | 2020 | 9.27                        | 1.95E-20 | 6244 |
| <i>CETP</i> | rs1532624  | A  | C  | 0.39 | 7.35    | 5.12E-15 | 1600 | 4.13    | 3.68E-05 | 2693 | 6.17        | 8.81E-10 | 1543 | 7.01    | 2.43E-12 | 2020 | 9.73                        | 2.17E-22 | 6256 |
| <i>CETP</i> | rs1532625  | A  | G  | 0.39 | 7.36    | 6.89E-15 | 1549 | 4.14    | 3.65E-05 | 2605 | 5.90        | 4.38E-09 | 1506 | 7.14    | 9.45E-13 | 2017 | 9.70                        | 3.11E-22 | 6128 |
| <i>CETP</i> | rs12720922 | A  | G  | 0.22 | -7.52   | 1.55E-14 | 1600 | -5.76   | 9.57E-09 | 2693 | -5.36       | 9.56E-08 | 1540 | -5.25   | 1.50E-07 | 2019 | -9.40                       | 5.53E-21 | 6252 |
| <i>CETP</i> | rs7203984  | C  | A  | 0.23 | -7.52   | 3.64E-14 | 1600 | -5.48   | 4.74E-08 | 2693 | -4.90       | 1.08E-06 | 1539 | -4.73   | 2.25E-06 | 2019 | -8.69                       | 3.56E-18 | 6251 |
| <i>CETP</i> | rs9939224  | A  | C  | 0.25 | -7.40   | 1.74E-13 | 1600 | -5.66   | 1.65E-08 | 2693 | -4.94       | 8.66E-07 | 1541 | -3.97   | 7.27E-05 | 2020 | -8.40                       | 4.42E-17 | 6254 |
| <i>CETP</i> | rs11076176 | C  | A  | 0.21 | -6.33   | 4.90E-10 | 1599 | -4.68   | 2.98E-06 | 2692 | -4.74       | 2.34E-06 | 1537 | -5.08   | 3.79E-07 | 2019 | -8.30                       | 1.08E-16 | 6248 |
| <i>CETP</i> | rs289714   | G  | A  | 0.21 | -6.28   | 9.94E-10 | 1600 | -4.71   | 2.57E-06 | 2693 | -4.12       | 3.92E-05 | 1540 | -4.72   | 2.35E-06 | 2019 | -7.81                       | 5.74E-15 | 6252 |
| <i>CETP</i> | rs4783961  | A  | G  | 0.48 | 4.52    | 5.07E-07 | 1600 | 3.76    | 1.72E-04 | 2691 | 2.78        | 5.44E-03 | 1537 | 3.43    | 6.03E-04 | 2020 | 5.80                        | 6.85E-09 | 6248 |
| <i>LPL</i>  | rs3208305  | T  | A  | 0.27 | 4.87    | 6.33E-07 | 1593 | 3.19    | 1.42E-03 | 2675 | 2.27        | 2.31E-02 | 1530 | 2.99    | 2.77E-03 | 2019 | 4.92                        | 8.55E-07 | 6224 |



|              |            |   |   |      |       |          |      |       |          |      |       |          |      |        |          |      |       |          |      |
|--------------|------------|---|---|------|-------|----------|------|-------|----------|------|-------|----------|------|--------|----------|------|-------|----------|------|
| LPL          | rs13702    | G | A | 0.28 | 4.85  | 7.37E-07 | 1599 | 3.16  | 1.58E-03 | 2693 | 2.26  | 2.43E-02 | 1543 | 3.01   | 2.62E-03 | 2020 | 4.90  | 9.52E-07 | 6256 |
| CETP         | rs12720889 | A | T | 0.28 | 4.68  | 1.17E-06 | 1596 | -0.12 | 9.01E-01 | 2683 | 2.42  | 1.58E-02 | 1486 | 2.85   | 4.40E-03 | 2017 | 2.73  | 6.39E-03 | 6186 |
| CETP         | rs289743   | G | A | 0.28 | 4.47  | 2.58E-06 | 1585 | -0.46 | 6.43E-01 | 2593 | 3.12  | 1.84E-03 | 1519 | 3.05   | 2.33E-03 | 2016 | 3.00  | 2.73E-03 | 6128 |
| CETP         | rs289718   | G | A | 0.29 | 4.40  | 3.25E-06 | 1598 | -0.19 | 8.50E-01 | 2689 | 2.88  | 4.01E-03 | 1536 | 2.93   | 3.38E-03 | 2017 | 2.97  | 2.98E-03 | 6242 |
| CETP         | rs289719   | A | G | 0.29 | 4.38  | 3.66E-06 | 1599 | -0.26 | 7.95E-01 | 2693 | 2.95  | 3.22E-03 | 1539 | 2.93   | 3.42E-03 | 2018 | 2.95  | 3.13E-03 | 6250 |
| CETP         | rs289716   | T | A | 0.29 | 4.32  | 5.16E-06 | 1600 | -0.27 | 7.86E-01 | 2693 | 2.67  | 7.70E-03 | 1537 | 2.85   | 4.40E-03 | 2020 | 2.76  | 5.73E-03 | 6250 |
| LPL          | rs263      | A | G | 0.17 | 4.25  | 7.68E-06 | 1600 | 3.15  | 1.67E-03 | 2693 | 2.67  | 7.62E-03 | 1541 | 3.01   | 2.62E-03 | 2020 | 5.10  | 3.45E-07 | 6254 |
| CETP         | rs6499863  | A | G | 0.18 | -4.37 | 9.05E-06 | 1600 | -0.81 | 4.16E-01 | 2693 | -3.00 | 2.74E-03 | 1542 | -1.55  | 1.21E-01 | 2020 | -2.90 | 3.72E-03 | 6255 |
| LIPG         | rs2156552  | A | T | 0.18 | -4.07 | 1.43E-05 | 1600 | -2.30 | 2.16E-02 | 2693 | -0.95 | 3.40E-01 | 1543 | -3.37  | 7.48E-04 | 2020 | -3.90 | 9.76E-05 | 6256 |
| LPL          | rs328      | G | C | 0.08 | 4.27  | 1.45E-05 | 1600 | 3.20  | 1.42E-03 | 2693 | 2.91  | 3.62E-03 | 1544 | 3.14   | 1.68E-03 | 2020 | 5.32  | 1.02E-07 | 6257 |
| LIPG         | rs1943981  | T | A | 0.18 | -4.10 | 1.50E-05 | 1600 | -2.32 | 2.04E-02 | 2693 | -0.87 | 3.86E-01 | 1544 | -3.37  | 7.63E-04 | 2020 | -3.86 | 1.12E-04 | 6257 |
| CETP         | rs5882     | G | A | 0.30 | 4.11  | 1.59E-05 | 1600 | 0.09  | 9.24E-01 | 2693 | 2.94  | 3.36E-03 | 1543 | 3.10   | 1.95E-03 | 2019 | 3.28  | 1.04E-03 | 6255 |
| CETP         | rs11076174 | G | A | 0.11 | -4.49 | 1.88E-05 | 1600 | -2.37 | 1.80E-02 | 2693 | -1.46 | 1.44E-01 | 1543 | 0.35   | 7.30E-01 | 2020 | -2.08 | 3.74E-02 | 6256 |
| LPL          | rs301      | G | A | 0.21 | 4.27  | 2.54E-05 | 1597 | 3.67  | 2.43E-04 | 2693 | 1.26  | 2.07E-01 | 1541 | 3.06   | 2.21E-03 | 2019 | 4.77  | 1.81E-06 | 6253 |
| CETP         | rs4784745  | G | A | 0.35 | -3.74 | 2.68E-05 | 1600 | -0.16 | 8.76E-01 | 2693 | -2.13 | 3.36E-02 | 1544 | -5.09  | 3.53E-07 | 2019 | -4.05 | 5.11E-05 | 6256 |
| LPL          | rs12679834 | G | A | 0.08 | 4.15  | 2.71E-05 | 1598 | 3.12  | 1.83E-03 | 2691 | 3.08  | 2.10E-03 | 1538 | 3.22   | 1.28E-03 | 2013 | 5.40  | 6.61E-08 | 6242 |
| CETP         | rs6499861  | G | C | 0.17 | -4.11 | 3.39E-05 | 1600 | -0.58 | 5.64E-01 | 2693 | -2.81 | 4.99E-03 | 1543 | -1.73  | 8.43E-02 | 2020 | -2.75 | 5.89E-03 | 6256 |
| LPL          | rs268      | G | A | 0.02 | -3.48 | 4.83E-05 | 1600 | -1.69 | 9.17E-02 | 2693 | -3.95 | 8.30E-05 | 1543 | -0.49  | 6.23E-01 | 2019 | -3.34 | 8.36E-04 | 6255 |
| RXRA         | rs35738419 | A | G | 0.02 | -3.30 | 4.88E-05 | 1573 | -0.19 | 8.52E-01 | 2564 | -0.57 | 5.69E-01 | 1499 | -19.41 | 0.00E+00 | 2020 | -0.50 | 6.21E-01 | 4063 |
| GPR109A/B/81 | rs2256572  | A | G | 0.45 | -4.19 | 5.44E-05 | 1597 | -0.79 | 4.31E-01 | 2690 | 1.75  | 7.97E-02 | 1531 | -0.16  | 8.72E-01 | 2020 | 0.26  | 7.96E-01 | 6241 |
| CETP         | rs5883     | A | G | 0.05 | 3.92  | 6.00E-05 | 1600 | 2.49  | 1.29E-02 | 2693 | -0.70 | 4.87E-01 | 1531 | 1.02   | 3.07E-01 | 2019 | 1.87  | 6.14E-02 | 6243 |

|                     |            |   |   |      |       |          |      |       |          |      |       |          |      |       |          |      |       |          |      |
|---------------------|------------|---|---|------|-------|----------|------|-------|----------|------|-------|----------|------|-------|----------|------|-------|----------|------|
| <i>GPR109A/B/81</i> | rs1798192  | A | C | 0.45 | -4.16 | 6.18E-05 | 1594 | -0.79 | 4.29E-01 | 2685 | 1.83  | 6.79E-02 | 1527 | -0.20 | 8.42E-01 | 2016 | 0.27  | 7.86E-01 | 6228 |
| <i>GPR109A/B/81</i> | rs3858543  | A | G | 0.39 | -4.06 | 6.97E-05 | 1594 | -0.04 | 9.71E-01 | 2687 | 1.13  | 2.57E-01 | 1524 | -0.23 | 8.19E-01 | 2018 | -0.41 | 6.84E-01 | 6229 |
| <i>LPL</i>          | rs3735964  | A | C | 0.09 | 3.97  | 7.00E-05 | 1600 | 2.97  | 3.02E-03 | 2693 | 2.09  | 3.69E-02 | 1543 | 3.34  | 8.40E-04 | 2019 | 4.88  | 1.06E-06 | 6255 |
| <i>LPL</i>          | rs3779788  | A | G | 0.13 | 4.03  | 7.34E-05 | 1600 | 2.78  | 5.45E-03 | 2693 | 2.91  | 3.65E-03 | 1543 | 2.83  | 4.67E-03 | 2020 | 4.88  | 1.09E-06 | 6256 |
| <i>CETP</i>         | rs289717   | A | G | 0.35 | -3.48 | 7.40E-05 | 1600 | -0.02 | 9.88E-01 | 2693 | -1.94 | 5.21E-02 | 1537 | -4.92 | 8.69E-07 | 2020 | -3.77 | 1.63E-04 | 6250 |
| <i>CETP</i>         | rs4784744  | A | G | 0.35 | -3.44 | 8.48E-05 | 1600 | -0.10 | 9.20E-01 | 2693 | -2.10 | 3.60E-02 | 1544 | -5.11 | 3.25E-07 | 2020 | -4.01 | 6.08E-05 | 6257 |
| <i>CETP</i>         | rs291044   | A | G | 0.35 | -3.37 | 1.15E-04 | 1600 | -0.08 | 9.39E-01 | 2693 | -1.91 | 5.64E-02 | 1542 | -5.02 | 5.25E-07 | 2020 | -3.85 | 1.19E-04 | 6255 |
| <i>SCARB1</i>       | rs10773105 | G | A | 0.47 | 3.92  | 1.24E-04 | 1599 | 0.67  | 5.02E-01 | 2693 | -0.45 | 6.52E-01 | 1534 | 0.93  | 3.54E-01 | 2020 | 0.75  | 4.56E-01 | 6247 |
| <i>SCARB1</i>       | rs865716   | A | T | 0.48 | 3.90  | 1.59E-04 | 1600 | 0.90  | 3.67E-01 | 2688 | 0.79  | 4.32E-01 | 1531 | 0.36  | 7.20E-01 | 2020 | 1.19  | 2.36E-01 | 6239 |
| <i>LPL</i>          | rs3916027  | A | G | 0.24 | 3.79  | 1.94E-04 | 1596 | 3.26  | 1.13E-03 | 2692 | 2.03  | 4.30E-02 | 1533 | 3.32  | 9.11E-04 | 2012 | 5.03  | 4.99E-07 | 6237 |
| <i>LPL</i>          | rs264      | A | G | 0.13 | 3.57  | 2.28E-04 | 1599 | 3.54  | 4.13E-04 | 2691 | 2.73  | 6.39E-03 | 1543 | 3.63  | 2.87E-04 | 2019 | 5.73  | 9.89E-09 | 6253 |
| <i>LPL</i>          | rs331      | A | G | 0.24 | 3.70  | 2.94E-04 | 1600 | 3.28  | 1.04E-03 | 2693 | 2.01  | 4.48E-02 | 1539 | 3.41  | 6.45E-04 | 2020 | 5.09  | 3.64E-07 | 6252 |
| <i>LPL</i>          | rs256      | A | G | 0.13 | 3.49  | 2.98E-04 | 1600 | 3.32  | 8.98E-04 | 2693 | 2.88  | 3.99E-03 | 1543 | 3.63  | 2.82E-04 | 2020 | 5.67  | 1.41E-08 | 6256 |
| <i>FADS1/2/3</i>    | rs174577   | A | C | 0.38 | -3.61 | 3.27E-04 | 1520 | -2.36 | 1.85E-02 | 2633 | -1.05 | 2.92E-01 | 1364 | -2.76 | 5.78E-03 | 2020 | -3.66 | 2.54E-04 | 6017 |
| <i>CETP</i>         | rs9923854  | C | A | 0.09 | 3.54  | 3.49E-04 | 1600 | 1.52  | 1.28E-01 | 2692 | -1.21 | 2.26E-01 | 1540 | -0.02 | 9.81E-01 | 2019 | -0.39 | 7.00E-01 | 6251 |
| <i>PCSK5</i>        | rs7031971  | G | A | 0.45 | -3.50 | 3.77E-04 | 1600 | -2.21 | 2.71E-02 | 2693 | 0.03  | 9.76E-01 | 1544 | -0.07 | 9.47E-01 | 2019 | -1.47 | 1.41E-01 | 6256 |
| <i>APOE/C1/C2</i>   | rs12721046 | A | G | 0.16 | -3.65 | 4.78E-04 | 1597 | -3.65 | 2.63E-04 | 2676 | -1.36 | 1.75E-01 | 1522 | -1.28 | 2.00E-01 | 2019 | -3.80 | 1.48E-04 | 6217 |
| <i>CETP</i>         | rs12708967 | G | A | 0.21 | -3.42 | 4.86E-04 | 1600 | -2.63 | 8.60E-03 | 2687 | -4.42 | 1.07E-05 | 1544 | -5.02 | 5.19E-07 | 2019 | -6.76 | 1.35E-11 | 6250 |
| <i>CETP</i>         | rs12597002 | A | C | 0.31 | -2.87 | 4.94E-04 | 1600 | -1.34 | 1.80E-01 | 2693 | -1.69 | 9.18E-02 | 1544 | -3.49 | 4.80E-04 | 2020 | -3.70 | 2.15E-04 | 6257 |
| <i>CUBN</i>         | rs17139747 | G | A | 0.04 | -3.33 | 5.16E-04 | 1600 | 0.36  | 7.20E-01 | 2693 | 1.57  | 1.16E-01 | 1544 | -1.14 | 2.53E-01 | 2020 | 0.37  | 7.13E-01 | 6257 |
| <i>LRP2</i>         | rs2673162  | A | G | 0.05 | 3.14  | 5.25E-04 | 1599 | -0.57 | 5.67E-01 | 2693 | -1.53 | 1.27E-01 | 1544 | 1.37  | 1.72E-01 | 2020 | -0.36 | 7.22E-01 | 6257 |

|                   |            |   |   |      |       |          |      |       |          |      |       |          |      |       |          |      |       |          |      |
|-------------------|------------|---|---|------|-------|----------|------|-------|----------|------|-------|----------|------|-------|----------|------|-------|----------|------|
| <i>CETP</i>       | rs1801706  | A | G | 0.17 | 3.36  | 5.80E-04 | 1600 | -0.50 | 6.20E-01 | 2693 | 0.67  | 5.06E-01 | 1544 | 1.32  | 1.87E-01 | 2019 | 0.76  | 4.50E-01 | 6256 |
| <i>SCARB1</i>     | rs12819677 | A | G | 0.48 | -3.45 | 5.91E-04 | 1600 | -0.99 | 3.22E-01 | 2693 | 0.93  | 3.51E-01 | 1538 | -0.85 | 3.96E-01 | 2019 | -0.67 | 5.03E-01 | 6250 |
| <i>LPL</i>        | rs271      | A | G | 0.14 | 3.28  | 6.86E-04 | 1600 | 2.99  | 2.83E-03 | 2693 | 2.29  | 2.21E-02 | 1541 | 3.36  | 7.88E-04 | 2018 | 5.00  | 5.63E-07 | 6252 |
| <i>LPL</i>        | rs320      | C | A | 0.26 | 3.44  | 7.94E-04 | 1596 | 3.41  | 6.67E-04 | 2690 | 1.63  | 1.03E-01 | 1530 | 3.18  | 1.49E-03 | 2019 | 4.85  | 1.24E-06 | 6239 |
| <i>ABCA1</i>      | rs10991405 | C | G | 0.07 | 3.15  | 8.04E-04 | 1600 | -1.33 | 1.84E-01 | 2693 | 0.02  | 9.84E-01 | 1544 | -1.56 | 1.19E-01 | 2020 | -1.75 | 8.02E-02 | 6257 |
| <i>ABCA1</i>      | rs12336969 | A | C | 0.07 | 3.15  | 8.04E-04 | 1600 | -1.31 | 1.91E-01 | 2693 | 0.02  | 9.84E-01 | 1544 | -1.43 | 1.52E-01 | 2020 | -1.66 | 9.68E-02 | 6257 |
| <i>APOB</i>       | rs676210   | A | G | 0.20 | 3.07  | 9.21E-04 | 1600 | 0.76  | 4.47E-01 | 2693 | 1.73  | 8.37E-02 | 1543 | 0.98  | 3.26E-01 | 2020 | 1.92  | 5.53E-02 | 6256 |
| <i>LPL</i>        | rs255      | G | A | 0.14 | 3.21  | 9.35E-04 | 1600 | 3.42  | 6.48E-04 | 2693 | 2.10  | 3.57E-02 | 1542 | 3.27  | 1.06E-03 | 2020 | 5.14  | 2.73E-07 | 6255 |
| <i>ABCA1</i>      | rs12341993 | A | C | 0.14 | -3.22 | 9.49E-04 | 1600 | -0.08 | 9.37E-01 | 2693 | -0.94 | 3.48E-01 | 1543 | -1.31 | 1.91E-01 | 2020 | -1.26 | 2.07E-01 | 6256 |
| <i>APOB</i>       | rs673548   | A | G | 0.20 | 3.04  | 9.68E-04 | 1599 | 0.78  | 4.35E-01 | 2693 | 1.72  | 8.61E-02 | 1544 | 1.00  | 3.19E-01 | 2020 | 1.93  | 5.34E-02 | 6257 |
| <i>FADS1/2/3</i>  | rs174601   | A | G | 0.38 | -3.35 | 1.05E-03 | 1599 | -2.12 | 3.44E-02 | 2689 | -0.80 | 4.26E-01 | 1543 | -2.68 | 7.34E-03 | 2020 | -3.31 | 9.43E-04 | 6252 |
| <i>NFKB1</i>      | rs230510   | A | T | 0.47 | -3.12 | 1.07E-03 | 1599 | 0.01  | 9.91E-01 | 2693 | -0.15 | 8.84E-01 | 1543 | -0.51 | 6.10E-01 | 2018 | -0.35 | 7.23E-01 | 6254 |
| <i>ABCA1</i>      | rs10991412 | A | G | 0.06 | 3.06  | 1.09E-03 | 1600 | -1.31 | 1.91E-01 | 2693 | 0.19  | 8.48E-01 | 1544 | -1.31 | 1.92E-01 | 2020 | -1.51 | 1.32E-01 | 6257 |
| <i>NFKB1</i>      | rs1585214  | A | G | 0.47 | -3.12 | 1.16E-03 | 1600 | 0.11  | 9.09E-01 | 2693 | -0.19 | 8.53E-01 | 1542 | -0.57 | 5.69E-01 | 2018 | -0.34 | 7.33E-01 | 6253 |
| <i>ABCA1</i>      | rs4100654  | G | A | 0.11 | -3.04 | 1.17E-03 | 1599 | -0.93 | 3.52E-01 | 2692 | -2.04 | 4.13E-02 | 1543 | -0.83 | 4.08E-01 | 2020 | -2.10 | 3.62E-02 | 6255 |
| <i>LPL</i>        | rs327      | C | A | 0.26 | 3.24  | 1.18E-03 | 1599 | 3.49  | 4.94E-04 | 2681 | 1.69  | 9.22E-02 | 1525 | 3.25  | 1.16E-03 | 2020 | 4.97  | 6.70E-07 | 6226 |
| <i>CETP</i>       | rs708273   | A | G | 0.30 | -2.60 | 1.29E-03 | 1599 | -1.40 | 1.63E-01 | 2693 | -1.34 | 1.79E-01 | 1394 | -3.52 | 4.24E-04 | 2019 | -3.60 | 3.24E-04 | 6106 |
| <i>NFKB1</i>      | rs1598856  | A | G | 0.48 | -3.05 | 1.44E-03 | 1600 | 0.04  | 9.65E-01 | 2693 | -0.01 | 9.94E-01 | 1544 | -0.64 | 5.21E-01 | 2020 | -0.34 | 7.34E-01 | 6257 |
| <i>CETP</i>       | rs1800777  | A | G | 0.04 | -2.92 | 1.50E-03 | 1599 | -3.65 | 2.68E-04 | 2692 | -4.28 | 2.00E-05 | 1541 | -2.38 | 1.74E-02 | 2020 | -5.86 | 4.62E-09 | 6253 |
| <i>LPL</i>        | rs1534649  | A | C | 0.38 | 3.31  | 1.51E-03 | 1594 | 1.33  | 1.83E-01 | 2578 | 1.16  | 2.48E-01 | 1532 | 1.63  | 1.03E-01 | 2019 | 2.38  | 1.75E-02 | 6129 |
| <i>PON1/2/3/4</i> | rs17884000 | G | A | 0.21 | -3.30 | 1.52E-03 | 1595 | -1.03 | 3.03E-01 | 2669 | 1.32  | 1.89E-01 | 1505 | 0.65  | 5.13E-01 | 2016 | -0.35 | 7.30E-01 | 6190 |

|                   |            |   |   |      |       |          |      |       |          |      |       |          |      |       |          |      |       |          |      |
|-------------------|------------|---|---|------|-------|----------|------|-------|----------|------|-------|----------|------|-------|----------|------|-------|----------|------|
| <i>FADS1/2/3</i>  | rs1535     | G | A | 0.35 | -3.21 | 1.57E-03 | 1600 | -2.78 | 5.41E-03 | 2693 | -0.81 | 4.18E-01 | 1537 | -2.92 | 3.49E-03 | 2020 | -3.89 | 1.01E-04 | 6250 |
| <i>APOB</i>       | rs2678379  | A | G | 0.20 | 2.89  | 1.62E-03 | 1600 | 0.70  | 4.86E-01 | 2693 | 1.70  | 8.99E-02 | 1544 | 1.03  | 3.04E-01 | 2020 | 1.88  | 5.96E-02 | 6257 |
| <i>SORCS1</i>     | rs7897974  | A | G | 0.47 | 2.80  | 1.68E-03 | 1600 | 0.79  | 4.31E-01 | 2691 | 1.13  | 2.60E-01 | 1542 | -0.13 | 8.93E-01 | 2020 | 1.15  | 2.49E-01 | 6253 |
| <i>LPL</i>        | rs329      | G | A | 0.03 | 2.82  | 1.71E-03 | 1600 | 0.01  | 9.90E-01 | 2693 | 0.87  | 3.83E-01 | 1544 | -0.55 | 5.80E-01 | 2019 | -0.13 | 8.99E-01 | 6256 |
| <i>LPL</i>        | rs28445964 | G | A | 0.02 | -2.82 | 1.78E-03 | 1600 | -1.51 | 1.32E-01 | 2693 | -1.03 | 3.04E-01 | 1543 | -2.18 | 2.94E-02 | 2020 | -2.74 | 6.22E-03 | 6256 |
| <i>PON1/2/3/4</i> | rs2299267  | G | A | 0.19 | -3.26 | 1.91E-03 | 1600 | -2.01 | 4.46E-02 | 2693 | 1.40  | 1.60E-01 | 1543 | 0.21  | 8.34E-01 | 2020 | -0.50 | 6.16E-01 | 6256 |
| <i>LPL</i>        | rs343      | A | C | 0.08 | 3.18  | 1.92E-03 | 1595 | 2.19  | 2.90E-02 | 2683 | 1.58  | 1.14E-01 | 1538 | 2.54  | 1.11E-02 | 2019 | 3.66  | 2.52E-04 | 6240 |
| <i>LPL</i>        | rs10104051 | A | G | 0.37 | 3.20  | 2.20E-03 | 1598 | 1.44  | 1.51E-01 | 2689 | 1.65  | 9.91E-02 | 1540 | 1.80  | 7.11E-02 | 2020 | 2.79  | 5.32E-03 | 6249 |
| <i>LPL</i>        | rs7009128  | G | A | 0.02 | -2.73 | 2.36E-03 | 1600 | -1.83 | 6.68E-02 | 2693 | -1.01 | 3.13E-01 | 1543 | -2.24 | 2.49E-02 | 2020 | -2.98 | 2.89E-03 | 6256 |
| <i>LPL</i>        | rs28645722 | A | G | 0.02 | -2.73 | 2.36E-03 | 1600 | -1.45 | 1.47E-01 | 2693 | -1.28 | 2.01E-01 | 1504 | -2.24 | 2.52E-02 | 2019 | -2.86 | 4.25E-03 | 6216 |
| <i>LPL</i>        | rs1470186  | G | A | 0.02 | -2.73 | 2.36E-03 | 1600 | -1.65 | 9.82E-02 | 2693 | -1.01 | 3.11E-01 | 1544 | -2.18 | 2.96E-02 | 2019 | -2.82 | 4.74E-03 | 6256 |
| <i>LPL</i>        | rs6999612  | G | A | 0.02 | -2.74 | 2.36E-03 | 1600 | -1.40 | 1.63E-01 | 2693 | -1.32 | 1.86E-01 | 1543 | -2.18 | 2.94E-02 | 2020 | -2.81 | 4.94E-03 | 6256 |
| <i>LPL</i>        | rs17091742 | A | G | 0.02 | -2.73 | 2.36E-03 | 1600 | -1.60 | 1.11E-01 | 2693 | -1.03 | 3.02E-01 | 1544 | -2.17 | 2.96E-02 | 2020 | -2.80 | 5.19E-03 | 6257 |
| <i>LPL</i>        | rs28615996 | G | A | 0.02 | -2.73 | 2.36E-03 | 1600 | -1.53 | 1.26E-01 | 2693 | -1.03 | 3.02E-01 | 1544 | -2.18 | 2.94E-02 | 2020 | -2.76 | 5.87E-03 | 6257 |
| <i>LPL</i>        | rs7000460  | C | A | 0.02 | -2.73 | 2.36E-03 | 1600 | -1.45 | 1.47E-01 | 2693 | -1.01 | 3.13E-01 | 1542 | -2.18 | 2.94E-02 | 2019 | -2.69 | 7.15E-03 | 6254 |
| <i>LIPC</i>       | rs11635491 | A | G | 0.25 | 2.72  | 2.69E-03 | 1596 | 1.43  | 1.53E-01 | 2688 | 2.83  | 4.73E-03 | 1524 | 2.22  | 2.67E-02 | 2011 | 3.60  | 3.23E-04 | 6223 |
| <i>APOB</i>       | rs1042034  | G | A | 0.20 | 2.72  | 2.90E-03 | 1600 | 0.74  | 4.61E-01 | 2692 | 1.73  | 8.43E-02 | 1542 | 0.95  | 3.40E-01 | 2020 | 1.88  | 5.97E-02 | 6254 |
| <i>LPL</i>        | rs28575919 | C | G | 0.02 | -2.67 | 3.12E-03 | 1600 | -1.59 | 1.12E-01 | 2693 | -1.17 | 2.43E-01 | 1544 | -2.18 | 2.94E-02 | 2020 | -2.86 | 4.25E-03 | 6257 |
| <i>LPL</i>        | rs7016529  | G | A | 0.02 | -2.67 | 3.12E-03 | 1600 | -1.59 | 1.12E-01 | 2693 | -1.01 | 3.13E-01 | 1543 | -2.18 | 2.94E-02 | 2020 | -2.78 | 5.43E-03 | 6256 |
| <i>PON1/2/3/4</i> | rs10259688 | G | A | 0.18 | -3.16 | 3.28E-03 | 1599 | -0.86 | 3.90E-01 | 2693 | 1.67  | 9.55E-02 | 1544 | 0.92  | 3.59E-01 | 2018 | 0.79  | 4.32E-01 | 6255 |
| <i>APOB</i>       | rs1801695  | A | G | 0.03 | 2.87  | 3.39E-03 | 1600 | 2.72  | 6.59E-03 | 2693 | 0.50  | 6.14E-01 | 1544 | 1.65  | 9.80E-02 | 2020 | 2.97  | 2.95E-03 | 6257 |

|                  |            |   |   |      |       |          |      |       |          |      |       |          |      |       |          |      |       |          |      |
|------------------|------------|---|---|------|-------|----------|------|-------|----------|------|-------|----------|------|-------|----------|------|-------|----------|------|
| <i>LIPC</i>      | rs4774297  | C | A | 0.44 | 2.57  | 3.41E-03 | 1600 | 1.47  | 1.43E-01 | 2693 | 0.57  | 5.66E-01 | 1539 | 1.78  | 7.51E-02 | 2020 | 2.26  | 2.39E-02 | 6252 |
| <i>FADS1/2/3</i> | rs174576   | A | C | 0.35 | -2.99 | 3.61E-03 | 1600 | -2.44 | 1.48E-02 | 2693 | -0.59 | 5.58E-01 | 1544 | -2.76 | 5.78E-03 | 2020 | -3.46 | 5.45E-04 | 6257 |
| <i>CETP</i>      | rs9930761  | G | A | 0.06 | 2.85  | 3.76E-03 | 1600 | 1.68  | 9.34E-02 | 2693 | -0.49 | 6.25E-01 | 1539 | -0.42 | 6.77E-01 | 2018 | 0.62  | 5.34E-01 | 6250 |
| <i>LIPC</i>      | rs8035006  | A | T | 0.31 | 2.68  | 3.78E-03 | 1600 | 0.03  | 9.78E-01 | 2693 | 2.17  | 3.02E-02 | 1544 | -1.48 | 1.39E-01 | 2019 | 0.25  | 8.00E-01 | 6256 |
| <i>NFKB1</i>     | rs17033015 | A | C | 0.45 | -2.78 | 4.12E-03 | 1557 | -0.65 | 5.14E-01 | 2654 | -0.52 | 6.04E-01 | 1167 | -0.23 | 8.16E-01 | 2018 | -0.81 | 4.18E-01 | 5839 |
| <i>LIPC</i>      | rs572410   | C | G | 0.22 | 2.92  | 4.14E-03 | 1600 | 1.12  | 2.62E-01 | 2693 | 1.43  | 1.52E-01 | 1542 | 1.06  | 2.88E-01 | 2020 | 2.05  | 4.02E-02 | 6255 |
| <i>PLTP</i>      | rs6073950  | T | A | 0.34 | 2.53  | 4.29E-03 | 1553 | 2.06  | 3.91E-02 | 2529 | -0.60 | 5.51E-01 | 1416 | 0.29  | 7.68E-01 | 1995 | 1.23  | 2.20E-01 | 5940 |
| <i>ABCA1</i>     | rs3780543  | G | A | 0.12 | 2.59  | 4.55E-03 | 1600 | 1.49  | 1.36E-01 | 2683 | 1.32  | 1.87E-01 | 1526 | 0.02  | 9.84E-01 | 2019 | 1.64  | 1.00E-01 | 6228 |
| <i>NFKB1</i>     | rs3774968  | A | G | 0.46 | -2.72 | 4.76E-03 | 1600 | -0.09 | 9.31E-01 | 2693 | -0.23 | 8.22E-01 | 1542 | -0.69 | 4.89E-01 | 2019 | -0.56 | 5.75E-01 | 6254 |
| <i>FADS1/2/3</i> | rs2072114  | G | A | 0.14 | -2.87 | 4.89E-03 | 1600 | -1.79 | 7.36E-02 | 2693 | -1.37 | 1.70E-01 | 1537 | -2.09 | 3.67E-02 | 2020 | -3.04 | 2.35E-03 | 6250 |
| <i>CETP</i>      | rs736274   | T | A | 0.10 | 2.65  | 4.92E-03 | 1600 | 0.01  | 9.94E-01 | 2691 | 2.83  | 4.68E-03 | 1542 | 2.88  | 4.04E-03 | 2020 | 3.04  | 2.34E-03 | 6253 |
| <i>ABCG8</i>     | rs17606027 | G | A | 0.13 | 2.67  | 4.96E-03 | 1600 | 0.25  | 8.03E-01 | 2693 | -0.90 | 3.70E-01 | 1542 | -0.30 | 7.60E-01 | 2020 | -0.46 | 6.49E-01 | 6255 |
| <i>SCARB1</i>    | rs4765180  | A | G | 0.44 | 2.53  | 5.04E-03 | 1596 | 1.27  | 2.05E-01 | 2691 | 0.80  | 4.25E-01 | 1541 | 0.26  | 7.93E-01 | 2015 | 1.38  | 1.69E-01 | 6247 |
| <i>PCSK5</i>     | rs10869668 | G | C | 0.22 | -2.88 | 5.05E-03 | 1596 | -0.59 | 5.53E-01 | 2688 | 0.17  | 8.64E-01 | 1540 | 0.39  | 6.96E-01 | 2016 | -0.08 | 9.35E-01 | 6244 |
| <i>FADS1/2/3</i> | rs174548   | C | G | 0.31 | -2.91 | 5.28E-03 | 1600 | -1.86 | 6.32E-02 | 2692 | 0.01  | 9.92E-01 | 1542 | -2.92 | 3.50E-03 | 2019 | -2.87 | 4.07E-03 | 6253 |
| <i>FADS1/2/3</i> | rs174570   | A | G | 0.14 | -2.95 | 5.35E-03 | 1600 | -2.92 | 3.52E-03 | 2693 | -2.65 | 8.16E-03 | 1543 | -1.41 | 1.58E-01 | 2020 | -4.03 | 5.55E-05 | 6256 |
| <i>LIPC</i>      | rs8033940  | A | G | 0.28 | 2.51  | 5.65E-03 | 1598 | 1.43  | 1.53E-01 | 2690 | 3.61  | 3.20E-04 | 1543 | 2.16  | 3.11E-02 | 2020 | 3.95  | 7.80E-05 | 6253 |
| <i>NFKB1</i>     | rs7674640  | G | A | 0.51 | -2.57 | 5.68E-03 | 1571 | 0.71  | 4.77E-01 | 2582 | -1.05 | 2.93E-01 | 1462 | -0.36 | 7.16E-01 | 2013 | -0.26 | 7.93E-01 | 6057 |
| <i>CUBN</i>      | rs12411446 | G | A | 0.04 | -2.72 | 5.68E-03 | 1600 | 0.04  | 9.70E-01 | 2693 | 0.92  | 3.57E-01 | 1543 | -1.35 | 1.77E-01 | 2018 | -0.28 | 7.76E-01 | 6254 |
| <i>CETP</i>      | rs5880     | C | G | 0.05 | -2.53 | 5.78E-03 | 1600 | -4.15 | 3.50E-05 | 2693 | -4.18 | 3.04E-05 | 1544 | -2.22 | 2.67E-02 | 2020 | -6.05 | 1.49E-09 | 6257 |
| <i>LRP1</i>      | rs1799986  | A | G | 0.14 | 2.50  | 5.81E-03 | 1600 | 1.85  | 6.52E-02 | 2685 | -0.81 | 4.16E-01 | 1540 | -0.63 | 5.30E-01 | 2019 | 0.45  | 6.54E-01 | 6244 |

|                       |            |   |   |      |       |          |      |       |          |      |       |          |      |       |          |      |       |          |      |
|-----------------------|------------|---|---|------|-------|----------|------|-------|----------|------|-------|----------|------|-------|----------|------|-------|----------|------|
| <i>PON1/2/3/4</i>     | rs17884563 | T | A | 0.11 | -3.10 | 5.81E-03 | 1600 | -0.89 | 3.73E-01 | 2670 | -0.30 | 7.66E-01 | 1544 | 1.12  | 2.61E-01 | 2020 | 0.09  | 9.27E-01 | 6234 |
| <i>ABCA1</i>          | rs12235875 | G | A | 0.05 | 2.48  | 5.86E-03 | 1600 | 0.56  | 5.72E-01 | 2682 | 0.90  | 3.67E-01 | 1537 | 1.40  | 1.61E-01 | 2019 | 1.62  | 1.06E-01 | 6238 |
| <i>RXRA</i>           | rs35123561 | A | G | 0.08 | -2.69 | 5.86E-03 | 1600 | -0.25 | 8.01E-01 | 2693 | 0.02  | 9.86E-01 | 1544 | 0.67  | 5.03E-01 | 2020 | 0.23  | 8.22E-01 | 6257 |
| <i>LIPC</i>           | rs8034802  | A | T | 0.27 | 2.51  | 5.94E-03 | 1599 | 1.20  | 2.30E-01 | 2692 | 3.33  | 8.78E-04 | 1541 | 2.31  | 2.07E-02 | 2017 | 3.75  | 1.74E-04 | 6250 |
| <i>LPL</i>            | rs1800590  | C | A | 0.03 | -2.44 | 5.97E-03 | 1600 | -0.83 | 4.04E-01 | 2692 | -1.31 | 1.92E-01 | 1544 | -2.25 | 2.47E-02 | 2019 | -2.47 | 1.34E-02 | 6255 |
| <i>LPL</i>            | rs1031045  | A | G | 0.03 | -2.44 | 5.97E-03 | 1600 | -0.59 | 5.56E-01 | 2693 | -1.25 | 2.11E-01 | 1544 | -2.18 | 2.94E-02 | 2020 | -2.25 | 2.48E-02 | 6257 |
| <i>LIPG</i>           | rs12966382 | A | G | 0.14 | 2.59  | 6.04E-03 | 1600 | 0.11  | 9.09E-01 | 2693 | 0.06  | 9.49E-01 | 1542 | 2.41  | 1.59E-02 | 2018 | 1.48  | 1.40E-01 | 6253 |
| <i>CETP</i>           | rs12720918 | G | A | 0.30 | -2.64 | 6.13E-03 | 1599 | -3.56 | 3.74E-04 | 2693 | -3.77 | 1.69E-04 | 1543 | -4.68 | 2.86E-06 | 2020 | -6.86 | 6.81E-12 | 6256 |
| <i>APOA1/A4/A5/C3</i> | rs12285095 | C | A | 0.08 | -2.85 | 7.15E-03 | 1600 | -2.04 | 4.14E-02 | 2693 | -1.42 | 1.56E-01 | 1544 | -1.61 | 1.08E-01 | 2020 | -2.96 | 3.10E-03 | 6257 |
| <i>PLTP</i>           | rs6065904  | A | G | 0.22 | -2.33 | 7.21E-03 | 1599 | -0.29 | 7.72E-01 | 2693 | 0.14  | 8.90E-01 | 1542 | -1.88 | 5.97E-02 | 2020 | -1.19 | 2.33E-01 | 6255 |
| <i>FADS1/2/3</i>      | rs2524299  | T | A | 0.13 | -2.74 | 7.34E-03 | 1598 | -1.29 | 1.98E-01 | 2691 | -1.40 | 1.61E-01 | 1542 | -2.03 | 4.24E-02 | 2019 | -2.69 | 7.07E-03 | 6252 |
| <i>FADS1/2/3</i>      | rs174535   | G | A | 0.35 | -2.76 | 7.38E-03 | 1598 | -2.33 | 2.01E-02 | 2693 | -0.92 | 3.56E-01 | 1542 | -3.00 | 2.73E-03 | 2020 | -3.69 | 2.28E-04 | 6255 |
| <i>SOAT1</i>          | rs2255375  | G | A | 0.16 | 2.88  | 7.39E-03 | 1600 | 1.25  | 2.12E-01 | 2693 | 0.16  | 8.74E-01 | 1543 | -0.76 | 4.46E-01 | 2020 | 0.47  | 6.42E-01 | 6256 |
| <i>NFKB1</i>          | rs230528   | C | A | 0.36 | 2.57  | 7.70E-03 | 1573 | 1.38  | 1.66E-01 | 2664 | 0.26  | 7.94E-01 | 1417 | 1.91  | 5.62E-02 | 2018 | 2.14  | 3.25E-02 | 6099 |
| <i>CETP</i>           | rs289742   | C | G | 0.11 | 2.48  | 7.77E-03 | 1600 | 0.13  | 9.01E-01 | 2692 | 3.44  | 5.93E-04 | 1543 | 2.74  | 6.05E-03 | 2020 | 3.35  | 8.15E-04 | 6255 |
| <i>APOA1/A4/A5/C3</i> | rs12287066 | A | C | 0.08 | -2.81 | 8.34E-03 | 1600 | -2.05 | 4.03E-02 | 2691 | -1.61 | 1.07E-01 | 1540 | -1.65 | 9.89E-02 | 2019 | -3.08 | 2.04E-03 | 6250 |
| <i>CUBN</i>           | rs12416115 | G | A | 0.04 | -2.59 | 8.45E-03 | 1600 | 0.26  | 7.95E-01 | 2693 | 0.92  | 3.57E-01 | 1543 | -1.44 | 1.49E-01 | 2018 | -0.19 | 8.49E-01 | 6254 |
| <i>ABCA1</i>          | rs1883025  | A | G | 0.29 | -2.45 | 8.51E-03 | 1599 | -1.37 | 1.71E-01 | 2693 | -0.85 | 3.94E-01 | 1544 | -2.62 | 8.86E-03 | 2020 | -2.81 | 4.98E-03 | 6257 |
| <i>LIPC</i>           | rs4775065  | A | G | 0.23 | 2.36  | 8.55E-03 | 1600 | -0.39 | 7.00E-01 | 2692 | -1.03 | 3.04E-01 | 1543 | 1.57  | 1.17E-01 | 2019 | 0.13  | 8.99E-01 | 6254 |
| <i>PLTP</i>           | rs4810479  | G | A | 0.26 | -2.14 | 8.64E-03 | 1599 | -0.16 | 8.73E-01 | 2693 | 0.47  | 6.39E-01 | 1543 | -2.48 | 1.33E-02 | 2018 | -1.28 | 2.01E-01 | 6254 |
| <i>SCARB1</i>         | rs4379922  | G | A | 0.34 | 2.41  | 8.96E-03 | 1600 | 1.62  | 1.06E-01 | 2693 | 1.20  | 2.31E-01 | 1543 | 0.31  | 7.54E-01 | 2019 | 1.83  | 6.66E-02 | 6255 |

|                     |            |   |   |      |       |          |      |       |          |      |       |          |      |       |          |      |       |          |      |
|---------------------|------------|---|---|------|-------|----------|------|-------|----------|------|-------|----------|------|-------|----------|------|-------|----------|------|
| <i>PDZK1IP1</i>     | rs12760654 | A | G | 0.22 | -2.47 | 9.23E-03 | 1600 | -0.57 | 5.70E-01 | 2693 | 0.35  | 7.27E-01 | 1539 | -0.25 | 7.99E-01 | 2019 | -0.34 | 7.31E-01 | 6251 |
| <i>CETP</i>         | rs12447924 | G | A | 0.24 | -2.13 | 9.24E-03 | 1597 | -2.25 | 2.48E-02 | 2684 | -0.72 | 4.69E-01 | 1538 | -2.78 | 5.39E-03 | 2020 | -3.42 | 6.39E-04 | 6242 |
| <i>PON1/2/3/4</i>   | rs17880030 | A | G | 0.20 | -2.67 | 9.27E-03 | 1599 | -0.42 | 6.73E-01 | 2689 | 1.29  | 1.99E-01 | 1542 | 0.89  | 3.74E-01 | 2020 | 0.87  | 3.87E-01 | 6251 |
| <i>NFKB1</i>        | rs3774964  | G | A | 0.33 | 2.62  | 9.38E-03 | 1600 | 2.03  | 4.30E-02 | 2693 | -0.06 | 9.55E-01 | 1539 | 2.05  | 4.00E-02 | 2020 | 2.47  | 1.36E-02 | 6252 |
| <i>LIPC</i>         | rs1869144  | G | A | 0.37 | 2.34  | 9.48E-03 | 1600 | -0.08 | 9.33E-01 | 2693 | -0.54 | 5.91E-01 | 1541 | 0.29  | 7.71E-01 | 2019 | -0.16 | 8.76E-01 | 6253 |
| <i>GPR109A/B/81</i> | rs3922628  | T | A | 0.20 | 2.61  | 9.59E-03 | 1597 | 1.13  | 2.58E-01 | 2684 | 0.56  | 5.73E-01 | 1434 | 3.12  | 1.81E-03 | 2017 | 2.81  | 4.95E-03 | 6135 |
| <i>LIPC</i>         | rs2070895  | A | G | 0.20 | 2.60  | 9.84E-03 | 1600 | 1.56  | 1.18E-01 | 2693 | 3.48  | 5.16E-04 | 1541 | 2.43  | 1.50E-02 | 2020 | 4.13  | 3.59E-05 | 6254 |
| <i>LPL</i>          | rs1121923  | A | G | 0.04 | 2.26  | 1.01E-02 | 1600 | -0.12 | 9.02E-01 | 2691 | 0.13  | 8.97E-01 | 1544 | -1.16 | 2.47E-01 | 2019 | -0.67 | 5.01E-01 | 6254 |
| <i>PON1/2/3/4</i>   | rs17881071 | A | G | 0.20 | -2.63 | 1.02E-02 | 1600 | -0.54 | 5.89E-01 | 2691 | 1.47  | 1.43E-01 | 1541 | 1.06  | 2.89E-01 | 2020 | 0.98  | 3.30E-01 | 6252 |
| <i>LIPC</i>         | rs261332   | A | G | 0.18 | 2.61  | 1.02E-02 | 1600 | 1.33  | 1.82E-01 | 2692 | 3.54  | 4.16E-04 | 1544 | 2.47  | 1.34E-02 | 2019 | 4.03  | 5.50E-05 | 6255 |
| <i>LPL</i>          | rs285      | A | G | 0.43 | 2.45  | 1.03E-02 | 1600 | 1.52  | 1.29E-01 | 2692 | 1.84  | 6.67E-02 | 1542 | 1.11  | 2.69E-01 | 2020 | 2.53  | 1.13E-02 | 6254 |
| <i>PAFAH1B2</i>     | rs4938349  | G | A | 0.23 | 2.69  | 1.06E-02 | 1599 | 2.11  | 3.47E-02 | 2693 | -0.68 | 4.98E-01 | 1539 | -0.19 | 8.51E-01 | 2020 | 0.94  | 3.46E-01 | 6252 |
| <i>LIPC</i>         | rs4775067  | A | C | 0.23 | 2.28  | 1.09E-02 | 1595 | -0.25 | 8.01E-01 | 2623 | -1.00 | 3.16E-01 | 1537 | 1.50  | 1.32E-01 | 2016 | 0.20  | 8.45E-01 | 6176 |
| <i>PON1/2/3/4</i>   | rs854568   | G | A | 0.22 | 2.97  | 1.09E-02 | 1600 | 1.09  | 2.74E-01 | 2693 | 0.33  | 7.44E-01 | 1543 | 0.74  | 4.58E-01 | 2020 | 1.30  | 1.93E-01 | 6256 |
| <i>HDLBP</i>        | rs2305071  | C | G | 0.12 | -2.41 | 1.10E-02 | 1600 | 1.18  | 2.37E-01 | 2693 | 0.15  | 8.77E-01 | 1536 | 0.89  | 3.72E-01 | 2020 | 1.36  | 1.74E-01 | 6249 |
| <i>PON1/2/3/4</i>   | rs13228784 | G | A | 0.23 | 2.59  | 1.11E-02 | 1600 | 0.67  | 5.06E-01 | 2693 | 0.70  | 4.84E-01 | 1543 | 2.48  | 1.30E-02 | 2020 | 2.20  | 2.81E-02 | 6256 |
| <i>PON1/2/3/4</i>   | rs740264   | C | A | 0.23 | 2.59  | 1.11E-02 | 1600 | 0.60  | 5.48E-01 | 2693 | 0.77  | 4.42E-01 | 1543 | 2.45  | 1.42E-02 | 2019 | 2.17  | 3.01E-02 | 6255 |
| <i>PAFAH1B2</i>     | rs10790175 | A | G | 0.23 | 2.69  | 1.12E-02 | 1600 | 2.26  | 2.38E-02 | 2693 | -0.75 | 4.51E-01 | 1540 | -0.23 | 8.19E-01 | 2020 | 0.98  | 3.28E-01 | 6253 |
| <i>LIPC</i>         | rs1800588  | A | G | 0.19 | 2.54  | 1.15E-02 | 1600 | 1.33  | 1.85E-01 | 2692 | 3.46  | 5.64E-04 | 1541 | 2.62  | 8.70E-03 | 2019 | 4.07  | 4.65E-05 | 6252 |
| <i>PON1/2/3/4</i>   | rs2272365  | C | A | 0.16 | -2.67 | 1.15E-02 | 1600 | 0.23  | 8.16E-01 | 2692 | 0.23  | 8.21E-01 | 1542 | 0.11  | 9.13E-01 | 2020 | 0.33  | 7.44E-01 | 6254 |
| <i>LPL</i>          | rs3289     | G | A | 0.03 | -2.30 | 1.16E-02 | 1600 | -2.23 | 2.58E-02 | 2692 | -1.51 | 1.32E-01 | 1542 | -1.08 | 2.81E-01 | 2020 | -2.83 | 4.73E-03 | 6254 |

|                       |            |   |   |      |       |          |      |       |          |      |       |          |      |       |          |      |       |          |      |
|-----------------------|------------|---|---|------|-------|----------|------|-------|----------|------|-------|----------|------|-------|----------|------|-------|----------|------|
| <i>PCSK5</i>          | rs1339248  | G | A | 0.13 | 2.48  | 1.19E-02 | 1600 | 0.54  | 5.88E-01 | 2689 | 1.43  | 1.53E-01 | 1544 | -1.55 | 1.21E-01 | 2020 | 0.19  | 8.53E-01 | 6253 |
| <i>ABCA1</i>          | rs4149313  | G | A | 0.13 | 2.26  | 1.19E-02 | 1600 | 1.56  | 1.20E-01 | 2693 | 1.42  | 1.56E-01 | 1543 | -0.01 | 9.88E-01 | 2020 | 1.72  | 8.61E-02 | 6256 |
| <i>RXRA</i>           | rs1805348  | A | G | 0.01 | 2.35  | 1.19E-02 | 1600 | -0.15 | 8.84E-01 | 2693 | -1.10 | 2.70E-01 | 1542 | -1.17 | 2.41E-01 | 2020 | -1.31 | 1.90E-01 | 6255 |
| <i>GPR109A/B/81</i>   | rs7972971  | C | A | 0.37 | 2.52  | 1.20E-02 | 1589 | -0.72 | 4.74E-01 | 2681 | -2.13 | 3.30E-02 | 1537 | -1.87 | 6.09E-02 | 2016 | -2.59 | 9.49E-03 | 6234 |
| <i>CETP</i>           | rs12447839 | G | A | 0.24 | -2.05 | 1.21E-02 | 1585 | -2.18 | 2.97E-02 | 2587 | -0.62 | 5.34E-01 | 1540 | -2.75 | 5.93E-03 | 2016 | -3.30 | 9.71E-04 | 6143 |
| <i>PPARA</i>          | rs9626737  | G | A | 0.03 | -2.53 | 1.21E-02 | 1600 | 0.63  | 5.29E-01 | 2693 | 1.18  | 2.38E-01 | 1537 | 0.46  | 6.49E-01 | 2020 | 1.26  | 2.09E-01 | 6250 |
| <i>LCAT</i>           | rs17240399 | A | G | 0.01 | -2.23 | 1.23E-02 | 1576 | -0.28 | 7.82E-01 | 2470 | -0.89 | 3.74E-01 | 1431 | -0.10 | 9.22E-01 | 2014 | -0.67 | 5.01E-01 | 5915 |
| <i>PLTP</i>           | rs11569668 | A | G | 0.03 | -2.34 | 1.26E-02 | 1599 | 0.49  | 6.24E-01 | 2684 | -0.86 | 3.91E-01 | 1510 | 0.54  | 5.88E-01 | 2018 | 0.21  | 8.35E-01 | 6212 |
| <i>NFKB1</i>          | rs1598857  | A | G | 0.35 | 2.37  | 1.33E-02 | 1599 | 1.08  | 2.80E-01 | 2686 | -0.28 | 7.83E-01 | 1538 | 1.96  | 4.94E-02 | 2018 | 1.69  | 9.12E-02 | 6242 |
| <i>CETP</i>           | rs289715   | A | T | 0.11 | 2.27  | 1.35E-02 | 1600 | 0.03  | 9.77E-01 | 2693 | 2.65  | 8.07E-03 | 1543 | 2.63  | 8.61E-03 | 2020 | 2.83  | 4.69E-03 | 6256 |
| <i>PCSK5</i>          | rs17668141 | A | G | 0.38 | -2.58 | 1.36E-02 | 1600 | -2.39 | 1.70E-02 | 2692 | -1.56 | 1.18E-01 | 1544 | 1.41  | 1.59E-01 | 2019 | -1.54 | 1.23E-01 | 6255 |
| <i>CUBN</i>           | rs2271469  | A | C | 0.53 | -2.43 | 1.39E-02 | 1600 | 1.57  | 1.17E-01 | 2693 | -0.36 | 7.17E-01 | 1544 | 1.84  | 6.58E-02 | 2020 | 0.20  | 8.43E-01 | 6257 |
| <i>APOA1/A4/A5/C3</i> | rs689243   | G | C | 0.35 | 2.51  | 1.39E-02 | 1600 | 2.25  | 2.43E-02 | 2693 | 0.03  | 9.79E-01 | 1541 | -0.42 | 6.78E-01 | 2020 | 1.26  | 2.10E-01 | 6254 |
| <i>CETP</i>           | rs4783962  | A | G | 0.24 | -2.00 | 1.39E-02 | 1600 | -2.18 | 2.96E-02 | 2693 | -0.66 | 5.09E-01 | 1540 | -2.61 | 9.14E-03 | 2019 | -3.24 | 1.21E-03 | 6252 |
| <i>PPARG</i>          | rs1152001  | G | A | 0.20 | 2.36  | 1.41E-02 | 1599 | -0.71 | 4.77E-01 | 2692 | -0.38 | 7.04E-01 | 1541 | -2.84 | 4.52E-03 | 2020 | -2.27 | 2.33E-02 | 6253 |
| <i>PPARD</i>          | rs1053049  | G | A | 0.25 | 2.47  | 1.44E-02 | 1600 | 2.05  | 4.05E-02 | 2691 | 0.09  | 9.29E-01 | 1536 | 0.46  | 6.44E-01 | 2020 | 1.65  | 9.85E-02 | 6247 |
| <i>LIPC</i>           | rs4775070  | A | G | 0.03 | 2.47  | 1.44E-02 | 1600 | 1.59  | 1.13E-01 | 2693 | 0.45  | 6.52E-01 | 1544 | 1.75  | 8.04E-02 | 2020 | 2.26  | 2.40E-02 | 6257 |
| <i>LPL</i>            | rs258      | G | C | 0.41 | 2.43  | 1.49E-02 | 1600 | 1.34  | 1.81E-01 | 2693 | 1.95  | 5.16E-02 | 1540 | 1.25  | 2.11E-01 | 2018 | 2.56  | 1.06E-02 | 6251 |
| <i>SOAT1</i>          | rs4421551  | C | A | 0.13 | 2.55  | 1.52E-02 | 1600 | 2.12  | 3.40E-02 | 2690 | 0.90  | 3.68E-01 | 1530 | 0.06  | 9.56E-01 | 2020 | 1.87  | 6.16E-02 | 6240 |
| <i>PCSK5</i>          | rs4552981  | A | T | 0.46 | 2.55  | 1.53E-02 | 1600 | 1.33  | 1.82E-01 | 2693 | 0.56  | 5.74E-01 | 1544 | -0.27 | 7.84E-01 | 2019 | 1.00  | 3.18E-01 | 6256 |
| <i>ABCG1</i>          | rs4148139  | A | G | 0.19 | 2.46  | 1.53E-02 | 1600 | 2.84  | 4.57E-03 | 2693 | 0.95  | 3.41E-01 | 1543 | 1.46  | 1.44E-01 | 2020 | 3.16  | 1.56E-03 | 6256 |



|                     |            |   |   |      |       |          |      |       |          |      |       |          |      |       |          |      |       |          |      |
|---------------------|------------|---|---|------|-------|----------|------|-------|----------|------|-------|----------|------|-------|----------|------|-------|----------|------|
| <i>LPL</i>          | rs253      | A | G | 0.41 | 2.45  | 1.57E-02 | 1600 | 1.58  | 1.15E-01 | 2692 | 1.42  | 1.56E-01 | 1537 | 1.08  | 2.78E-01 | 2020 | 2.36  | 1.85E-02 | 6249 |
| <i>NFKB1</i>        | rs1599961  | A | G | 0.36 | 2.32  | 1.59E-02 | 1600 | 1.03  | 3.01E-01 | 2693 | -0.29 | 7.72E-01 | 1539 | 1.97  | 4.88E-02 | 2020 | 1.65  | 9.81E-02 | 6252 |
| <i>CUBN</i>         | rs7893634  | A | G | 0.39 | -2.41 | 1.59E-02 | 1600 | 0.94  | 3.47E-01 | 2693 | -1.81 | 7.03E-02 | 1542 | 0.46  | 6.44E-01 | 2019 | -0.02 | 9.85E-01 | 6254 |
| <i>PCSK5</i>        | rs2789608  | G | C | 0.38 | 2.45  | 1.61E-02 | 1599 | 2.63  | 8.58E-03 | 2693 | 0.93  | 3.54E-01 | 1543 | -1.36 | 1.73E-01 | 2020 | 1.41  | 1.58E-01 | 6256 |
| <i>CETP</i>         | rs4587963  | A | T | 0.23 | -1.95 | 1.67E-02 | 1597 | -2.28 | 2.29E-02 | 2686 | -0.33 | 7.40E-01 | 1533 | -2.80 | 5.16E-03 | 2019 | -3.25 | 1.16E-03 | 6238 |
| <i>LIPC</i>         | rs1869145  | G | A | 0.22 | 2.13  | 1.71E-02 | 1600 | -0.75 | 4.52E-01 | 2690 | -0.92 | 3.58E-01 | 1538 | 1.53  | 1.25E-01 | 2019 | -0.08 | 9.38E-01 | 6247 |
| <i>NFKB1</i>        | rs3774933  | G | A | 0.36 | 2.28  | 1.72E-02 | 1600 | 1.02  | 3.06E-01 | 2692 | -0.21 | 8.32E-01 | 1540 | 2.02  | 4.29E-02 | 2019 | 1.72  | 8.60E-02 | 6251 |
| <i>LRP1</i>         | rs7398375  | G | C | 0.28 | -2.23 | 1.74E-02 | 1600 | 1.10  | 2.72E-01 | 2693 | 0.61  | 5.44E-01 | 1541 | 0.74  | 4.58E-01 | 2020 | 1.44  | 1.49E-01 | 6254 |
| <i>ABCA1</i>        | rs2472507  | C | A | 0.22 | 2.23  | 1.76E-02 | 1600 | 1.57  | 1.16E-01 | 2693 | 0.71  | 4.77E-01 | 1544 | 1.38  | 1.69E-01 | 2020 | 2.17  | 3.02E-02 | 6257 |
| <i>NFKB1</i>        | rs4648004  | G | A | 0.36 | -2.25 | 1.79E-02 | 1599 | 0.46  | 6.42E-01 | 2693 | 0.59  | 5.55E-01 | 1542 | -1.65 | 9.98E-02 | 2020 | -0.34 | 7.36E-01 | 6255 |
| <i>TCF1</i>         | rs2464196  | A | G | 0.32 | 2.62  | 1.80E-02 | 1600 | 1.42  | 1.55E-01 | 2693 | -0.37 | 7.08E-01 | 1532 | -0.05 | 9.61E-01 | 2020 | 0.72  | 4.72E-01 | 6245 |
| <i>PCSK5</i>        | rs1856508  | A | C | 0.08 | 2.29  | 1.80E-02 | 1598 | 1.01  | 3.12E-01 | 2690 | 1.33  | 1.83E-01 | 1537 | 0.40  | 6.86E-01 | 2020 | 1.55  | 1.20E-01 | 6247 |
| <i>FADS1/2/3</i>    | rs102275   | G | A | 0.35 | -2.44 | 1.81E-02 | 1600 | -2.19 | 2.88E-02 | 2693 | -0.75 | 4.54E-01 | 1541 | -2.91 | 3.64E-03 | 2020 | -3.46 | 5.42E-04 | 6254 |
| <i>ABCG4</i>        | rs626776   | G | C | 0.35 | -2.03 | 1.81E-02 | 1600 | -0.07 | 9.46E-01 | 2693 | 1.57  | 1.16E-01 | 1543 | 2.59  | 9.48E-03 | 2020 | 2.21  | 2.71E-02 | 6256 |
| <i>RXRA</i>         | rs35180144 | C | A | 0.09 | -2.11 | 1.82E-02 | 1598 | -1.42 | 1.57E-01 | 2693 | -0.31 | 7.60E-01 | 1544 | 0.10  | 9.24E-01 | 2019 | -1.03 | 3.04E-01 | 6256 |
| <i>GPR109A/B/81</i> | rs4759383  | G | A | 0.45 | -2.64 | 1.82E-02 | 1600 | 0.99  | 3.23E-01 | 2693 | 1.57  | 1.16E-01 | 1544 | 0.68  | 4.94E-01 | 2020 | 1.82  | 6.90E-02 | 6257 |
| <i>CUBN</i>         | rs1687714  | A | C | 0.35 | 2.22  | 1.83E-02 | 1600 | -1.80 | 7.27E-02 | 2693 | 0.73  | 4.68E-01 | 1544 | 0.69  | 4.91E-01 | 2020 | -0.43 | 6.70E-01 | 6257 |
| <i>LIPC</i>         | rs12900448 | A | G | 0.22 | 2.09  | 1.84E-02 | 1600 | -0.57 | 5.70E-01 | 2693 | -0.84 | 4.00E-01 | 1543 | 1.56  | 1.19E-01 | 2020 | -0.10 | 9.24E-01 | 6256 |
| <i>LIPC</i>         | rs12898984 | A | G | 0.22 | 2.08  | 1.84E-02 | 1600 | -0.59 | 5.56E-01 | 2693 | -0.88 | 3.81E-01 | 1544 | 1.56  | 1.19E-01 | 2020 | -0.06 | 9.49E-01 | 6257 |
| <i>PPARD</i>        | rs2076167  | G | A | 0.24 | 2.38  | 1.89E-02 | 1600 | 2.08  | 3.78E-02 | 2693 | 0.15  | 8.82E-01 | 1543 | 0.39  | 7.00E-01 | 2020 | 1.66  | 9.77E-02 | 6256 |
| <i>SCARB1</i>       | rs4765623  | A | G | 0.34 | 2.11  | 1.90E-02 | 1600 | 0.88  | 3.81E-01 | 2692 | 0.86  | 3.90E-01 | 1544 | -0.63 | 5.27E-01 | 2020 | 0.64  | 5.21E-01 | 6256 |

|                   |            |   |   |      |       |          |      |       |          |      |       |          |      |       |          |      |       |          |      |
|-------------------|------------|---|---|------|-------|----------|------|-------|----------|------|-------|----------|------|-------|----------|------|-------|----------|------|
| <i>CUBN</i>       | rs1707289  | C | A | 0.35 | 2.19  | 1.92E-02 | 1597 | -1.86 | 6.36E-02 | 2689 | 0.73  | 4.64E-01 | 1537 | 0.65  | 5.14E-01 | 2020 | -0.48 | 6.30E-01 | 6246 |
| <i>LRP1</i>       | rs715948   | A | G | 0.32 | -2.32 | 1.99E-02 | 1600 | 1.00  | 3.17E-01 | 2693 | 1.54  | 1.23E-01 | 1544 | 2.02  | 4.32E-02 | 2020 | 2.57  | 1.01E-02 | 6257 |
| <i>FAS</i>        | rs1291206  | A | G | 0.21 | 2.22  | 2.00E-02 | 1597 | 0.48  | 6.31E-01 | 2690 | 0.40  | 6.92E-01 | 1518 | -1.51 | 1.30E-01 | 2020 | -0.35 | 7.27E-01 | 6228 |
| <i>ABCA1</i>      | rs2275545  | G | A | 0.16 | -2.27 | 2.11E-02 | 1600 | -0.26 | 7.95E-01 | 2693 | -1.75 | 7.97E-02 | 1542 | -1.90 | 5.74E-02 | 2020 | -2.12 | 3.40E-02 | 6255 |
| <i>LIPC</i>       | rs588136   | G | A | 0.19 | 2.36  | 2.11E-02 | 1585 | 2.10  | 3.63E-02 | 2670 | 3.38  | 7.58E-04 | 1531 | 2.19  | 2.89E-02 | 2020 | 4.29  | 1.81E-05 | 6221 |
| <i>PPARD</i>      | rs2267667  | G | C | 0.25 | 2.35  | 2.11E-02 | 1600 | 1.80  | 7.14E-02 | 2693 | 0.73  | 4.68E-01 | 1544 | 0.43  | 6.68E-01 | 2020 | 1.79  | 7.40E-02 | 6257 |
| <i>LIPC</i>       | rs12909642 | A | C | 0.14 | -2.19 | 2.13E-02 | 1600 | 0.47  | 6.36E-01 | 2693 | -1.21 | 2.25E-01 | 1543 | 0.37  | 7.12E-01 | 2018 | -0.08 | 9.35E-01 | 6254 |
| <i>NFKB1</i>      | rs4648011  | C | A | 0.36 | 2.22  | 2.15E-02 | 1600 | 0.93  | 3.52E-01 | 2693 | -0.03 | 9.73E-01 | 1538 | 2.15  | 3.19E-02 | 2018 | 1.81  | 6.98E-02 | 6249 |
| <i>PLTP</i>       | rs378114   | A | G | 0.26 | 1.91  | 2.17E-02 | 1598 | 1.17  | 2.43E-01 | 2693 | 0.65  | 5.18E-01 | 1543 | 1.97  | 4.83E-02 | 2020 | 2.21  | 2.72E-02 | 6256 |
| <i>PON1/2/3/4</i> | rs11768074 | A | G | 0.14 | 2.36  | 2.19E-02 | 1600 | -0.39 | 6.96E-01 | 2693 | 0.35  | 7.23E-01 | 1543 | 1.20  | 2.29E-01 | 2020 | 0.60  | 5.46E-01 | 6256 |
| <i>LPL</i>        | rs10099160 | C | A | 0.22 | -2.50 | 2.22E-02 | 1600 | -1.12 | 2.65E-01 | 2693 | -0.30 | 7.67E-01 | 1542 | -1.75 | 7.93E-02 | 2020 | -1.88 | 6.06E-02 | 6255 |
| <i>ABCG1</i>      | rs914189   | C | G | 0.19 | 2.34  | 2.23E-02 | 1600 | 2.78  | 5.50E-03 | 2693 | 1.20  | 2.29E-01 | 1544 | 1.51  | 1.32E-01 | 2020 | 3.27  | 1.06E-03 | 6257 |
| <i>PPARG</i>      | rs2067819  | A | G | 0.20 | 2.23  | 2.25E-02 | 1599 | 0.19  | 8.50E-01 | 2692 | -0.51 | 6.11E-01 | 1542 | -0.88 | 3.76E-01 | 2017 | -0.63 | 5.28E-01 | 6251 |
| <i>APOE/C1/C2</i> | rs1064725  | C | A | 0.04 | 2.09  | 2.25E-02 | 1600 | -0.34 | 7.33E-01 | 2691 | 0.03  | 9.72E-01 | 1542 | -1.23 | 2.20E-01 | 2020 | -0.90 | 3.66E-01 | 6253 |
| <i>LIPC</i>       | rs4774301  | A | G | 0.23 | 2.04  | 2.27E-02 | 1600 | -0.87 | 3.85E-01 | 2693 | -0.74 | 4.59E-01 | 1543 | 1.65  | 9.92E-02 | 2020 | 0.00  | 9.99E-01 | 6256 |
| <i>ABCA1</i>      | rs3780542  | A | G | 0.07 | 2.16  | 2.28E-02 | 1600 | 0.32  | 7.47E-01 | 2693 | 1.03  | 3.05E-01 | 1536 | 1.32  | 1.88E-01 | 2018 | 1.47  | 1.42E-01 | 6247 |
| <i>CUBN</i>       | rs1707277  | A | G | 0.35 | 2.13  | 2.31E-02 | 1600 | -1.78 | 7.53E-02 | 2692 | 0.74  | 4.57E-01 | 1544 | 0.67  | 5.06E-01 | 2020 | -0.42 | 6.76E-01 | 6256 |
| <i>LPL</i>        | rs3200218  | G | A | 0.22 | -2.49 | 2.31E-02 | 1600 | -1.20 | 2.32E-01 | 2693 | -0.26 | 7.98E-01 | 1540 | -1.68 | 9.25E-02 | 2020 | -1.87 | 6.18E-02 | 6253 |
| <i>ABCA1</i>      | rs2275544  | G | A | 0.15 | -2.26 | 2.32E-02 | 1599 | -0.49 | 6.26E-01 | 2693 | -1.81 | 7.02E-02 | 1542 | -1.76 | 7.87E-02 | 2019 | -2.22 | 2.65E-02 | 6254 |
| <i>LIPC</i>       | rs17301781 | A | G | 0.14 | -2.14 | 2.38E-02 | 1600 | 0.23  | 8.17E-01 | 2693 | -1.26 | 2.09E-01 | 1544 | 0.33  | 7.40E-01 | 2020 | -0.29 | 7.76E-01 | 6257 |
| <i>HNF4A</i>      | rs11574736 | G | C | 0.16 | 2.56  | 2.44E-02 | 1600 | 1.26  | 2.07E-01 | 2693 | -0.76 | 4.50E-01 | 1540 | -2.49 | 1.28E-02 | 2019 | -0.96 | 3.37E-01 | 6252 |

|                   |            |   |   |      |       |          |      |       |          |      |       |          |      |       |          |      |       |          |      |
|-------------------|------------|---|---|------|-------|----------|------|-------|----------|------|-------|----------|------|-------|----------|------|-------|----------|------|
| <i>ABCB4</i>      | rs8187799  | G | A | 0.09 | -2.11 | 2.45E-02 | 1600 | -0.45 | 6.51E-01 | 2693 | -0.88 | 3.78E-01 | 1544 | -0.53 | 5.99E-01 | 2020 | -1.03 | 3.01E-01 | 6257 |
| <i>PON1/2/3/4</i> | rs705382   | C | G | 0.35 | 2.45  | 2.50E-02 | 1599 | -0.84 | 4.01E-01 | 2693 | 1.44  | 1.51E-01 | 1544 | 0.93  | 3.52E-01 | 2020 | 0.69  | 4.89E-01 | 6257 |
| <i>CUBN</i>       | rs4525114  | G | A | 0.05 | 1.91  | 2.53E-02 | 1599 | -0.62 | 5.35E-01 | 2692 | -0.53 | 5.95E-01 | 1543 | -0.88 | 3.80E-01 | 2018 | -1.17 | 2.42E-01 | 6253 |
| <i>PCSK6</i>      | rs7179905  | T | A | 0.18 | 2.40  | 2.55E-02 | 1503 | 0.01  | 9.93E-01 | 2624 | -0.44 | 6.57E-01 | 1496 | NA    | NA       | 0    | -0.26 | 7.95E-01 | 4120 |
| <i>LIPC</i>       | rs8028759  | G | A | 0.32 | 2.02  | 2.56E-02 | 1600 | -0.06 | 9.54E-01 | 2693 | 1.80  | 7.17E-02 | 1543 | 1.00  | 3.16E-01 | 2020 | 1.43  | 1.54E-01 | 6256 |
| <i>SORCS1</i>     | rs17121941 | G | A | 0.09 | 2.32  | 2.61E-02 | 1600 | -0.51 | 6.12E-01 | 2687 | 2.05  | 4.03E-02 | 1544 | 0.53  | 5.93E-01 | 2020 | 0.99  | 3.22E-01 | 6251 |
| <i>SOAT1</i>      | rs3753525  | A | C | 0.27 | 2.43  | 2.61E-02 | 1600 | 1.72  | 8.54E-02 | 2693 | 0.13  | 8.98E-01 | 1541 | -0.47 | 6.41E-01 | 2020 | 0.93  | 3.54E-01 | 6254 |
| <i>ABCA1</i>      | rs3847300  | A | G | 0.14 | -2.11 | 2.62E-02 | 1505 | -0.95 | 3.41E-01 | 2632 | -2.45 | 1.46E-02 | 1495 | -1.66 | 9.75E-02 | 2018 | -2.78 | 5.47E-03 | 6145 |
| <i>CUBN</i>       | rs1707278  | C | G | 0.35 | 2.08  | 2.67E-02 | 1600 | -1.91 | 5.58E-02 | 2692 | 0.79  | 4.31E-01 | 1542 | 0.70  | 4.85E-01 | 2020 | -0.47 | 6.41E-01 | 6254 |
| <i>SORCS1</i>     | rs12243117 | A | G | 0.01 | 2.03  | 2.67E-02 | 1600 | 0.75  | 4.53E-01 | 2693 | -1.13 | 2.58E-01 | 1544 | -0.15 | 8.80E-01 | 2020 | -0.16 | 8.76E-01 | 6257 |
| <i>PCSK5</i>      | rs3814115  | G | A | 0.35 | -2.24 | 2.70E-02 | 1600 | -2.05 | 4.04E-02 | 2687 | 0.73  | 4.69E-01 | 1544 | 0.96  | 3.35E-01 | 2020 | -0.44 | 6.63E-01 | 6251 |
| <i>APOE/C1/C2</i> | rs2075650  | G | A | 0.15 | -2.34 | 2.74E-02 | 1600 | -4.15 | 3.46E-05 | 2693 | -2.31 | 2.12E-02 | 1544 | -1.36 | 1.73E-01 | 2020 | -4.64 | 3.55E-06 | 6257 |
| <i>HDLBP</i>      | rs2305076  | A | G | 0.10 | -2.09 | 2.74E-02 | 1600 | 0.68  | 4.98E-01 | 2693 | 1.32  | 1.88E-01 | 1544 | 0.75  | 4.51E-01 | 2020 | 1.53  | 1.27E-01 | 6257 |
| <i>PON1/2/3/4</i> | rs11764079 | A | G | 0.24 | 2.23  | 2.75E-02 | 1600 | 0.60  | 5.46E-01 | 2693 | 1.27  | 2.03E-01 | 1538 | 2.33  | 2.00E-02 | 2019 | 2.35  | 1.88E-02 | 6250 |
| <i>PON1/2/3/4</i> | rs13226149 | A | G | 0.24 | 2.22  | 2.75E-02 | 1600 | 0.41  | 6.78E-01 | 2693 | 1.26  | 2.08E-01 | 1538 | 2.20  | 2.76E-02 | 2020 | 2.15  | 3.16E-02 | 6251 |
| <i>CUBN</i>       | rs10904839 | G | A | 0.22 | -2.21 | 2.77E-02 | 1600 | 0.77  | 4.40E-01 | 2693 | -1.32 | 1.88E-01 | 1544 | 0.90  | 3.66E-01 | 2020 | -0.37 | 7.15E-01 | 6257 |
| <i>PCSK5</i>      | rs1023181  | G | A | 0.29 | 2.24  | 2.79E-02 | 1600 | 0.15  | 8.83E-01 | 2693 | 0.51  | 6.12E-01 | 1541 | 1.81  | 6.97E-02 | 2020 | 1.38  | 1.68E-01 | 6254 |
| <i>SCARB1</i>     | rs10744182 | G | A | 0.41 | -2.15 | 2.82E-02 | 1545 | 0.36  | 7.17E-01 | 2604 | 0.32  | 7.48E-01 | 1351 | 0.93  | 3.51E-01 | 2001 | 0.93  | 3.50E-01 | 5956 |
| <i>PDZK1IP1</i>   | rs11211477 | A | G | 0.28 | -1.91 | 2.84E-02 | 1600 | 0.75  | 4.53E-01 | 2693 | 1.42  | 1.56E-01 | 1543 | -0.24 | 8.09E-01 | 2020 | 1.06  | 2.89E-01 | 6256 |
| <i>SCARB1</i>     | rs1070544  | C | A | 0.03 | 2.03  | 2.84E-02 | 1600 | 0.54  | 5.92E-01 | 2693 | 1.08  | 2.79E-01 | 1543 | -0.41 | 6.78E-01 | 2019 | 0.65  | 5.14E-01 | 6255 |
| <i>NFKB1</i>      | rs230541   | G | A | 0.37 | 2.17  | 2.84E-02 | 1600 | 1.52  | 1.29E-01 | 2693 | -0.01 | 9.91E-01 | 1541 | 1.96  | 4.98E-02 | 2019 | 2.11  | 3.52E-02 | 6253 |

|               |            |   |   |      |       |          |      |       |          |      |       |          |      |       |          |      |       |          |      |
|---------------|------------|---|---|------|-------|----------|------|-------|----------|------|-------|----------|------|-------|----------|------|-------|----------|------|
| <i>ABCA1</i>  | rs3858076  | C | A | 0.16 | -2.18 | 2.90E-02 | 1599 | -0.47 | 6.42E-01 | 2692 | -1.81 | 7.01E-02 | 1541 | -1.88 | 5.96E-02 | 2020 | -2.28 | 2.29E-02 | 6253 |
| <i>FAS</i>    | rs9658771  | A | G | 0.02 | 2.09  | 2.98E-02 | 1600 | -0.63 | 5.30E-01 | 2693 | -0.21 | 8.36E-01 | 1543 | 1.91  | 5.60E-02 | 2020 | 0.57  | 5.68E-01 | 6256 |
| <i>LIPC</i>   | rs12914552 | G | C | 0.18 | -2.00 | 3.00E-02 | 1600 | 0.11  | 9.16E-01 | 2693 | -1.42 | 1.57E-01 | 1542 | 0.28  | 7.79E-01 | 2020 | -0.48 | 6.35E-01 | 6255 |
| <i>LIPC</i>   | rs9652472  | G | A | 0.05 | 2.30  | 3.02E-02 | 1599 | 1.19  | 2.36E-01 | 2683 | -0.73 | 4.64E-01 | 1542 | 0.66  | 5.10E-01 | 2020 | 0.79  | 4.31E-01 | 6245 |
| <i>PPARA</i>  | rs4253650  | A | G | 0.04 | -2.17 | 3.03E-02 | 1599 | 1.21  | 2.27E-01 | 2690 | -0.68 | 4.99E-01 | 1544 | -0.05 | 9.60E-01 | 2019 | 0.43  | 6.69E-01 | 6253 |
| <i>ABCA1</i>  | rs1800977  | A | G | 0.36 | 2.24  | 3.05E-02 | 1600 | 2.27  | 2.34E-02 | 2693 | 0.72  | 4.74E-01 | 1543 | 0.64  | 5.24E-01 | 2020 | 2.21  | 2.74E-02 | 6256 |
| <i>NFKB1</i>  | rs1287     | A | G | 0.37 | 2.13  | 3.17E-02 | 1600 | 1.47  | 1.41E-01 | 2692 | -0.02 | 9.83E-01 | 1536 | 2.01  | 4.48E-02 | 2019 | 2.10  | 3.59E-02 | 6247 |
| <i>PPARD</i>  | rs9658105  | A | G | 0.04 | -2.14 | 3.20E-02 | 1600 | -0.38 | 7.07E-01 | 2693 | -1.85 | 6.46E-02 | 1542 | 0.17  | 8.61E-01 | 2020 | -1.07 | 2.87E-01 | 6255 |
| <i>LIPG</i>   | rs4245232  | A | C | 0.19 | -2.07 | 3.22E-02 | 1585 | -0.36 | 7.16E-01 | 2684 | NA    | NA       | 0    | -0.11 | 9.12E-01 | 2020 | -0.35 | 7.28E-01 | 4704 |
| <i>ABCA1</i>  | rs2065412  | G | A | 0.41 | -2.00 | 3.24E-02 | 1600 | -0.78 | 4.35E-01 | 2693 | -0.79 | 4.27E-01 | 1543 | -1.03 | 3.03E-01 | 2020 | -1.49 | 1.36E-01 | 6256 |
| <i>RXRA</i>   | rs7853153  | A | G | 0.03 | 2.19  | 3.26E-02 | 1600 | 2.07  | 3.89E-02 | 2691 | -0.24 | 8.11E-01 | 1541 | -0.19 | 8.49E-01 | 2020 | 1.13  | 2.59E-01 | 6252 |
| <i>LIPC</i>   | rs8039477  | G | A | 0.12 | 2.02  | 3.29E-02 | 1597 | 1.00  | 3.17E-01 | 2692 | 0.89  | 3.75E-01 | 1534 | -0.71 | 4.77E-01 | 2020 | 0.69  | 4.89E-01 | 6246 |
| <i>SCARB1</i> | rs12229555 | G | A | 0.21 | 2.06  | 3.32E-02 | 1599 | 0.52  | 6.04E-01 | 2693 | -0.14 | 8.87E-01 | 1542 | -0.69 | 4.91E-01 | 2019 | -0.12 | 9.03E-01 | 6254 |
| <i>PPARD</i>  | rs9658083  | G | C | 0.08 | 1.84  | 3.36E-02 | 1600 | 0.07  | 9.44E-01 | 2689 | 0.12  | 9.01E-01 | 1544 | -0.48 | 6.28E-01 | 2019 | -0.17 | 8.67E-01 | 6252 |
| <i>ABCA1</i>  | rs13284054 | G | A | 0.14 | -2.04 | 3.52E-02 | 1579 | -1.44 | 1.52E-01 | 2661 | -2.39 | 1.70E-02 | 1537 | -1.53 | 1.27E-01 | 2017 | -3.00 | 2.74E-03 | 6215 |
| <i>NFKB1</i>  | rs1598861  | C | A | 0.43 | -1.89 | 3.52E-02 | 1555 | 0.28  | 7.78E-01 | 2097 | 0.47  | 6.39E-01 | 1493 | -1.87 | 6.20E-02 | 1967 | -0.69 | 4.88E-01 | 5557 |
| <i>FAS</i>    | rs6010621  | A | C | 0.20 | 1.95  | 3.52E-02 | 1599 | -0.15 | 8.81E-01 | 2693 | 0.02  | 9.81E-01 | 1541 | -0.57 | 5.71E-01 | 2020 | -0.41 | 6.83E-01 | 6254 |
| <i>PPARD</i>  | rs7751726  | A | G | 0.04 | 1.93  | 3.55E-02 | 1600 | 1.51  | 1.32E-01 | 2693 | 0.69  | 4.92E-01 | 1544 | -0.75 | 4.55E-01 | 2017 | 0.91  | 3.64E-01 | 6254 |
| <i>SORCS1</i> | rs822090   | A | G | 0.04 | -1.96 | 3.55E-02 | 1600 | -0.29 | 7.74E-01 | 2687 | 1.89  | 5.95E-02 | 1544 | -1.16 | 2.47E-01 | 2019 | -0.09 | 9.29E-01 | 6250 |
| <i>PPARA</i>  | rs4253760  | C | A | 0.19 | -2.00 | 3.57E-02 | 1591 | 1.51  | 1.30E-01 | 2682 | 1.38  | 1.69E-01 | 1526 | 0.43  | 6.64E-01 | 2019 | 1.92  | 5.47E-02 | 6227 |
| <i>FAS</i>    | rs6010620  | A | G | 0.21 | 1.94  | 3.58E-02 | 1600 | -0.15 | 8.81E-01 | 2693 | 0.02  | 9.81E-01 | 1541 | -0.57 | 5.71E-01 | 2020 | -0.41 | 6.83E-01 | 6254 |

|                       |            |   |   |      |       |          |      |       |          |      |       |          |      |       |          |      |       |          |      |
|-----------------------|------------|---|---|------|-------|----------|------|-------|----------|------|-------|----------|------|-------|----------|------|-------|----------|------|
| <i>NFKB1</i>          | rs12509403 | A | G | 0.30 | 2.11  | 3.58E-02 | 1600 | 1.42  | 1.55E-01 | 2693 | 0.22  | 8.23E-01 | 1542 | 1.87  | 6.11E-02 | 2019 | 2.11  | 3.50E-02 | 6254 |
| <i>HDLBP</i>          | rs2305075  | G | A | 0.10 | -1.97 | 3.62E-02 | 1600 | 0.71  | 4.79E-01 | 2693 | 1.17  | 2.41E-01 | 1544 | 0.76  | 4.48E-01 | 2020 | 1.48  | 1.39E-01 | 6257 |
| <i>APOA1/A4/A5/C3</i> | rs12286037 | A | G | 0.08 | -2.33 | 3.64E-02 | 1600 | -2.08 | 3.75E-02 | 2693 | -1.36 | 1.74E-01 | 1543 | -1.19 | 2.36E-01 | 2018 | -2.71 | 6.65E-03 | 6254 |
| <i>CUBN</i>           | rs11254312 | A | C | 0.43 | 2.03  | 3.66E-02 | 1600 | -1.38 | 1.69E-01 | 2693 | 1.59  | 1.12E-01 | 1523 | -0.24 | 8.07E-01 | 2013 | -0.26 | 7.96E-01 | 6229 |
| <i>NFKB1</i>          | rs4648058  | C | G | 0.29 | 2.10  | 3.70E-02 | 1600 | 1.49  | 1.36E-01 | 2690 | 0.30  | 7.61E-01 | 1543 | 1.90  | 5.76E-02 | 2020 | 2.21  | 2.72E-02 | 6253 |
| <i>ABCA1</i>          | rs2575876  | A | G | 0.28 | -1.93 | 3.76E-02 | 1600 | -1.44 | 1.50E-01 | 2693 | -0.77 | 4.41E-01 | 1542 | -2.06 | 3.95E-02 | 2020 | -2.50 | 1.25E-02 | 6255 |
| <i>NR5A2</i>          | rs2248673  | G | A | 0.09 | 1.80  | 3.79E-02 | 1600 | 0.43  | 6.65E-01 | 2688 | 0.39  | 7.00E-01 | 1543 | -0.38 | 7.03E-01 | 2019 | 0.26  | 7.96E-01 | 6250 |
| <i>PPARD</i>          | rs9470001  | G | C | 0.08 | 1.80  | 3.84E-02 | 1600 | 0.05  | 9.63E-01 | 2693 | 0.12  | 9.01E-01 | 1544 | -0.48 | 6.29E-01 | 2020 | 0.18  | 8.56E-01 | 6257 |
| <i>ALCAM</i>          | rs1017913  | C | A | 0.38 | -2.08 | 3.84E-02 | 1584 | -1.03 | 3.04E-01 | 2657 | 1.49  | 1.37E-01 | 1542 | -0.48 | 6.30E-01 | 2016 | -0.21 | 8.37E-01 | 6215 |
| <i>FAS</i>            | rs2297438  | G | A | 0.21 | 1.91  | 3.85E-02 | 1599 | -0.15 | 8.81E-01 | 2693 | 0.17  | 8.67E-01 | 1541 | -0.57 | 5.71E-01 | 2020 | -0.34 | 7.36E-01 | 6254 |
| <i>NFKB1</i>          | rs4648133  | G | A | 0.29 | 2.01  | 3.87E-02 | 1600 | 0.97  | 3.31E-01 | 2693 | 0.00  | 9.99E-01 | 1544 | 1.73  | 8.33E-02 | 2020 | 1.62  | 1.05E-01 | 6257 |
| <i>SCARB1</i>         | rs745529   | A | C | 0.30 | 2.32  | 3.90E-02 | 1600 | 0.66  | 5.09E-01 | 2693 | 0.25  | 7.99E-01 | 1541 | 0.49  | 6.25E-01 | 2020 | 0.84  | 4.02E-01 | 6254 |
| <i>FAS</i>            | rs2236507  | G | C | 0.20 | 1.95  | 3.96E-02 | 1599 | -0.34 | 7.35E-01 | 2693 | 0.02  | 9.87E-01 | 1540 | -0.72 | 4.69E-01 | 2020 | -0.63 | 5.32E-01 | 6253 |
| <i>ABCG8</i>          | rs11124950 | A | G | 0.07 | 1.65  | 4.07E-02 | 1600 | 1.29  | 1.96E-01 | 2693 | -1.35 | 1.78E-01 | 1544 | -0.97 | 3.33E-01 | 2020 | -0.37 | 7.10E-01 | 6257 |
| <i>CAV1/2</i>         | rs3807992  | A | G | 0.23 | 1.99  | 4.07E-02 | 1600 | 0.48  | 6.30E-01 | 2692 | -0.84 | 4.02E-01 | 1541 | -1.46 | 1.44E-01 | 2020 | -0.93 | 3.53E-01 | 6253 |
| <i>CAV1/2</i>         | rs7804372  | A | T | 0.23 | 2.00  | 4.07E-02 | 1600 | 0.51  | 6.07E-01 | 2692 | -0.72 | 4.74E-01 | 1542 | -1.46 | 1.44E-01 | 2020 | -0.85 | 3.97E-01 | 6254 |
| <i>NFKB1</i>          | rs747559   | G | A | 0.36 | 1.96  | 4.07E-02 | 1600 | 1.19  | 2.36E-01 | 2693 | -0.30 | 7.64E-01 | 1539 | 1.95  | 5.08E-02 | 2019 | 1.74  | 8.19E-02 | 6251 |
| <i>SCARB1</i>         | rs838878   | A | G | 0.30 | 1.82  | 4.11E-02 | 1600 | 1.70  | 8.85E-02 | 2693 | 1.94  | 5.23E-02 | 1543 | 1.59  | 1.12E-01 | 2020 | 2.99  | 2.83E-03 | 6256 |
| <i>PPARD</i>          | rs6457816  | G | A | 0.09 | 1.80  | 4.11E-02 | 1600 | 0.10  | 9.19E-01 | 2693 | 0.42  | 6.76E-01 | 1544 | -0.66 | 5.07E-01 | 2020 | -0.10 | 9.18E-01 | 6257 |
| <i>LIPC</i>           | rs12898801 | A | G | 0.38 | 1.76  | 4.13E-02 | 1600 | -0.39 | 6.99E-01 | 2693 | -0.86 | 3.91E-01 | 1538 | 0.54  | 5.88E-01 | 2019 | -0.37 | 7.10E-01 | 6250 |
| <i>NFKB1</i>          | rs3817685  | C | G | 0.29 | 2.05  | 4.13E-02 | 1600 | 1.53  | 1.26E-01 | 2693 | 0.26  | 7.96E-01 | 1541 | 1.79  | 7.29E-02 | 2019 | 2.15  | 3.15E-02 | 6253 |

|                     |            |   |   |      |       |          |      |       |          |      |       |          |      |       |          |      |       |          |      |
|---------------------|------------|---|---|------|-------|----------|------|-------|----------|------|-------|----------|------|-------|----------|------|-------|----------|------|
| <i>PPARG</i>        | rs2881654  | A | G | 0.11 | 1.86  | 4.21E-02 | 1565 | 1.17  | 2.44E-01 | 2484 | -0.29 | 7.70E-01 | 1444 | -1.35 | 1.76E-01 | 2012 | -0.18 | 8.58E-01 | 5940 |
| <i>PON1/2/3/4</i>   | rs2299264  | A | G | 0.22 | 2.08  | 4.27E-02 | 1593 | 0.64  | 5.20E-01 | 2688 | 1.84  | 6.65E-02 | 1362 | 2.27  | 2.34E-02 | 2019 | 2.61  | 9.19E-03 | 6069 |
| <i>GPR109A/B/81</i> | rs4759361  | T | A | 0.17 | 2.13  | 4.27E-02 | 1600 | 1.87  | 6.16E-02 | 2691 | 0.16  | 8.72E-01 | 1542 | 2.38  | 1.72E-02 | 2019 | 2.66  | 7.80E-03 | 6252 |
| <i>ABCA1</i>        | rs13290420 | G | A | 0.13 | -1.97 | 4.27E-02 | 1600 | -0.81 | 4.17E-01 | 2693 | -2.62 | 8.88E-03 | 1544 | -1.64 | 1.02E-01 | 2020 | -2.76 | 5.74E-03 | 6257 |
| <i>PCSK5</i>        | rs2275406  | A | G | 0.12 | -1.82 | 4.27E-02 | 1596 | -1.84 | 6.63E-02 | 2693 | -0.07 | 9.41E-01 | 1537 | -0.38 | 7.03E-01 | 2020 | -1.46 | 1.45E-01 | 6250 |
| <i>SORCS1</i>       | rs11193220 | G | A | 0.02 | -2.02 | 4.27E-02 | 1600 | -1.23 | 2.20E-01 | 2693 | 1.52  | 1.28E-01 | 1544 | -1.53 | 1.26E-01 | 2020 | -0.92 | 3.59E-01 | 6257 |
| <i>PCSK5</i>        | rs17719860 | A | G | 0.10 | 2.09  | 4.30E-02 | 1600 | -0.22 | 8.29E-01 | 2693 | 0.84  | 4.01E-01 | 1544 | 0.17  | 8.66E-01 | 2019 | 0.37  | 7.10E-01 | 6256 |
| <i>NFKB1</i>        | rs980455   | G | A | 0.36 | 1.93  | 4.34E-02 | 1600 | 1.25  | 2.13E-01 | 2693 | -0.33 | 7.41E-01 | 1538 | 1.91  | 5.62E-02 | 2019 | 1.74  | 8.21E-02 | 6250 |
| <i>ABCA1</i>        | rs4149297  | G | A | 0.11 | -1.92 | 4.42E-02 | 1600 | -0.65 | 5.17E-01 | 2693 | -1.00 | 3.20E-01 | 1543 | 0.77  | 4.39E-01 | 2020 | -0.48 | 6.32E-01 | 6256 |
| <i>GPR109A/B/81</i> | rs579935   | A | C | 0.17 | 2.14  | 4.45E-02 | 1579 | 1.81  | 6.98E-02 | 2640 | 0.12  | 9.08E-01 | 1474 | 2.36  | 1.82E-02 | 1998 | 2.60  | 9.38E-03 | 6112 |
| <i>ABCG1</i>        | rs221948   | A | G | 0.10 | -1.69 | 4.47E-02 | 1600 | 0.42  | 6.77E-01 | 2693 | -0.35 | 7.27E-01 | 1544 | -1.15 | 2.49E-01 | 2020 | -0.56 | 5.79E-01 | 6257 |
| <i>PPARD</i>        | rs6906237  | A | C | 0.08 | 1.75  | 4.49E-02 | 1600 | 0.35  | 7.24E-01 | 2693 | 0.14  | 8.87E-01 | 1544 | -0.45 | 6.56E-01 | 2020 | 0.05  | 9.61E-01 | 6257 |
| <i>PPARA</i>        | rs8138102  | G | A | 0.24 | -2.05 | 4.49E-02 | 1599 | 1.42  | 1.57E-01 | 2692 | 1.87  | 6.21E-02 | 1544 | -0.31 | 7.53E-01 | 2020 | 1.68  | 9.36E-02 | 6256 |
| <i>LIPC</i>         | rs12592017 | G | A | 0.24 | 1.85  | 4.49E-02 | 1600 | -0.82 | 4.11E-01 | 2692 | -0.84 | 4.01E-01 | 1543 | 1.16  | 2.48E-01 | 2020 | 0.30  | 7.64E-01 | 6255 |
| <i>PPARA</i>        | rs4253778  | C | G | 0.19 | -1.91 | 4.51E-02 | 1600 | 1.64  | 1.02E-01 | 2693 | 1.24  | 2.15E-01 | 1544 | 0.39  | 6.95E-01 | 2019 | 1.91  | 5.60E-02 | 6256 |
| <i>PCSK5</i>        | rs10781328 | A | G | 0.12 | -1.82 | 4.53E-02 | 1597 | -2.02 | 4.34E-02 | 2687 | 0.29  | 7.71E-01 | 1532 | -0.67 | 5.01E-01 | 2018 | -1.56 | 1.18E-01 | 6237 |
| <i>ABCB11</i>       | rs2216504  | A | G | 0.04 | 2.04  | 4.67E-02 | 1600 | 0.55  | 5.82E-01 | 2693 | 0.07  | 9.44E-01 | 1544 | 0.91  | 3.61E-01 | 2020 | 0.92  | 3.60E-01 | 6257 |
| <i>NFKB1</i>        | rs4648051  | G | A | 0.28 | 1.95  | 4.71E-02 | 1599 | 1.09  | 2.78E-01 | 2690 | 0.03  | 9.73E-01 | 1539 | 1.98  | 4.75E-02 | 2018 | 1.86  | 6.35E-02 | 6247 |
| <i>CETP</i>         | rs1800776  | A | C | 0.08 | -1.63 | 4.72E-02 | 1600 | 0.29  | 7.70E-01 | 2693 | -2.10 | 3.57E-02 | 1544 | -1.79 | 7.37E-02 | 2020 | -1.87 | 6.18E-02 | 6257 |
| <i>ABCA1</i>        | rs3890182  | A | G | 0.13 | -1.94 | 4.72E-02 | 1600 | -0.89 | 3.75E-01 | 2692 | -2.51 | 1.21E-02 | 1543 | -1.72 | 8.56E-02 | 2020 | -2.80 | 5.04E-03 | 6255 |
| <i>SCARB1</i>       | rs10846745 | G | C | 0.43 | -1.90 | 4.73E-02 | 1600 | 0.76  | 4.45E-01 | 2693 | 1.37  | 1.70E-01 | 1541 | -0.65 | 5.16E-01 | 2020 | 0.81  | 4.16E-01 | 6254 |

|                       |            |   |   |      |       |          |      |       |          |      |       |          |      |       |          |      |       |          |      |
|-----------------------|------------|---|---|------|-------|----------|------|-------|----------|------|-------|----------|------|-------|----------|------|-------|----------|------|
| <i>PON1/2/3/4</i>     | rs2158806  | C | A | 0.22 | 2.04  | 4.75E-02 | 1599 | 0.68  | 4.97E-01 | 2691 | 2.17  | 3.04E-02 | 1544 | 2.21  | 2.68E-02 | 2020 | 2.78  | 5.44E-03 | 6255 |
| <i>CETP</i>           | rs158480   | G | A | 0.12 | 1.74  | 4.75E-02 | 1505 | -0.07 | 9.43E-01 | 2204 | 2.06  | 3.92E-02 | 1388 | 2.70  | 6.84E-03 | 1997 | 2.60  | 9.34E-03 | 5589 |
| <i>PON1/2/3/4</i>     | rs854565   | A | G | 0.28 | 1.98  | 4.78E-02 | 1600 | 0.00  | 9.98E-01 | 2693 | 0.75  | 4.52E-01 | 1543 | 0.76  | 4.50E-01 | 2019 | 0.80  | 4.23E-01 | 6255 |
| <i>CD36</i>           | rs3212013  | A | G | 0.04 | -1.99 | 4.80E-02 | 1593 | -0.49 | 6.24E-01 | 2666 | -0.52 | 6.00E-01 | 1542 | 0.05  | 9.61E-01 | 2020 | -0.55 | 5.80E-01 | 6228 |
| <i>PON1/2/3/4</i>     | rs7493     | G | C | 0.22 | 2.03  | 4.87E-02 | 1600 | 0.66  | 5.10E-01 | 2693 | 2.36  | 1.86E-02 | 1543 | 2.20  | 2.81E-02 | 2019 | 2.85  | 4.39E-03 | 6255 |
| <i>PON1/2/3/4</i>     | rs12026    | C | G | 0.22 | 2.03  | 4.87E-02 | 1600 | 0.71  | 4.81E-01 | 2692 | 2.24  | 2.52E-02 | 1542 | 2.21  | 2.68E-02 | 2020 | 2.83  | 4.62E-03 | 6254 |
| <i>ABCG5</i>          | rs1864814  | A | G | 0.04 | 1.98  | 4.89E-02 | 1600 | 1.44  | 1.51E-01 | 2693 | 1.62  | 1.05E-01 | 1544 | -0.42 | 6.71E-01 | 2020 | 1.51  | 1.32E-01 | 6257 |
| <i>LIPC</i>           | rs261342   | G | C | 0.20 | 1.99  | 4.89E-02 | 1594 | 2.18  | 2.94E-02 | 2689 | 3.55  | 3.96E-04 | 1538 | 2.26  | 2.37E-02 | 2020 | 4.47  | 7.70E-06 | 6247 |
| <i>PON1/2/3/4</i>     | rs3757707  | A | G | 0.26 | 2.16  | 4.90E-02 | 1600 | 0.67  | 5.05E-01 | 2693 | 1.26  | 2.09E-01 | 1543 | 1.37  | 1.71E-01 | 2019 | 1.84  | 6.59E-02 | 6255 |
| <i>PPARA</i>          | rs11703495 | A | T | 0.12 | -2.14 | 4.91E-02 | 1600 | -0.79 | 4.30E-01 | 2693 | 0.31  | 7.55E-01 | 1544 | -0.44 | 6.60E-01 | 2020 | -0.61 | 5.40E-01 | 6257 |
| <i>APOA1/A4/A5/C3</i> | rs619054   | A | G | 0.23 | 1.94  | 4.94E-02 | 1586 | 2.06  | 3.94E-02 | 2676 | -0.13 | 8.96E-01 | 1523 | 0.60  | 5.51E-01 | 2018 | 1.63  | 1.04E-01 | 6217 |
| <i>PCSK5</i>          | rs6560494  | C | G | 0.38 | 1.68  | 4.96E-02 | 1600 | 1.38  | 1.69E-01 | 2691 | -1.46 | 1.45E-01 | 1540 | 1.61  | 1.08E-01 | 2018 | 1.09  | 2.74E-01 | 6249 |

A, allele; MAF, Minor allele frequency from Penn-CC; T, T-statistic; P, P-value; Z, Z-statistic; N, Sample size

| Supplemental Table 3. Meta-Analysis SNPs with Suggestive Evidence of Association |            |    |    |      |         |          |      |         |          |      |             |          |      |         |          |      |               |          |      |
|----------------------------------------------------------------------------------|------------|----|----|------|---------|----------|------|---------|----------|------|-------------|----------|------|---------|----------|------|---------------|----------|------|
|                                                                                  |            |    |    |      | Penn-CC |          |      | Penn-RC |          |      | MONICA/KORA |          |      | GRAPHIC |          |      | Meta-analysis |          |      |
| Locus                                                                            | SNP        | A1 | A2 | MAF  | T       | P        | N    | T       | P        | N    | T           | P        | N    | Z       | P        | N    | Z             | P        | N    |
| <i>CETP</i>                                                                      | rs17231506 | A  | G  | 0.30 | 7.57    | 3.82E-14 | 1600 | 6.25    | 4.68E-10 | 2691 | 6.84        | 1.12E-11 | 1536 | 7.83    | 5.00E-15 | 2020 | 14.04         | 8.85E-45 | 7847 |
| <i>CETP</i>                                                                      | rs3764261  | A  | C  | 0.32 | 7.47    | 7.82E-14 | 1600 | 6.15    | 8.94E-10 | 2693 | 6.93        | 6.36E-12 | 1542 | 7.83    | 4.77E-15 | 2019 | 13.98         | 2.15E-44 | 7854 |
| <i>CETP</i>                                                                      | rs1800775  | A  | C  | 0.50 | 7.70    | 1.40E-14 | 1600 | 5.63    | 2.04E-08 | 2693 | 5.82        | 7.14E-09 | 1536 | 6.57    | 4.95E-11 | 2020 | 12.66         | 1.06E-36 | 7849 |
| <i>CETP</i>                                                                      | rs1532624  | A  | C  | 0.41 | 7.35    | 2.03E-13 | 1600 | 4.13    | 3.68E-05 | 2693 | 6.17        | 8.81E-10 | 1543 | 7.01    | 2.43E-12 | 2020 | 12.00         | 3.50E-33 | 7856 |
| <i>CETP</i>                                                                      | rs1532625  | A  | G  | 0.41 | 7.36    | 1.89E-13 | 1549 | 4.14    | 3.65E-05 | 2605 | 5.90        | 4.38E-09 | 1506 | 7.14    | 9.45E-13 | 2017 | 11.97         | 5.24E-33 | 7677 |
| <i>CETP</i>                                                                      | rs711752   | A  | G  | 0.41 | 7.75    | 9.33E-15 | 1600 | 4.23    | 2.44E-05 | 2693 | 5.84        | 6.25E-09 | 1539 | 6.69    | 2.30E-11 | 2019 | 11.93         | 8.02E-33 | 7851 |
| <i>CETP</i>                                                                      | rs708272   | A  | G  | 0.41 | 7.75    | 9.33E-15 | 1600 | 4.23    | 2.44E-05 | 2693 | 5.84        | 6.28E-09 | 1540 | 6.67    | 2.52E-11 | 2020 | 11.93         | 8.73E-33 | 7853 |
| <i>CETP</i>                                                                      | rs1864163  | A  | G  | 0.25 | -7.68   | 1.66E-14 | 1598 | -4.68   | 3.05E-06 | 2692 | -6.37       | 2.48E-10 | 1541 | -5.68   | 1.32E-08 | 2020 | -11.88        | 1.47E-32 | 7851 |
| <i>CETP</i>                                                                      | rs12720922 | A  | G  | 0.19 | -7.52   | 5.63E-14 | 1600 | -5.76   | 9.57E-09 | 2693 | -5.36       | 9.56E-08 | 1540 | -5.25   | 1.50E-07 | 2019 | -11.78        | 4.98E-32 | 7852 |
| <i>CETP</i>                                                                      | rs7499892  | A  | G  | 0.19 | -7.77   | 8.01E-15 | 1600 | -5.73   | 1.10E-08 | 2693 | -5.21       | 2.18E-07 | 1542 | -5.17   | 2.36E-07 | 2018 | -11.77        | 5.63E-32 | 7853 |
| <i>CETP</i>                                                                      | rs11508026 | A  | G  | 0.40 | 7.46    | 8.65E-14 | 1600 | 4.07    | 4.93E-05 | 2690 | 5.76        | 1.00E-08 | 1534 | 6.61    | 3.80E-11 | 2020 | 11.64         | 2.72E-31 | 7844 |
| <i>CETP</i>                                                                      | rs11076175 | G  | A  | 0.18 | -7.81   | 5.55E-15 | 1597 | -5.62   | 2.10E-08 | 2692 | -5.05       | 5.07E-07 | 1538 | -5.06   | 4.26E-07 | 2018 | -11.60        | 4.26E-31 | 7845 |
| <i>CETP</i>                                                                      | rs7203984  | C  | A  | 0.22 | -7.52   | 5.41E-14 | 1600 | -5.48   | 4.74E-08 | 2693 | -4.90       | 1.08E-06 | 1539 | -4.73   | 2.25E-06 | 2019 | -11.15        | 7.05E-29 | 7851 |
| <i>CETP</i>                                                                      | rs9939224  | A  | C  | 0.21 | -7.40   | 1.37E-13 | 1600 | -5.66   | 1.65E-08 | 2693 | -4.94       | 8.66E-07 | 1541 | -3.97   | 7.27E-05 | 2020 | -10.84        | 2.31E-27 | 7854 |
| <i>CETP</i>                                                                      | rs11076176 | C  | A  | 0.19 | -6.33   | 2.41E-10 | 1599 | -4.68   | 2.98E-06 | 2692 | -4.74       | 2.34E-06 | 1537 | -5.08   | 3.79E-07 | 2019 | -10.26        | 1.05E-24 | 7847 |
| <i>CETP</i>                                                                      | rs289714   | G  | A  | 0.21 | -6.28   | 3.30E-10 | 1600 | -4.71   | 2.57E-06 | 2693 | -4.12       | 3.92E-05 | 1540 | -4.72   | 2.35E-06 | 2019 | -9.81         | 1.07E-22 | 7852 |
| <i>CETP</i>                                                                      | rs12708967 | G  | A  | 0.19 | -3.42   | 6.38E-04 | 1600 | -2.63   | 8.60E-03 | 2687 | -4.42       | 1.07E-05 | 1544 | -5.02   | 5.19E-07 | 2019 | -7.58         | 3.54E-14 | 7850 |
| <i>CETP</i>                                                                      | rs12720918 | G  | A  | 0.28 | -2.64   | 8.21E-03 | 1599 | -3.56   | 3.74E-04 | 2693 | -3.77       | 1.69E-04 | 1543 | -4.68   | 2.86E-06 | 2020 | -7.32         | 2.55E-13 | 7855 |
| <i>CETP</i>                                                                      | rs4783961  | A  | G  | 0.50 | 4.52    | 6.26E-06 | 1600 | 3.76    | 1.72E-04 | 2691 | 2.78        | 5.44E-03 | 1537 | 3.43    | 6.03E-04 | 2020 | 7.21          | 5.59E-13 | 7848 |
| <i>LPL</i>                                                                       | rs264      | A  | G  | 0.15 | 3.57    | 3.60E-04 | 1599 | 3.54    | 4.13E-04 | 2691 | 2.73        | 6.39E-03 | 1543 | 3.63    | 2.87E-04 | 2019 | 6.73          | 1.75E-11 | 7852 |
| <i>LPL</i>                                                                       | rs12679834 | G  | A  | 0.10 | 4.15    | 3.32E-05 | 1598 | 3.12    | 1.83E-03 | 2691 | 3.08        | 2.10E-03 | 1538 | 3.22    | 1.28E-03 | 2013 | 6.69          | 2.18E-11 | 7840 |
| <i>LPL</i>                                                                       | rs328      | G  | C  | 0.10 | 4.27    | 1.99E-05 | 1600 | 3.20    | 1.42E-03 | 2693 | 2.91        | 3.62E-03 | 1544 | 3.14    | 1.68E-03 | 2020 | 6.68          | 2.45E-11 | 7857 |



|            |            |   |   |      |       |          |      |       |          |      |       |          |      |       |          |      |       |          |      |
|------------|------------|---|---|------|-------|----------|------|-------|----------|------|-------|----------|------|-------|----------|------|-------|----------|------|
| LPL        | rs256      | A | G | 0.14 | 3.49  | 4.77E-04 | 1600 | 3.32  | 8.98E-04 | 2693 | 2.88  | 3.99E-03 | 1543 | 3.63  | 2.82E-04 | 2020 | 6.64  | 3.18E-11 | 7856 |
| LPL        | rs3208305  | T | A | 0.32 | 4.87  | 1.14E-06 | 1593 | 3.19  | 1.42E-03 | 2675 | 2.27  | 2.31E-02 | 1530 | 2.99  | 2.77E-03 | 2019 | 6.59  | 4.43E-11 | 7817 |
| LPL        | rs13702    | G | A | 0.33 | 4.85  | 1.25E-06 | 1599 | 3.16  | 1.58E-03 | 2693 | 2.26  | 2.43E-02 | 1543 | 3.01  | 2.62E-03 | 2020 | 6.56  | 5.34E-11 | 7855 |
| CETP       | rs1800777  | A | G | 0.03 | -2.92 | 3.49E-03 | 1599 | -3.65 | 2.68E-04 | 2692 | -4.28 | 2.00E-05 | 1541 | -2.38 | 1.74E-02 | 2020 | -6.55 | 5.84E-11 | 7852 |
| CETP       | rs5880     | C | G | 0.04 | -2.53 | 1.13E-02 | 1600 | -4.15 | 3.50E-05 | 2693 | -4.18 | 3.04E-05 | 1544 | -2.22 | 2.67E-02 | 2020 | -6.54 | 6.24E-11 | 7857 |
| LPL        | rs263      | A | G | 0.20 | 4.25  | 2.17E-05 | 1600 | 3.15  | 1.67E-03 | 2693 | 2.67  | 7.62E-03 | 1541 | 3.01  | 2.62E-03 | 2020 | 6.47  | 1.01E-10 | 7854 |
| LPL        | rs331      | A | G | 0.28 | 3.70  | 2.20E-04 | 1600 | 3.28  | 1.04E-03 | 2693 | 2.01  | 4.48E-02 | 1539 | 3.41  | 6.45E-04 | 2020 | 6.21  | 5.40E-10 | 7852 |
| LPL        | rs3916027  | A | G | 0.28 | 3.79  | 1.50E-04 | 1596 | 3.26  | 1.13E-03 | 2692 | 2.03  | 4.30E-02 | 1533 | 3.32  | 9.11E-04 | 2012 | 6.20  | 5.77E-10 | 7833 |
| LPL        | rs301      | G | A | 0.25 | 4.27  | 2.00E-05 | 1597 | 3.67  | 2.43E-04 | 2693 | 1.26  | 2.07E-01 | 1541 | 3.06  | 2.21E-03 | 2019 | 6.18  | 6.26E-10 | 7850 |
| LPL        | rs3779788  | A | G | 0.14 | 4.03  | 5.71E-05 | 1600 | 2.78  | 5.45E-03 | 2693 | 2.91  | 3.65E-03 | 1543 | 2.83  | 4.67E-03 | 2020 | 6.17  | 6.99E-10 | 7856 |
| LPL        | rs3735964  | A | C | 0.10 | 3.97  | 7.10E-05 | 1600 | 2.97  | 3.02E-03 | 2693 | 2.09  | 3.69E-02 | 1543 | 3.34  | 8.40E-04 | 2019 | 6.15  | 7.87E-10 | 7855 |
| LPL        | rs255      | G | A | 0.16 | 3.21  | 1.34E-03 | 1600 | 3.42  | 6.48E-04 | 2693 | 2.10  | 3.57E-02 | 1542 | 3.27  | 1.06E-03 | 2020 | 6.04  | 1.59E-09 | 7855 |
| LPL        | rs271      | A | G | 0.15 | 3.28  | 1.06E-03 | 1600 | 2.99  | 2.83E-03 | 2693 | 2.29  | 2.21E-02 | 1541 | 3.36  | 7.88E-04 | 2018 | 5.94  | 2.80E-09 | 7852 |
| LPL        | rs327      | C | A | 0.29 | 3.24  | 1.19E-03 | 1599 | 3.49  | 4.94E-04 | 2681 | 1.69  | 9.22E-02 | 1525 | 3.25  | 1.16E-03 | 2020 | 5.90  | 3.67E-09 | 7825 |
| LPL        | rs320      | C | A | 0.29 | 3.44  | 5.85E-04 | 1596 | 3.41  | 6.67E-04 | 2690 | 1.63  | 1.03E-01 | 1530 | 3.18  | 1.49E-03 | 2019 | 5.88  | 4.12E-09 | 7835 |
| LIPG       | rs2156552  | A | T | 0.14 | -4.07 | 4.80E-05 | 1600 | -2.30 | 2.16E-02 | 2693 | -0.95 | 3.40E-01 | 1543 | -3.37 | 7.48E-04 | 2020 | -5.31 | 1.09E-07 | 7856 |
| CETP       | rs4784745  | G | A | 0.32 | -3.74 | 1.83E-04 | 1600 | -0.16 | 8.76E-01 | 2693 | -2.13 | 3.36E-02 | 1544 | -5.09 | 3.53E-07 | 2019 | -5.30 | 1.14E-07 | 7856 |
| LIPG       | rs1943981  | T | A | 0.14 | -4.10 | 4.19E-05 | 1600 | -2.32 | 2.04E-02 | 2693 | -0.87 | 3.86E-01 | 1544 | -3.37 | 7.63E-04 | 2020 | -5.30 | 1.18E-07 | 7857 |
| APOE/C1/C2 | rs2075650  | G | A | 0.13 | -2.34 | 1.93E-02 | 1600 | -4.15 | 3.46E-05 | 2693 | -2.31 | 2.12E-02 | 1544 | -1.36 | 1.73E-01 | 2020 | -5.19 | 2.07E-07 | 7857 |
| CETP       | rs4784744  | A | G | 0.33 | -3.44 | 5.86E-04 | 1600 | -0.10 | 9.20E-01 | 2693 | -2.10 | 3.60E-02 | 1544 | -5.11 | 3.25E-07 | 2020 | -5.13 | 2.90E-07 | 7857 |
| APOE/C1/C2 | rs12721046 | A | G | 0.12 | -3.65 | 2.61E-04 | 1597 | -3.65 | 2.63E-04 | 2676 | -1.36 | 1.75E-01 | 1522 | -1.28 | 2.00E-01 | 2019 | -5.04 | 4.76E-07 | 7814 |
| CETP       | rs291044   | A | G | 0.33 | -3.37 | 7.41E-04 | 1600 | -0.08 | 9.39E-01 | 2693 | -1.91 | 5.64E-02 | 1542 | -5.02 | 5.25E-07 | 2020 | -4.96 | 7.17E-07 | 7855 |
| CETP       | rs289717   | A | G | 0.33 | -3.48 | 4.99E-04 | 1600 | -0.02 | 9.88E-01 | 2693 | -1.94 | 5.21E-02 | 1537 | -4.92 | 8.69E-07 | 2020 | -4.94 | 8.00E-07 | 7850 |
| FADS1/2/3  | rs174570   | A | G | 0.11 | -2.95 | 3.22E-03 | 1600 | -2.92 | 3.52E-03 | 2693 | -2.65 | 8.16E-03 | 1543 | -1.41 | 1.58E-01 | 2020 | -4.93 | 8.37E-07 | 7856 |
| FADS1/2/3  | rs1535     | G | A | 0.30 | -3.21 | 1.34E-03 | 1600 | -2.78 | 5.41E-03 | 2693 | -0.81 | 4.18E-01 | 1537 | -2.92 | 3.49E-03 | 2020 | -4.92 | 8.78E-07 | 7850 |
| FADS1/2/3  | rs174577   | A | C | 0.35 | -3.61 | 3.03E-04 | 1520 | -2.36 | 1.85E-02 | 2633 | -1.05 | 2.92E-01 | 1364 | -2.76 | 5.78E-03 | 2020 | -4.89 | 1.00E-06 | 7537 |
| LIPC       | rs588136   | G | A | 0.22 | 2.36  | 1.83E-02 | 1585 | 2.10  | 3.63E-02 | 2670 | 3.38  | 7.58E-04 | 1531 | 2.19  | 2.89E-02 | 2020 | -4.89 | 1.01E-06 | 7806 |

|           |            |   |   |      |       |          |      |       |          |      |       |          |      |       |          |      |       |          |      |
|-----------|------------|---|---|------|-------|----------|------|-------|----------|------|-------|----------|------|-------|----------|------|-------|----------|------|
| LIPC      | rs261342   | G | C | 0.25 | 1.99  | 4.72E-02 | 1594 | 2.18  | 2.94E-02 | 2689 | 3.55  | 3.96E-04 | 1538 | 2.26  | 2.37E-02 | 2020 | 4.89  | 1.02E-06 | 7841 |
| LIPC      | rs2070895  | A | G | 0.23 | 2.60  | 9.35E-03 | 1600 | 1.56  | 1.18E-01 | 2693 | 3.48  | 5.16E-04 | 1541 | 2.43  | 1.50E-02 | 2020 | 4.86  | 1.17E-06 | 7854 |
| LIPC      | rs1800588  | A | G | 0.23 | 2.54  | 1.11E-02 | 1600 | 1.33  | 1.85E-01 | 2692 | 3.46  | 5.64E-04 | 1541 | 2.62  | 8.70E-03 | 2019 | 4.78  | 1.75E-06 | 7852 |
| CETP      | rs5882     | G | A | 0.34 | 4.11  | 4.02E-05 | 1600 | 0.09  | 9.24E-01 | 2693 | 2.94  | 3.36E-03 | 1543 | 3.10  | 1.95E-03 | 2019 | 4.78  | 1.76E-06 | 7855 |
| LIPC      | rs261332   | A | G | 0.19 | 2.61  | 9.11E-03 | 1600 | 1.33  | 1.82E-01 | 2692 | 3.54  | 4.16E-04 | 1544 | 2.47  | 1.34E-02 | 2019 | 4.78  | 1.79E-06 | 7855 |
| LPL       | rs343      | A | C | 0.09 | 3.18  | 1.46E-03 | 1595 | 2.19  | 2.90E-02 | 2683 | 1.58  | 1.14E-01 | 1538 | 2.54  | 1.11E-02 | 2019 | 4.70  | 2.57E-06 | 7835 |
| CETP      | rs289743   | G | A | 0.33 | 4.47  | 7.94E-06 | 1585 | -0.46 | 6.43E-01 | 2593 | 3.12  | 1.84E-03 | 1519 | 3.05  | 2.33E-03 | 2016 | 4.70  | 2.66E-06 | 7713 |
| LIPC      | rs8033940  | A | G | 0.32 | 2.51  | 1.21E-02 | 1598 | 1.43  | 1.53E-01 | 2690 | 3.61  | 3.20E-04 | 1543 | 2.16  | 3.11E-02 | 2020 | 4.66  | 3.19E-06 | 7851 |
| CETP      | rs289718   | G | A | 0.32 | 4.40  | 1.06E-05 | 1598 | -0.19 | 8.50E-01 | 2689 | 2.88  | 4.01E-03 | 1536 | 2.93  | 3.38E-03 | 2017 | 4.64  | 3.51E-06 | 7840 |
| CETP      | rs289719   | A | G | 0.32 | 4.38  | 1.21E-05 | 1599 | -0.26 | 7.95E-01 | 2693 | 2.95  | 3.22E-03 | 1539 | 2.93  | 3.42E-03 | 2018 | 4.61  | 4.00E-06 | 7849 |
| CETP      | rs12597002 | A | C | 0.29 | -2.87 | 4.15E-03 | 1600 | -1.34 | 1.80E-01 | 2693 | -1.69 | 9.18E-02 | 1544 | -3.49 | 4.80E-04 | 2020 | -4.60 | 4.30E-06 | 7857 |
| CETP      | rs6499863  | A | G | 0.16 | -4.37 | 1.27E-05 | 1600 | -0.81 | 4.16E-01 | 2693 | -3.00 | 2.74E-03 | 1542 | -1.55 | 1.21E-01 | 2020 | -4.56 | 5.14E-06 | 7855 |
| LPL       | rs268      | G | A | 0.01 | -3.48 | 5.11E-04 | 1600 | -1.69 | 9.17E-02 | 2693 | -3.95 | 8.30E-05 | 1543 | -0.49 | 6.23E-01 | 2019 | -4.55 | 5.38E-06 | 7855 |
| CETP      | rs12720889 | A | T | 0.29 | 4.68  | 2.93E-06 | 1596 | -0.12 | 9.01E-01 | 2683 | 2.42  | 1.58E-02 | 1486 | 2.85  | 4.40E-03 | 2017 | 4.55  | 5.39E-06 | 7782 |
| FADS1/2/3 | rs174535   | G | A | 0.31 | -2.76 | 5.80E-03 | 1598 | -2.33 | 2.01E-02 | 2693 | -0.92 | 3.56E-01 | 1542 | -3.00 | 2.73E-03 | 2020 | 4.53  | 5.78E-06 | 7853 |
| LIPC      | rs8034802  | A | T | 0.29 | 2.51  | 1.21E-02 | 1599 | 1.20  | 2.30E-01 | 2692 | 3.33  | 8.78E-04 | 1541 | 2.31  | 2.07E-02 | 2017 | 4.48  | 7.36E-06 | 7849 |
| FADS1/2/3 | rs174601   | A | G | 0.37 | -3.35 | 8.12E-04 | 1599 | -2.12 | 3.44E-02 | 2689 | -0.80 | 4.26E-01 | 1543 | -2.68 | 7.34E-03 | 2020 | -4.46 | 8.11E-06 | 7851 |
| LIPC      | rs11635491 | A | G | 0.26 | 2.72  | 6.49E-03 | 1596 | 1.43  | 1.53E-01 | 2688 | 2.83  | 4.73E-03 | 1524 | 2.22  | 2.67E-02 | 2011 | 4.44  | 9.07E-06 | 7819 |
| FADS1/2/3 | rs174576   | A | C | 0.32 | -2.99 | 2.82E-03 | 1600 | -2.44 | 1.48E-02 | 2693 | -0.59 | 5.58E-01 | 1544 | -2.76 | 5.78E-03 | 2020 | -4.43 | 9.28E-06 | 7857 |
| CETP      | rs289716   | T | A | 0.32 | 4.32  | 1.58E-05 | 1600 | -0.27 | 7.86E-01 | 2693 | 2.67  | 7.70E-03 | 1537 | 2.85  | 4.40E-03 | 2020 | 4.41  | 1.01E-05 | 7850 |
| CETP      | rs708273   | A | G | 0.28 | -2.60 | 9.44E-03 | 1599 | -1.40 | 1.63E-01 | 2693 | -1.34 | 1.79E-01 | 1394 | -3.52 | 4.24E-04 | 2019 | -4.38 | 1.17E-05 | 7705 |
| LIPC      | rs261338   | A | G | 0.17 | 1.46  | 1.45E-01 | 1600 | 1.92  | 5.51E-02 | 2693 | 3.59  | 3.46E-04 | 1544 | 1.97  | 4.89E-02 | 2020 | 4.37  | 1.27E-05 | 7857 |
| CETP      | rs6499861  | G | C | 0.16 | -4.11 | 4.03E-05 | 1600 | -0.58 | 5.64E-01 | 2693 | -2.81 | 4.99E-03 | 1543 | -1.73 | 8.43E-02 | 2020 | -4.31 | 1.63E-05 | 7856 |
| LIPG      | rs77960347 | G | A | 0.01 | 3.34  | 8.42E-04 | 1600 | 2.93  | 3.38E-03 | 2693 | -0.21 | 8.30E-01 | 1544 | 2.15  | 3.17E-02 | 2020 | 4.22  | 2.48E-05 | 7857 |
| LIPC      | rs261341   | A | G | 0.34 | 1.72  | 8.63E-02 | 1600 | 1.35  | 1.78E-01 | 2693 | 3.26  | 1.15E-03 | 1542 | 2.38  | 1.73E-02 | 2019 | 4.21  | 2.55E-05 | 7854 |
| FADS1/2/3 | rs102275   | G | A | 0.35 | -2.44 | 1.47E-02 | 1600 | -2.19 | 2.88E-02 | 2693 | -0.75 | 4.54E-01 | 1541 | -2.91 | 3.64E-03 | 2020 | -4.19 | 2.82E-05 | 7854 |
| CETP      | rs289742   | C | G | 0.14 | 2.48  | 1.30E-02 | 1600 | 0.13  | 9.01E-01 | 2692 | 3.44  | 5.93E-04 | 1543 | 2.74  | 6.05E-03 | 2020 | 4.11  | 3.99E-05 | 7855 |

|                       |            |   |   |      |       |          |      |       |          |      |       |          |      |       |          |      |       |          |      |
|-----------------------|------------|---|---|------|-------|----------|------|-------|----------|------|-------|----------|------|-------|----------|------|-------|----------|------|
| <i>LIPC</i>           | rs261336   | G | A | 0.17 | 1.55  | 1.21E-01 | 1600 | 2.32  | 2.03E-02 | 2693 | 2.93  | 3.45E-03 | 1544 | 1.40  | 1.62E-01 | 2020 | 4.07  | 4.81E-05 | 7857 |
| <i>APOA1/A4/A5/C3</i> | rs12287066 | A | C | 0.08 | -2.81 | 5.03E-03 | 1600 | -2.05 | 4.03E-02 | 2691 | -1.61 | 1.07E-01 | 1540 | -1.65 | 9.89E-02 | 2019 | -4.02 | 5.87E-05 | 7850 |
| <i>FADS1/2/3</i>      | rs2072114  | G | A | 0.12 | -2.87 | 4.06E-03 | 1600 | -1.79 | 7.36E-02 | 2693 | -1.37 | 1.70E-01 | 1537 | -2.09 | 3.67E-02 | 2020 | -4.01 | 6.02E-05 | 7850 |
| <i>CETP</i>           | rs12447924 | G | A | 0.24 | -2.13 | 3.31E-02 | 1597 | -2.25 | 2.48E-02 | 2684 | -0.72 | 4.69E-01 | 1538 | -2.78 | 5.39E-03 | 2020 | -4.01 | 6.10E-05 | 7839 |
| <i>ABCG1</i>          | rs914189   | C | G | 0.21 | 2.34  | 1.93E-02 | 1600 | 2.78  | 5.50E-03 | 2693 | 1.20  | 2.29E-01 | 1544 | 1.51  | 1.32E-01 | 2020 | 3.98  | 6.97E-05 | 7857 |
| <i>APOB</i>           | rs1801695  | A | G | 0.03 | 2.87  | 4.05E-03 | 1600 | 2.72  | 6.59E-03 | 2693 | 0.50  | 6.14E-01 | 1544 | 1.65  | 9.80E-02 | 2020 | 3.95  | 7.80E-05 | 7857 |
| <i>LPL</i>            | rs10104051 | A | G | 0.44 | 3.20  | 1.36E-03 | 1598 | 1.44  | 1.51E-01 | 2689 | 1.65  | 9.91E-02 | 1540 | 1.80  | 7.11E-02 | 2020 | 3.93  | 8.41E-05 | 7847 |
| <i>ABCG1</i>          | rs4148139  | A | G | 0.20 | 2.46  | 1.40E-02 | 1600 | 2.84  | 4.57E-03 | 2693 | 0.95  | 3.41E-01 | 1543 | 1.46  | 1.44E-01 | 2020 | 3.93  | 8.43E-05 | 7856 |
| <i>APOA1/A4/A5/C3</i> | rs12285095 | C | A | 0.07 | -2.85 | 4.39E-03 | 1600 | -2.04 | 4.14E-02 | 2693 | -1.42 | 1.56E-01 | 1544 | -1.61 | 1.08E-01 | 2020 | -3.92 | 8.69E-05 | 7857 |
| <i>CETP</i>           | rs736274   | T | A | 0.11 | 2.65  | 8.01E-03 | 1600 | 0.01  | 9.94E-01 | 2691 | 2.83  | 4.68E-03 | 1542 | 2.88  | 4.04E-03 | 2020 | 3.91  | 9.11E-05 | 7853 |
| <i>LPL</i>            | rs7009128  | G | A | 0.04 | -2.73 | 6.34E-03 | 1600 | -1.83 | 6.68E-02 | 2693 | -1.01 | 3.13E-01 | 1543 | -2.24 | 2.49E-02 | 2020 | -3.89 | 1.00E-04 | 7856 |
| <i>CETP</i>           | rs11076174 | G | A | 0.09 | -4.49 | 7.12E-06 | 1600 | -2.37 | 1.80E-02 | 2693 | -1.46 | 1.44E-01 | 1543 | 0.35  | 7.30E-01 | 2020 | -3.88 | 1.03E-04 | 7856 |
| <i>FADS1/2/3</i>      | rs174548   | C | G | 0.28 | -2.91 | 3.63E-03 | 1600 | -1.86 | 6.32E-02 | 2692 | 0.01  | 9.92E-01 | 1542 | -2.92 | 3.50E-03 | 2019 | -3.88 | 1.06E-04 | 7853 |
| <i>CETP</i>           | rs12447839 | G | A | 0.22 | -2.05 | 4.02E-02 | 1585 | -2.18 | 2.97E-02 | 2587 | -0.62 | 5.34E-01 | 1540 | -2.75 | 5.93E-03 | 2016 | -3.87 | 1.09E-04 | 7728 |
| <i>LIPC</i>           | rs485538   | G | A | 0.18 | 1.93  | 5.31E-02 | 1600 | 1.81  | 7.04E-02 | 2693 | 2.70  | 6.92E-03 | 1540 | 1.31  | 1.89E-01 | 2020 | 3.80  | 1.48E-04 | 7853 |
| <i>CETP</i>           | rs4783962  | A | G | 0.22 | -2.00 | 4.61E-02 | 1600 | -2.18 | 2.96E-02 | 2693 | -0.66 | 5.09E-01 | 1540 | -2.61 | 9.14E-03 | 2019 | -3.79 | 1.51E-04 | 7852 |
| <i>LPL</i>            | rs28645722 | A | G | 0.03 | -2.73 | 6.32E-03 | 1600 | -1.45 | 1.47E-01 | 2693 | -1.28 | 2.01E-01 | 1504 | -2.24 | 2.52E-02 | 2019 | -3.79 | 1.54E-04 | 7816 |
| <i>CETP</i>           | rs4587963  | A | T | 0.22 | -1.95 | 5.12E-02 | 1597 | -2.28 | 2.29E-02 | 2686 | -0.33 | 7.40E-01 | 1533 | -2.80 | 5.16E-03 | 2019 | -3.78 | 1.57E-04 | 7835 |
| <i>ABCA1</i>          | rs3905001  | G | C | 0.28 | 1.53  | 1.27E-01 | 1598 | 1.74  | 8.17E-02 | 2693 | 1.85  | 6.52E-02 | 1540 | 2.43  | 1.51E-02 | 2020 | 3.76  | 1.71E-04 | 7851 |
| <i>LPL</i>            | rs28575919 | C | G | 0.04 | -2.67 | 7.56E-03 | 1600 | -1.59 | 1.12E-01 | 2693 | -1.17 | 2.43E-01 | 1544 | -2.18 | 2.94E-02 | 2020 | -3.76 | 1.72E-04 | 7857 |
| <i>LPL</i>            | rs1470186  | G | A | 0.03 | -2.73 | 6.34E-03 | 1600 | -1.65 | 9.82E-02 | 2693 | -1.01 | 3.11E-01 | 1544 | -2.18 | 2.96E-02 | 2019 | -3.75 | 1.75E-04 | 7856 |
| <i>LPL</i>            | rs6999612  | G | A | 0.04 | -2.74 | 6.15E-03 | 1600 | -1.40 | 1.63E-01 | 2693 | -1.32 | 1.86E-01 | 1543 | -2.18 | 2.94E-02 | 2020 | -3.75 | 1.81E-04 | 7856 |
| <i>LPL</i>            | rs17091742 | A | G | 0.03 | -2.73 | 6.34E-03 | 1600 | -1.60 | 1.11E-01 | 2693 | -1.03 | 3.02E-01 | 1544 | -2.17 | 2.96E-02 | 2020 | -3.73 | 1.95E-04 | 7857 |
| <i>LPL</i>            | rs28445964 | G | A | 0.03 | -2.82 | 4.85E-03 | 1600 | -1.51 | 1.32E-01 | 2693 | -1.03 | 3.04E-01 | 1543 | -2.18 | 2.94E-02 | 2020 | -3.71 | 2.05E-04 | 7856 |
| <i>GPR109A/B/81</i>   | rs3922628  | T | A | 0.22 | 2.61  | 8.97E-03 | 1597 | 1.13  | 2.58E-01 | 2684 | 0.56  | 5.73E-01 | 1434 | 3.12  | 1.81E-03 | 2017 | 3.69  | 2.23E-04 | 7732 |
| <i>LPL</i>            | rs28615996 | G | A | 0.04 | -2.73 | 6.32E-03 | 1600 | -1.53 | 1.26E-01 | 2693 | -1.03 | 3.02E-01 | 1544 | -2.18 | 2.94E-02 | 2020 | -3.69 | 2.24E-04 | 7857 |
| <i>LPL</i>            | rs7016529  | G | A | 0.04 | -2.67 | 7.56E-03 | 1600 | -1.59 | 1.12E-01 | 2693 | -1.01 | 3.13E-01 | 1543 | -2.18 | 2.94E-02 | 2020 | -3.69 | 2.27E-04 | 7856 |

|                       |            |   |   |      |       |          |      |       |          |      |       |          |      |       |          |      |       |          |      |
|-----------------------|------------|---|---|------|-------|----------|------|-------|----------|------|-------|----------|------|-------|----------|------|-------|----------|------|
| <i>FADS1/2/3</i>      | rs2524299  | T | A | 0.12 | -2.74 | 6.19E-03 | 1598 | -1.29 | 1.98E-01 | 2691 | -1.40 | 1.61E-01 | 1542 | -2.03 | 4.24E-02 | 2019 | -3.64 | 2.74E-04 | 7850 |
| <i>LPL</i>            | rs7000460  | C | A | 0.04 | -2.73 | 6.32E-03 | 1600 | -1.45 | 1.47E-01 | 2693 | -1.01 | 3.13E-01 | 1542 | -2.18 | 2.94E-02 | 2019 | -3.63 | 2.81E-04 | 7854 |
| <i>LPL</i>            | rs1534649  | A | C | 0.45 | 3.31  | 9.50E-04 | 1594 | 1.33  | 1.83E-01 | 2578 | 1.16  | 2.48E-01 | 1532 | 1.63  | 1.03E-01 | 2019 | 3.62  | 2.96E-04 | 7723 |
| <i>LIPC</i>           | rs485671   | A | C | 0.17 | 1.77  | 7.68E-02 | 1600 | 1.54  | 1.25E-01 | 2693 | 2.85  | 4.45E-03 | 1543 | 1.30  | 1.95E-01 | 2020 | 3.62  | 3.00E-04 | 7856 |
| <i>ABCA1</i>          | rs1883025  | A | G | 0.27 | -2.45 | 1.41E-02 | 1599 | -1.37 | 1.71E-01 | 2693 | -0.85 | 3.94E-01 | 1544 | -2.62 | 8.86E-03 | 2020 | -3.61 | 3.02E-04 | 7856 |
| <i>ABCA1</i>          | rs13284054 | G | A | 0.13 | -2.04 | 4.17E-02 | 1579 | -1.44 | 1.52E-01 | 2661 | -2.39 | 1.70E-02 | 1537 | -1.53 | 1.27E-01 | 2017 | -3.59 | 3.28E-04 | 7794 |
| <i>LPL</i>            | rs3289     | G | A | 0.03 | -2.30 | 2.16E-02 | 1600 | -2.23 | 2.58E-02 | 2692 | -1.51 | 1.32E-01 | 1542 | -1.08 | 2.81E-01 | 2020 | -3.56 | 3.75E-04 | 7854 |
| <i>CETP</i>           | rs289715   | A | T | 0.12 | 2.27  | 2.35E-02 | 1600 | 0.03  | 9.77E-01 | 2693 | 2.65  | 8.07E-03 | 1543 | 2.63  | 8.61E-03 | 2020 | 3.55  | 3.91E-04 | 7856 |
| <i>SCARB1</i>         | rs838878   | A | G | 0.34 | 1.82  | 6.93E-02 | 1600 | 1.70  | 8.85E-02 | 2693 | 1.94  | 5.23E-02 | 1543 | 1.59  | 1.12E-01 | 2020 | 3.48  | 4.94E-04 | 7856 |
| <i>APOA1/A4/A5/C3</i> | rs12286037 | A | G | 0.08 | -2.33 | 1.99E-02 | 1600 | -2.08 | 3.75E-02 | 2693 | -1.36 | 1.74E-01 | 1543 | -1.19 | 2.36E-01 | 2018 | -3.47 | 5.15E-04 | 7854 |
| <i>PON1/2/3/4</i>     | rs7493     | G | C | 0.24 | 2.03  | 4.22E-02 | 1600 | 0.66  | 5.10E-01 | 2693 | 2.36  | 1.86E-02 | 1543 | 2.20  | 2.81E-02 | 2019 | 3.46  | 5.42E-04 | 7855 |
| <i>PON1/2/3/4</i>     | rs12026    | C | G | 0.24 | 2.03  | 4.22E-02 | 1600 | 0.71  | 4.81E-01 | 2692 | 2.24  | 2.52E-02 | 1542 | 2.21  | 2.68E-02 | 2020 | 3.45  | 5.72E-04 | 7854 |
| <i>CETP</i>           | rs5883     | A | G | 0.06 | 3.92  | 8.77E-05 | 1600 | 2.49  | 1.29E-02 | 2693 | -0.70 | 4.87E-01 | 1531 | 1.02  | 3.07E-01 | 2019 | 3.44  | 5.81E-04 | 7843 |
| <i>ABCA1</i>          | rs3847300  | A | G | 0.13 | -2.11 | 3.49E-02 | 1505 | -0.95 | 3.41E-01 | 2632 | -2.45 | 1.46E-02 | 1495 | -1.66 | 9.75E-02 | 2018 | -3.43 | 6.13E-04 | 7650 |
| <i>PON1/2/3/4</i>     | rs2158806  | C | A | 0.24 | 2.04  | 4.10E-02 | 1599 | 0.68  | 4.97E-01 | 2691 | 2.17  | 3.04E-02 | 1544 | 2.21  | 2.68E-02 | 2020 | 3.40  | 6.67E-04 | 7854 |
| <i>NFKB1</i>          | rs3774964  | G | A | 0.36 | 2.62  | 8.90E-03 | 1600 | 2.03  | 4.30E-02 | 2693 | -0.06 | 9.55E-01 | 1539 | 2.05  | 4.00E-02 | 2020 | 3.38  | 7.19E-04 | 7852 |
| <i>LPL</i>            | rs258      | G | C | 0.47 | 2.43  | 1.50E-02 | 1600 | 1.34  | 1.81E-01 | 2693 | 1.95  | 5.16E-02 | 1540 | 1.25  | 2.11E-01 | 2018 | 3.38  | 7.28E-04 | 7851 |
| <i>ABCA1</i>          | rs3890182  | A | G | 0.12 | -1.94 | 5.27E-02 | 1600 | -0.89 | 3.75E-01 | 2692 | -2.51 | 1.21E-02 | 1543 | -1.72 | 8.56E-02 | 2020 | -3.38 | 7.33E-04 | 7855 |
| <i>LIPC</i>           | rs473224   | A | C | 0.14 | 1.61  | 1.07E-01 | 1600 | 1.15  | 2.49E-01 | 2693 | 3.11  | 1.90E-03 | 1544 | 1.16  | 2.47E-01 | 2020 | 3.37  | 7.58E-04 | 7857 |
| <i>LPL</i>            | rs285      | A | G | 0.50 | 2.45  | 1.43E-02 | 1600 | 1.52  | 1.29E-01 | 2692 | 1.84  | 6.67E-02 | 1542 | 1.11  | 2.69E-01 | 2020 | 3.37  | 7.61E-04 | 7854 |
| <i>PCSK6</i>          | rs1471656  | A | G | 0.45 | 2.02  | 4.31E-02 | 1600 | 1.35  | 1.77E-01 | 2693 | 2.39  | 1.72E-02 | 1538 | 1.19  | 2.35E-01 | 2020 | 3.36  | 7.75E-04 | 7851 |
| <i>ABCA1</i>          | rs13290420 | G | A | 0.14 | -1.97 | 4.88E-02 | 1600 | -0.81 | 4.17E-01 | 2693 | -2.62 | 8.88E-03 | 1544 | -1.64 | 1.02E-01 | 2020 | -3.35 | 7.96E-04 | 7857 |
| <i>GPR109A/B/81</i>   | rs4759361  | T | A | 0.19 | 2.13  | 3.32E-02 | 1600 | 1.87  | 6.16E-02 | 2691 | 0.16  | 8.72E-01 | 1542 | 2.38  | 1.72E-02 | 2019 | 3.34  | 8.52E-04 | 7852 |
| <i>LPL</i>            | rs1800590  | C | A | 0.05 | -2.44 | 1.47E-02 | 1600 | -0.83 | 4.04E-01 | 2692 | -1.31 | 1.92E-01 | 1544 | -2.25 | 2.47E-02 | 2019 | -3.31 | 9.43E-04 | 7855 |
| <i>GPR109A/B/81</i>   | rs579935   | A | C | 0.20 | 2.14  | 3.23E-02 | 1579 | 1.81  | 6.98E-02 | 2640 | 0.12  | 9.08E-01 | 1474 | 2.36  | 1.82E-02 | 1998 | 3.29  | 1.02E-03 | 7691 |
| <i>PON1/2/3/4</i>     | rs2299264  | A | G | 0.24 | 2.08  | 3.75E-02 | 1593 | 0.64  | 5.20E-01 | 2688 | 1.84  | 6.65E-02 | 1362 | 2.27  | 2.34E-02 | 2019 | 3.27  | 1.09E-03 | 7662 |
| <i>ABCA1</i>          | rs4100654  | G | A | 0.10 | -3.04 | 2.40E-03 | 1599 | -0.93 | 3.52E-01 | 2692 | -2.04 | 4.13E-02 | 1543 | -0.83 | 4.08E-01 | 2020 | -3.24 | 1.20E-03 | 7854 |

|            |            |   |   |      |       |          |      |       |          |      |       |          |      |       |          |      |       |          |      |
|------------|------------|---|---|------|-------|----------|------|-------|----------|------|-------|----------|------|-------|----------|------|-------|----------|------|
| LPL        | rs253      | A | G | 0.46 | 2.45  | 1.42E-02 | 1600 | 1.58  | 1.15E-01 | 2692 | 1.42  | 1.56E-01 | 1537 | 1.08  | 2.78E-01 | 2020 | 3.21  | 1.33E-03 | 7849 |
| LIPC       | rs4774297  | C | A | 0.49 | 2.57  | 1.03E-02 | 1600 | 1.47  | 1.43E-01 | 2693 | 0.57  | 5.66E-01 | 1539 | 1.78  | 7.51E-02 | 2020 | 3.17  | 1.51E-03 | 7852 |
| LIPC       | rs572410   | C | G | 0.27 | 2.92  | 3.54E-03 | 1600 | 1.12  | 2.62E-01 | 2693 | 1.43  | 1.52E-01 | 1542 | 1.06  | 2.88E-01 | 2020 | 3.15  | 1.65E-03 | 7855 |
| LIPC       | rs4775070  | A | G | 0.08 | 2.47  | 1.34E-02 | 1600 | 1.59  | 1.13E-01 | 2693 | 0.45  | 6.52E-01 | 1544 | 1.75  | 8.04E-02 | 2020 | 3.13  | 1.74E-03 | 7857 |
| PON1/2/3/4 | rs13228784 | G | A | 0.25 | 2.59  | 9.71E-03 | 1600 | 0.67  | 5.06E-01 | 2693 | 0.70  | 4.84E-01 | 1543 | 2.48  | 1.30E-02 | 2020 | 3.13  | 1.77E-03 | 7856 |
| APOB       | rs1801699  | G | A | 0.02 | -1.69 | 9.12E-02 | 1600 | -0.53 | 5.96E-01 | 2691 | -2.53 | 1.14E-02 | 1542 | -1.83 | 6.75E-02 | 2020 | -3.12 | 1.80E-03 | 7853 |
| PON1/2/3/4 | rs740264   | C | A | 0.25 | 2.59  | 9.59E-03 | 1600 | 0.60  | 5.48E-01 | 2693 | 0.77  | 4.42E-01 | 1543 | 2.45  | 1.42E-02 | 2019 | 3.11  | 1.90E-03 | 7855 |
| LPL        | rs1031045  | A | G | 0.05 | -2.44 | 1.47E-02 | 1600 | -0.59 | 5.56E-01 | 2693 | -1.25 | 2.11E-01 | 1544 | -2.18 | 2.94E-02 | 2020 | -3.10 | 1.91E-03 | 7857 |
| APOE/C1/C2 | rs405509   | A | C | 0.47 | -1.61 | 1.09E-01 | 1593 | -2.58 | 1.00E-02 | 2690 | -0.09 | 9.30E-01 | 1543 | -1.64 | 1.00E-01 | 2020 | -3.10 | 1.91E-03 | 7846 |
| PCSK5      | rs1340510  | G | A | 0.28 | 1.41  | 1.59E-01 | 1599 | 2.42  | 1.54E-02 | 2692 | 2.94  | 3.39E-03 | 1542 | -0.49 | 6.24E-01 | 2019 | 3.10  | 1.91E-03 | 7852 |
| PON1/2/3/4 | rs11764079 | A | G | 0.27 | 2.23  | 2.59E-02 | 1600 | 0.60  | 5.46E-01 | 2693 | 1.27  | 2.03E-01 | 1538 | 2.33  | 2.00E-02 | 2019 | 3.10  | 1.92E-03 | 7850 |
| ABCA1      | rs2575876  | A | G | 0.26 | -1.93 | 5.32E-02 | 1600 | -1.44 | 1.50E-01 | 2693 | -0.77 | 4.41E-01 | 1542 | -2.06 | 3.95E-02 | 2020 | -3.10 | 1.93E-03 | 7855 |
| APOE/C1/C2 | rs5167     | C | A | 0.37 | 1.16  | 2.45E-01 | 1600 | 0.34  | 7.34E-01 | 2692 | 2.94  | 3.30E-03 | 1543 | 2.12  | 3.42E-02 | 2020 | 3.10  | 1.94E-03 | 7855 |
| APOB       | rs673548   | A | G | 0.22 | 3.04  | 2.34E-03 | 1599 | 0.78  | 4.35E-01 | 2693 | 1.72  | 8.61E-02 | 1544 | 1.00  | 3.19E-01 | 2020 | 3.10  | 1.95E-03 | 7856 |
| APOB       | rs676210   | A | G | 0.21 | 3.07  | 2.17E-03 | 1600 | 0.76  | 4.47E-01 | 2693 | 1.73  | 8.37E-02 | 1543 | 0.98  | 3.26E-01 | 2020 | 3.09  | 1.97E-03 | 7856 |
| GALNT2     | rs2144300  | G | A | 0.44 | -2.07 | 3.90E-02 | 1600 | -2.32 | 2.02E-02 | 2692 | -0.43 | 6.64E-01 | 1542 | -1.18 | 2.37E-01 | 2020 | -3.08 | 2.05E-03 | 7854 |
| NFKB1      | rs230528   | C | A | 0.39 | 2.57  | 1.02E-02 | 1573 | 1.38  | 1.66E-01 | 2664 | 0.26  | 7.94E-01 | 1417 | 1.91  | 5.62E-02 | 2018 | 3.07  | 2.14E-03 | 7672 |
| PON1/2/3/4 | rs17885069 | A | G | 0.26 | 1.88  | 6.07E-02 | 1600 | 0.48  | 6.31E-01 | 2693 | 1.83  | 6.76E-02 | 1542 | 2.21  | 2.70E-02 | 2020 | 3.06  | 2.22E-03 | 7855 |
| CETP       | rs820299   | G | A | 0.39 | -1.43 | 1.53E-01 | 1600 | 0.29  | 7.74E-01 | 2693 | -1.91 | 5.70E-02 | 1544 | -3.42 | 6.16E-04 | 2019 | -3.06 | 2.24E-03 | 7856 |
| PON1/2/3/4 | rs11981433 | G | A | 0.41 | -0.04 | 9.65E-01 | 1599 | -0.37 | 7.15E-01 | 2693 | -3.08 | 2.11E-03 | 1543 | -2.86 | 4.27E-03 | 2020 | -3.05 | 2.32E-03 | 7855 |
| PON1/2/3/4 | rs11981299 | T | A | 0.25 | 1.90  | 5.75E-02 | 1600 | 0.55  | 5.86E-01 | 2684 | 1.67  | 9.43E-02 | 1527 | 2.21  | 2.70E-02 | 2020 | 3.04  | 2.37E-03 | 7831 |
| NFKB1      | rs4648127  | A | G | 0.06 | -0.83 | 4.08E-01 | 1599 | -2.46 | 1.39E-02 | 2691 | -0.33 | 7.38E-01 | 1543 | -2.12 | 3.39E-02 | 2020 | -3.04 | 2.39E-03 | 7853 |
| GALNT2     | rs4846914  | G | A | 0.44 | -2.07 | 3.90E-02 | 1600 | -2.29 | 2.23E-02 | 2691 | -0.36 | 7.19E-01 | 1541 | -1.19 | 2.35E-01 | 2019 | -3.03 | 2.44E-03 | 7851 |
| ABCA1      | rs3858076  | C | A | 0.16 | -2.18 | 2.90E-02 | 1599 | -0.47 | 6.42E-01 | 2692 | -1.81 | 7.01E-02 | 1541 | -1.88 | 5.96E-02 | 2020 | -3.02 | 2.56E-03 | 7852 |
| LCAT       | rs2292318  | A | G | 0.14 | 0.00  | 9.96E-01 | 1600 | 1.22  | 2.24E-01 | 2693 | 2.48  | 1.33E-02 | 1509 | 2.37  | 1.76E-02 | 2020 | 3.01  | 2.62E-03 | 7822 |
| ABCA1      | rs2275544  | G | A | 0.14 | -2.26 | 2.40E-02 | 1599 | -0.49 | 6.26E-01 | 2693 | -1.81 | 7.02E-02 | 1542 | -1.76 | 7.87E-02 | 2019 | -3.00 | 2.71E-03 | 7853 |
| APOB       | rs2678379  | A | G | 0.22 | 2.89  | 3.84E-03 | 1600 | 0.70  | 4.86E-01 | 2693 | 1.70  | 8.99E-02 | 1544 | 1.03  | 3.04E-01 | 2020 | 2.99  | 2.83E-03 | 7857 |

|                       |            |   |   |      |       |          |      |       |          |      |       |          |      |       |          |      |       |          |      |
|-----------------------|------------|---|---|------|-------|----------|------|-------|----------|------|-------|----------|------|-------|----------|------|-------|----------|------|
| <i>ABCA1</i>          | rs1800977  | A | G | 0.35 | 2.24  | 2.49E-02 | 1600 | 2.27  | 2.34E-02 | 2693 | 0.72  | 4.74E-01 | 1543 | 0.64  | 5.24E-01 | 2020 | 2.98  | 2.88E-03 | 7856 |
| <i>PON1/2/3/4</i>     | rs7803148  | A | G | 0.40 | -0.02 | 9.88E-01 | 1600 | -0.12 | 9.08E-01 | 2693 | -3.11 | 1.91E-03 | 1541 | -3.02 | 2.56E-03 | 2020 | -2.98 | 2.89E-03 | 7854 |
| <i>ABCA1</i>          | rs2472507  | C | A | 0.22 | 2.23  | 2.58E-02 | 1600 | 1.57  | 1.16E-01 | 2693 | 0.71  | 4.77E-01 | 1544 | 1.38  | 1.69E-01 | 2020 | 2.94  | 3.28E-03 | 7857 |
| <i>LCAT</i>           | rs255052   | A | G | 0.15 | 0.14  | 8.85E-01 | 1599 | 1.17  | 2.41E-01 | 2692 | 1.85  | 6.42E-02 | 1538 | 2.67  | 7.57E-03 | 2019 | 2.93  | 3.44E-03 | 7848 |
| <i>PON1/2/3/4</i>     | rs13226149 | A | G | 0.27 | 2.22  | 2.64E-02 | 1600 | 0.41  | 6.78E-01 | 2693 | 1.26  | 2.08E-01 | 1538 | 2.20  | 2.76E-02 | 2020 | 2.92  | 3.50E-03 | 7851 |
| <i>NFKB1</i>          | rs4648058  | C | G | 0.31 | 2.10  | 3.56E-02 | 1600 | 1.49  | 1.36E-01 | 2690 | 0.30  | 7.61E-01 | 1543 | 1.90  | 5.76E-02 | 2020 | 2.92  | 3.50E-03 | 7853 |
| <i>ABCA1</i>          | rs2740485  | C | A | 0.12 | -1.93 | 5.39E-02 | 1600 | -2.66 | 7.96E-03 | 2690 | -0.83 | 4.07E-01 | 1532 | -0.25 | 8.01E-01 | 2020 | -2.92 | 3.51E-03 | 7842 |
| <i>ABCA1</i>          | rs2275545  | G | A | 0.16 | -2.27 | 2.30E-02 | 1600 | -0.26 | 7.95E-01 | 2693 | -1.75 | 7.97E-02 | 1542 | -1.90 | 5.74E-02 | 2020 | -2.92 | 3.52E-03 | 7855 |
| <i>APOB</i>           | rs1042034  | G | A | 0.21 | 2.72  | 6.56E-03 | 1600 | 0.74  | 4.61E-01 | 2692 | 1.73  | 8.43E-02 | 1542 | 0.95  | 3.40E-01 | 2020 | 2.91  | 3.65E-03 | 7854 |
| <i>ABCA1</i>          | rs2472496  | G | A | 0.39 | -0.96 | 3.39E-01 | 1600 | -1.56 | 1.18E-01 | 2693 | -1.59 | 1.13E-01 | 1540 | -1.68 | 9.39E-02 | 2019 | -2.90 | 3.75E-03 | 7852 |
| <i>PCSK5</i>          | rs7031971  | G | A | 0.47 | -3.50 | 4.64E-04 | 1600 | -2.21 | 2.71E-02 | 2693 | 0.03  | 9.76E-01 | 1544 | -0.07 | 9.47E-01 | 2019 | -2.90 | 3.80E-03 | 7856 |
| <i>NFKB1</i>          | rs997476   | A | C | 0.06 | -0.84 | 3.99E-01 | 1598 | -2.71 | 6.86E-03 | 2693 | 0.03  | 9.76E-01 | 1542 | -1.84 | 6.56E-02 | 2019 | -2.88 | 3.92E-03 | 7852 |
| <i>ABCA1</i>          | rs2000069  | A | G | 0.49 | -0.47 | 6.36E-01 | 1600 | -2.03 | 4.29E-02 | 2693 | -1.36 | 1.74E-01 | 1543 | -1.73 | 8.41E-02 | 2019 | -2.88 | 4.00E-03 | 7855 |
| <i>NFKB1</i>          | rs230541   | G | A | 0.40 | 2.17  | 3.04E-02 | 1600 | 1.52  | 1.29E-01 | 2693 | -0.01 | 9.91E-01 | 1541 | 1.96  | 4.98E-02 | 2019 | 2.86  | 4.29E-03 | 7853 |
| <i>LIPC</i>           | rs8041059  | A | G | 0.49 | -1.43 | 1.52E-01 | 1599 | -1.75 | 8.03E-02 | 2692 | -0.72 | 4.72E-01 | 1540 | -1.70 | 8.84E-02 | 2017 | -2.85 | 4.33E-03 | 7848 |
| <i>ABCA1</i>          | rs2422493  | A | G | 0.48 | 1.31  | 1.92E-01 | 1597 | 2.24  | 2.49E-02 | 2692 | 0.37  | 7.14E-01 | 1524 | 1.55  | 1.22E-01 | 2020 | 2.85  | 4.34E-03 | 7833 |
| <i>APOA1/A4/A5/C3</i> | rs1729409  | G | A | 0.48 | -2.01 | 4.42E-02 | 1600 | -1.84 | 6.64E-02 | 2693 | -0.96 | 3.37E-01 | 1540 | -0.87 | 3.85E-01 | 2020 | -2.85 | 4.38E-03 | 7853 |
| <i>NFKB1</i>          | rs3817685  | C | G | 0.31 | 2.05  | 4.03E-02 | 1600 | 1.53  | 1.26E-01 | 2693 | 0.26  | 7.96E-01 | 1541 | 1.79  | 7.29E-02 | 2019 | 2.85  | 4.44E-03 | 7853 |
| <i>PPARD</i>          | rs2016520  | G | A | 0.23 | 1.83  | 6.70E-02 | 1600 | 2.05  | 4.06E-02 | 2693 | 0.73  | 4.67E-01 | 1544 | 0.97  | 3.31E-01 | 2020 | 2.84  | 4.51E-03 | 7857 |
| <i>PLTP</i>           | rs378114   | A | G | 0.29 | 1.91  | 5.60E-02 | 1598 | 1.17  | 2.43E-01 | 2693 | 0.65  | 5.18E-01 | 1543 | 1.97  | 4.83E-02 | 2020 | 2.83  | 4.60E-03 | 7854 |
| <i>NFKB1</i>          | rs1287     | A | G | 0.40 | 2.13  | 3.33E-02 | 1600 | 1.47  | 1.41E-01 | 2692 | -0.02 | 9.83E-01 | 1536 | 2.01  | 4.48E-02 | 2019 | 2.83  | 4.62E-03 | 7847 |
| <i>NFKB1</i>          | rs12509403 | A | G | 0.31 | 2.11  | 3.51E-02 | 1600 | 1.42  | 1.55E-01 | 2693 | 0.22  | 8.23E-01 | 1542 | 1.87  | 6.11E-02 | 2019 | 2.83  | 4.62E-03 | 7854 |
| <i>APOA1/A4/A5/C3</i> | rs10750097 | G | A | 0.24 | -1.44 | 1.50E-01 | 1599 | -1.05 | 2.96E-01 | 2693 | -0.30 | 7.66E-01 | 1542 | -2.83 | 4.60E-03 | 2020 | -2.83 | 4.65E-03 | 7854 |
| <i>SOAT1</i>          | rs4421551  | C | A | 0.14 | 2.55  | 1.08E-02 | 1600 | 2.12  | 3.40E-02 | 2690 | 0.90  | 3.68E-01 | 1530 | 0.06  | 9.56E-01 | 2020 | 2.82  | 4.81E-03 | 7840 |
| <i>SCARB1</i>         | rs865716   | A | T | 0.50 | 3.90  | 9.62E-05 | 1600 | 0.90  | 3.67E-01 | 2688 | 0.79  | 4.32E-01 | 1531 | 0.36  | 7.20E-01 | 2020 | 2.82  | 4.81E-03 | 7839 |
| <i>ABCA1</i>          | rs2043664  | A | G | 0.27 | -0.74 | 4.59E-01 | 1600 | -1.77 | 7.73E-02 | 2693 | -1.06 | 2.88E-01 | 1544 | -1.92 | 5.43E-02 | 2020 | -2.82 | 4.88E-03 | 7857 |
| <i>LPL</i>            | rs10099160 | C | A | 0.21 | -2.50 | 1.23E-02 | 1600 | -1.12 | 2.65E-01 | 2693 | -0.30 | 7.67E-01 | 1542 | -1.75 | 7.93E-02 | 2020 | -2.80 | 5.04E-03 | 7855 |

|                   |            |   |   |      |       |          |      |       |          |      |       |          |      |       |          |      |       |          |      |
|-------------------|------------|---|---|------|-------|----------|------|-------|----------|------|-------|----------|------|-------|----------|------|-------|----------|------|
| <i>LPL</i>        | rs2197089  | G | A | 0.43 | -1.74 | 8.26E-02 | 1592 | -1.30 | 1.96E-01 | 2681 | -1.57 | 1.17E-01 | 1534 | -1.12 | 2.62E-01 | 2019 | -2.80 | 5.05E-03 | 7826 |
| <i>LPL</i>        | rs3200218  | G | A | 0.21 | -2.49 | 1.27E-02 | 1600 | -1.20 | 2.32E-01 | 2693 | -0.26 | 7.98E-01 | 1540 | -1.68 | 9.25E-02 | 2020 | -2.79 | 5.24E-03 | 7853 |
| <i>LIPC</i>       | rs17190517 | A | G | 0.42 | -1.28 | 2.01E-01 | 1599 | -0.83 | 4.09E-01 | 2688 | -1.75 | 8.08E-02 | 1540 | -1.87 | 6.10E-02 | 2019 | -2.79 | 5.36E-03 | 7846 |
| <i>PCSK5</i>      | rs12683707 | A | G | 0.03 | -1.88 | 5.96E-02 | 1600 | -2.53 | 1.15E-02 | 2693 | -0.61 | 5.42E-01 | 1544 | -0.31 | 7.54E-01 | 2020 | -2.76 | 5.81E-03 | 7857 |
| <i>LRP2</i>       | rs34291900 | A | G | 0.03 | -0.66 | 5.11E-01 | 1600 | -3.16 | 1.59E-03 | 2693 | -1.49 | 1.38E-01 | 1544 | 0.10  | 9.17E-01 | 2020 | -2.75 | 5.95E-03 | 7857 |
| <i>LIPC</i>       | rs4775072  | A | G | 0.06 | 0.67  | 5.06E-01 | 1600 | 2.69  | 7.29E-03 | 2693 | -0.09 | 9.30E-01 | 1544 | 1.78  | 7.54E-02 | 2020 | 2.73  | 6.26E-03 | 7857 |
| <i>LIPC</i>       | rs6494005  | G | A | 0.49 | -1.61 | 1.07E-01 | 1600 | -0.80 | 4.25E-01 | 2693 | -1.17 | 2.43E-01 | 1539 | -2.00 | 4.54E-02 | 2020 | -2.73 | 6.40E-03 | 7852 |
| <i>SCARB1</i>     | rs4379922  | G | A | 0.35 | 2.41  | 1.59E-02 | 1600 | 1.62  | 1.06E-01 | 2693 | 1.20  | 2.31E-01 | 1543 | 0.31  | 7.54E-01 | 2019 | 2.73  | 6.43E-03 | 7855 |
| <i>ABCA1</i>      | rs2230808  | A | G | 0.30 | -0.98 | 3.29E-01 | 1600 | -3.17 | 1.54E-03 | 2693 | -0.81 | 4.18E-01 | 1543 | -0.07 | 9.45E-01 | 2020 | -2.69 | 7.17E-03 | 7856 |
| <i>CETP</i>       | rs158477   | G | A | 0.48 | 0.90  | 3.68E-01 | 1600 | 0.64  | 5.21E-01 | 2693 | 0.86  | 3.92E-01 | 1543 | 3.01  | 2.62E-03 | 2020 | 2.69  | 7.20E-03 | 7856 |
| <i>PCSK6</i>      | rs7165901  | C | G | 0.29 | 1.19  | 2.34E-01 | 1600 | 1.67  | 9.58E-02 | 2693 | 1.49  | 1.37E-01 | 1543 | 0.96  | 3.36E-01 | 2019 | 2.66  | 7.82E-03 | 7855 |
| <i>LIPC</i>       | rs12914035 | G | A | 0.14 | -1.91 | 5.67E-02 | 1598 | -0.66 | 5.07E-01 | 2686 | -2.74 | 6.13E-03 | 1536 | -0.39 | 6.99E-01 | 2019 | -2.66 | 7.85E-03 | 7839 |
| <i>SCARB1</i>     | rs10773112 | G | A | 0.30 | -1.08 | 2.81E-01 | 1600 | -1.24 | 2.17E-01 | 2693 | -1.70 | 8.90E-02 | 1543 | -1.36 | 1.73E-01 | 2019 | -2.66 | 7.94E-03 | 7855 |
| <i>PPARD</i>      | rs2267667  | G | C | 0.30 | 2.35  | 1.90E-02 | 1600 | 1.80  | 7.14E-02 | 2693 | 0.73  | 4.68E-01 | 1544 | 0.43  | 6.68E-01 | 2020 | 2.65  | 7.97E-03 | 7857 |
| <i>ABCA1</i>      | rs3780543  | G | A | 0.15 | 2.59  | 9.73E-03 | 1600 | 1.49  | 1.36E-01 | 2683 | 1.32  | 1.87E-01 | 1526 | 0.02  | 9.84E-01 | 2019 | 2.64  | 8.42E-03 | 7828 |
| <i>PPARD</i>      | rs9658081  | A | G | 0.03 | 1.56  | 1.19E-01 | 1600 | 1.42  | 1.55E-01 | 2686 | 0.71  | 4.81E-01 | 1544 | 1.53  | 1.25E-01 | 2019 | 2.63  | 8.62E-03 | 7849 |
| <i>NFKB1</i>      | rs4648011  | C | A | 0.39 | 2.22  | 2.62E-02 | 1600 | 0.93  | 3.52E-01 | 2693 | -0.03 | 9.73E-01 | 1538 | 2.15  | 3.19E-02 | 2018 | 2.62  | 8.76E-03 | 7849 |
| <i>PON1/2/3/4</i> | rs3757707  | A | G | 0.29 | 2.16  | 3.09E-02 | 1600 | 0.67  | 5.05E-01 | 2693 | 1.26  | 2.09E-01 | 1543 | 1.37  | 1.71E-01 | 2019 | 2.62  | 8.91E-03 | 7855 |
| <i>PPARD</i>      | rs1053049  | G | A | 0.29 | 2.47  | 1.36E-02 | 1600 | 2.05  | 4.05E-02 | 2691 | 0.09  | 9.29E-01 | 1536 | 0.46  | 6.44E-01 | 2020 | 2.59  | 9.65E-03 | 7847 |
| <i>ABCA1</i>      | rs3847305  | C | G | 0.19 | -1.80 | 7.19E-02 | 1600 | -0.03 | 9.75E-01 | 2693 | -1.65 | 9.98E-02 | 1543 | -2.02 | 4.38E-02 | 2020 | -2.58 | 9.80E-03 | 7856 |
| <i>PPARD</i>      | rs760783   | A | C | 0.16 | 0.88  | 3.78E-01 | 1600 | 2.65  | 8.18E-03 | 2693 | 0.48  | 6.35E-01 | 1544 | 0.84  | 4.02E-01 | 2020 | 2.58  | 9.83E-03 | 7857 |
| <i>ABCA1</i>      | rs12341993 | A | C | 0.13 | -3.22 | 1.26E-03 | 1600 | -0.08 | 9.37E-01 | 2693 | -0.94 | 3.48E-01 | 1543 | -1.31 | 1.91E-01 | 2020 | -2.58 | 9.86E-03 | 7856 |
| <i>NFKB1</i>      | rs1598857  | A | G | 0.38 | 2.37  | 1.77E-02 | 1599 | 1.08  | 2.80E-01 | 2686 | -0.28 | 7.83E-01 | 1538 | 1.96  | 4.94E-02 | 2018 | 2.58  | 9.92E-03 | 7841 |
| <i>NFKB1</i>      | rs1609798  | A | G | 0.29 | 1.67  | 9.56E-02 | 1600 | 0.91  | 3.61E-01 | 2693 | 0.88  | 3.79E-01 | 1539 | 1.77  | 7.59E-02 | 2020 | 2.58  | 9.96E-03 | 7852 |
| <i>LIPC</i>       | rs12900622 | G | A | 0.14 | -1.86 | 6.34E-02 | 1600 | -0.54 | 5.90E-01 | 2692 | -2.65 | 8.20E-03 | 1541 | -0.48 | 6.34E-01 | 2019 | -2.57 | 1.03E-02 | 7852 |
| <i>ABCA1</i>      | rs12235875 | G | A | 0.08 | 2.48  | 1.30E-02 | 1600 | 0.56  | 5.72E-01 | 2682 | 0.90  | 3.67E-01 | 1537 | 1.40  | 1.61E-01 | 2019 | 2.56  | 1.04E-02 | 7838 |
| <i>PCSK5</i>      | rs12343074 | A | G | 0.02 | 1.54  | 1.23E-01 | 1600 | 3.18  | 1.49E-03 | 2693 | 0.16  | 8.76E-01 | 1544 | -0.12 | 9.02E-01 | 2020 | 2.56  | 1.04E-02 | 7857 |

|                       |            |   |   |      |       |          |      |       |          |      |       |          |      |       |          |      |       |          |      |
|-----------------------|------------|---|---|------|-------|----------|------|-------|----------|------|-------|----------|------|-------|----------|------|-------|----------|------|
| <i>NFKB1</i>          | rs3774933  | G | A | 0.38 | 2.28  | 2.24E-02 | 1600 | 1.02  | 3.06E-01 | 2692 | -0.21 | 8.32E-01 | 1540 | 2.02  | 4.29E-02 | 2019 | 2.56  | 1.04E-02 | 7851 |
| <i>NR5A2</i>          | rs7551367  | G | A | 0.17 | -1.55 | 1.22E-01 | 1598 | -0.81 | 4.19E-01 | 2693 | -2.77 | 5.66E-03 | 1541 | -0.32 | 7.52E-01 | 2019 | -2.56 | 1.06E-02 | 7851 |
| <i>PPARD</i>          | rs2267669  | G | A | 0.18 | 1.31  | 1.90E-01 | 1599 | 2.15  | 3.15E-02 | 2693 | 0.87  | 3.83E-01 | 1544 | 0.63  | 5.32E-01 | 2020 | 2.56  | 1.06E-02 | 7856 |
| <i>PLTP</i>           | rs11569671 | A | G | 0.03 | -1.82 | 6.91E-02 | 1597 | -2.11 | 3.52E-02 | 2677 | -0.04 | 9.66E-01 | 1527 | -0.95 | 3.45E-01 | 2020 | -2.55 | 1.07E-02 | 7821 |
| <i>ABCA1</i>          | rs4149313  | G | A | 0.17 | 2.26  | 2.38E-02 | 1600 | 1.56  | 1.20E-01 | 2693 | 1.42  | 1.56E-01 | 1543 | -0.01 | 9.88E-01 | 2020 | 2.55  | 1.07E-02 | 7856 |
| <i>PPARD</i>          | rs2076167  | G | A | 0.29 | 2.38  | 1.74E-02 | 1600 | 2.08  | 3.78E-02 | 2693 | 0.15  | 8.82E-01 | 1543 | 0.39  | 7.00E-01 | 2020 | 2.55  | 1.08E-02 | 7856 |
| <i>PPARD</i>          | rs2076166  | A | G | 0.16 | 1.01  | 3.11E-01 | 1597 | 2.63  | 8.49E-03 | 2690 | 0.35  | 7.27E-01 | 1538 | 0.77  | 4.40E-01 | 2019 | 2.55  | 1.09E-02 | 7844 |
| <i>PCSK5</i>          | rs17668141 | A | G | 0.36 | -2.58 | 9.94E-03 | 1600 | -2.39 | 1.70E-02 | 2692 | -1.56 | 1.18E-01 | 1544 | 1.41  | 1.59E-01 | 2019 | -2.54 | 1.11E-02 | 7855 |
| <i>LIPG</i>           | rs9958734  | G | A | 0.05 | 1.38  | 1.67E-01 | 1600 | 1.29  | 1.96E-01 | 2693 | 1.27  | 2.06E-01 | 1544 | 1.18  | 2.40E-01 | 2020 | 2.54  | 1.12E-02 | 7857 |
| <i>NFKB1</i>          | rs4648051  | G | A | 0.28 | 1.95  | 5.10E-02 | 1599 | 1.09  | 2.78E-01 | 2690 | 0.03  | 9.73E-01 | 1539 | 1.98  | 4.75E-02 | 2018 | 2.54  | 1.12E-02 | 7846 |
| <i>PPARD</i>          | rs2267665  | A | G | 0.17 | 1.18  | 2.39E-01 | 1600 | 2.12  | 3.44E-02 | 2693 | 0.91  | 3.64E-01 | 1544 | 0.71  | 4.75E-01 | 2020 | 2.54  | 1.13E-02 | 7857 |
| <i>ABCA1</i>          | rs4149338  | A | G | 0.29 | 1.46  | 1.44E-01 | 1600 | 2.10  | 3.56E-02 | 2693 | -0.36 | 7.16E-01 | 1544 | 1.58  | 1.13E-01 | 2020 | 2.53  | 1.14E-02 | 7857 |
| <i>ABCA1</i>          | rs2487042  | A | G | 0.22 | 1.25  | 2.11E-01 | 1595 | 1.85  | 6.47E-02 | 2692 | 0.24  | 8.11E-01 | 1515 | 1.52  | 1.29E-01 | 2019 | 2.53  | 1.16E-02 | 7821 |
| <i>NFKB1</i>          | rs1599961  | A | G | 0.38 | 2.32  | 2.05E-02 | 1600 | 1.03  | 3.01E-01 | 2693 | -0.29 | 7.72E-01 | 1539 | 1.97  | 4.88E-02 | 2020 | 2.52  | 1.17E-02 | 7852 |
| <i>LRP1</i>           | rs1466535  | A | G | 0.32 | -0.82 | 4.10E-01 | 1600 | -2.13 | 3.35E-02 | 2693 | -0.73 | 4.63E-01 | 1544 | -1.14 | 2.54E-01 | 2020 | -2.52 | 1.17E-02 | 7857 |
| <i>RXRA</i>           | rs3132300  | A | G | 0.21 | -1.02 | 3.08E-01 | 1599 | -2.10 | 3.61E-02 | 2693 | -1.05 | 2.94E-01 | 1543 | -0.72 | 4.70E-01 | 2020 | -2.52 | 1.18E-02 | 7855 |
| <i>ABCA1</i>          | rs2740483  | C | G | 0.28 | -1.09 | 2.77E-01 | 1600 | -1.59 | 1.12E-01 | 2688 | -0.92 | 3.59E-01 | 1542 | -1.35 | 1.77E-01 | 2020 | -2.51 | 1.20E-02 | 7850 |
| <i>ABCA1</i>          | rs1883023  | A | G | 0.30 | -1.21 | 2.25E-01 | 1600 | -2.85 | 4.40E-03 | 2693 | -0.35 | 7.29E-01 | 1543 | -0.28 | 7.78E-01 | 2020 | -2.51 | 1.20E-02 | 7856 |
| <i>PAFAH1B1</i>       | rs8082331  | G | A | 0.04 | 0.45  | 6.55E-01 | 1600 | 2.14  | 3.23E-02 | 2692 | 1.60  | 1.11E-01 | 1542 | 0.68  | 4.93E-01 | 2020 | 2.51  | 1.21E-02 | 7854 |
| <i>PON1/2/3/4</i>     | rs854568   | G | A | 0.25 | 2.97  | 2.97E-03 | 1600 | 1.09  | 2.74E-01 | 2693 | 0.33  | 7.44E-01 | 1543 | 0.74  | 4.58E-01 | 2020 | 2.50  | 1.23E-02 | 7856 |
| <i>LIPG</i>           | rs12966382 | A | G | 0.15 | 2.59  | 9.51E-03 | 1600 | 0.11  | 9.09E-01 | 2693 | 0.06  | 9.49E-01 | 1542 | 2.41  | 1.59E-02 | 2018 | 2.49  | 1.29E-02 | 7853 |
| <i>HDLBP</i>          | rs1064767  | G | A | 0.17 | -0.35 | 7.26E-01 | 1600 | -1.78 | 7.51E-02 | 2693 | -1.27 | 2.05E-01 | 1535 | -1.42 | 1.55E-01 | 2019 | -2.48 | 1.30E-02 | 7847 |
| <i>LRP1</i>           | rs4759044  | G | A | 0.44 | 0.14  | 8.88E-01 | 1600 | -2.58 | 9.89E-03 | 2687 | -1.49 | 1.36E-01 | 1541 | -0.72 | 4.70E-01 | 2020 | -2.47 | 1.34E-02 | 7848 |
| <i>PCSK5</i>          | rs11144706 | A | T | 0.08 | -1.71 | 8.76E-02 | 1600 | -1.35 | 1.77E-01 | 2693 | -1.19 | 2.34E-01 | 1543 | -0.74 | 4.60E-01 | 2020 | -2.46 | 1.38E-02 | 7856 |
| <i>APOA1/A4/A5/C3</i> | rs34003087 | A | G | 0.05 | 0.82  | 4.14E-01 | 1599 | 0.08  | 9.39E-01 | 2692 | 1.32  | 1.87E-01 | 1544 | 2.87  | 4.13E-03 | 2020 | 2.45  | 1.42E-02 | 7855 |
| <i>LIPC</i>           | rs17301822 | A | G | 0.03 | 1.65  | 9.83E-02 | 1600 | 0.88  | 3.80E-01 | 2693 | 0.12  | 9.02E-01 | 1544 | 2.24  | 2.52E-02 | 2020 | 2.45  | 1.43E-02 | 7857 |
| <i>LPL</i>            | rs4922115  | A | G | 0.15 | 1.26  | 2.09E-01 | 1596 | 1.12  | 2.63E-01 | 2651 | 1.64  | 1.02E-01 | 1335 | 1.00  | 3.15E-01 | 1997 | 2.44  | 1.47E-02 | 7579 |



|                   |            |   |   |      |       |          |      |       |          |      |       |          |      |       |          |      |       |          |      |
|-------------------|------------|---|---|------|-------|----------|------|-------|----------|------|-------|----------|------|-------|----------|------|-------|----------|------|
| <i>NFKB1</i>      | rs747559   | G | A | 0.39 | 1.96  | 5.03E-02 | 1600 | 1.19  | 2.36E-01 | 2693 | -0.30 | 7.64E-01 | 1539 | 1.95  | 5.08E-02 | 2019 | 2.44  | 1.48E-02 | 7851 |
| <i>SCARB1</i>     | rs10773105 | G | A | 0.47 | 3.92  | 9.03E-05 | 1599 | 0.67  | 5.02E-01 | 2693 | -0.45 | 6.52E-01 | 1534 | 0.93  | 3.54E-01 | 2020 | 2.43  | 1.50E-02 | 7846 |
| <i>MMAB/MVK</i>   | rs11067394 | G | A | 0.22 | 1.74  | 8.21E-02 | 1600 | 1.31  | 1.89E-01 | 2693 | 0.70  | 4.87E-01 | 1542 | 1.12  | 2.63E-01 | 2020 | 2.43  | 1.51E-02 | 7855 |
| <i>ABCB11</i>     | rs853789   | A | G | 0.31 | -0.25 | 8.06E-01 | 1599 | 1.77  | 7.61E-02 | 2693 | 0.44  | 6.59E-01 | 1538 | 2.57  | 1.01E-02 | 2020 | 2.43  | 1.52E-02 | 7850 |
| <i>ABCA1</i>      | rs4149269  | G | A | 0.39 | -1.64 | 1.01E-01 | 1600 | -1.37 | 1.72E-01 | 2662 | -0.37 | 7.09E-01 | 1544 | -1.42 | 1.56E-01 | 2020 | -2.42 | 1.54E-02 | 7826 |
| <i>NFKB1</i>      | rs980455   | G | A | 0.39 | 1.93  | 5.41E-02 | 1600 | 1.25  | 2.13E-01 | 2693 | -0.33 | 7.41E-01 | 1538 | 1.91  | 5.62E-02 | 2019 | 2.42  | 1.55E-02 | 7850 |
| <i>TAP2</i>       | rs9357155  | A | G | 0.10 | 0.81  | 4.16E-01 | 1599 | 1.09  | 2.78E-01 | 2693 | 1.25  | 2.13E-01 | 1541 | 1.71  | 8.77E-02 | 2020 | 2.42  | 1.55E-02 | 7853 |
| <i>PCSK6</i>      | rs1871975  | G | A | 0.43 | 1.08  | 2.79E-01 | 1600 | 0.36  | 7.15E-01 | 2692 | 2.57  | 1.03E-02 | 1544 | 1.14  | 2.53E-01 | 2020 | 2.42  | 1.56E-02 | 7856 |
| <i>PCSK5</i>      | rs1856508  | A | C | 0.09 | 2.29  | 2.23E-02 | 1598 | 1.01  | 3.12E-01 | 2690 | 1.33  | 1.83E-01 | 1537 | 0.40  | 6.86E-01 | 2020 | 2.42  | 1.56E-02 | 7845 |
| <i>APOE/C1/C2</i> | rs12709889 | A | G | 0.27 | 0.84  | 4.02E-01 | 1590 | 0.40  | 6.92E-01 | 2660 | 2.60  | 9.39E-03 | 1498 | 1.30  | 1.95E-01 | 2007 | 2.41  | 1.58E-02 | 7755 |
| <i>CETP</i>       | rs12720917 | G | A | 0.14 | 1.96  | 5.05E-02 | 1600 | 0.93  | 3.50E-01 | 2693 | 0.24  | 8.12E-01 | 1543 | 1.73  | 8.36E-02 | 2020 | 2.41  | 1.59E-02 | 7856 |
| <i>LIPC</i>       | rs11852861 | A | G | 0.40 | 0.21  | 8.32E-01 | 1600 | 0.94  | 3.50E-01 | 2693 | 1.25  | 2.11E-01 | 1543 | 2.39  | 1.70E-02 | 2020 | 2.41  | 1.61E-02 | 7856 |
| <i>CETP</i>       | rs1800776  | A | C | 0.07 | -1.63 | 1.03E-01 | 1600 | 0.29  | 7.70E-01 | 2693 | -2.10 | 3.57E-02 | 1544 | -1.79 | 7.37E-02 | 2020 | -2.40 | 1.63E-02 | 7857 |
| <i>ABCB11</i>     | rs569805   | T | A | 0.32 | -0.76 | 4.46E-01 | 1600 | 2.20  | 2.77E-02 | 2693 | 0.50  | 6.15E-01 | 1543 | 2.43  | 1.50E-02 | 2020 | 2.40  | 1.63E-02 | 7856 |
| <i>LIPG</i>       | rs3744843  | G | A | 0.06 | 1.26  | 2.07E-01 | 1598 | 1.09  | 2.76E-01 | 2691 | 1.55  | 1.20E-01 | 1541 | 0.99  | 3.24E-01 | 2020 | 2.40  | 1.66E-02 | 7850 |
| <i>APOB</i>       | rs693      | A | G | 0.46 | -1.86 | 6.32E-02 | 1600 | -0.58 | 5.62E-01 | 2693 | -2.14 | 3.30E-02 | 1542 | -0.53 | 5.99E-01 | 2019 | -2.39 | 1.68E-02 | 7854 |
| <i>ABCB11</i>     | rs484066   | T | A | 0.37 | -0.38 | 7.06E-01 | 1600 | 1.90  | 5.78E-02 | 2692 | 0.52  | 6.01E-01 | 1543 | 2.38  | 1.71E-02 | 2019 | 2.38  | 1.73E-02 | 7854 |
| <i>ABCB11</i>     | rs3770603  | A | G | 0.09 | -1.33 | 1.84E-01 | 1600 | -1.79 | 7.33E-02 | 2693 | -0.21 | 8.37E-01 | 1543 | -1.26 | 2.07E-01 | 2020 | -2.38 | 1.74E-02 | 7856 |
| <i>NR5A2</i>      | rs2821369  | A | G | 0.09 | 0.17  | 8.64E-01 | 1600 | -2.45 | 1.42E-02 | 2692 | -1.56 | 1.18E-01 | 1543 | -0.64 | 5.22E-01 | 2020 | -2.38 | 1.75E-02 | 7855 |
| <i>SCARB1</i>     | rs4765180  | A | G | 0.48 | 2.53  | 1.13E-02 | 1596 | 1.27  | 2.05E-01 | 2691 | 0.80  | 4.25E-01 | 1541 | 0.26  | 7.93E-01 | 2015 | 2.37  | 1.77E-02 | 7843 |
| <i>ABCG1</i>      | rs7277991  | A | C | 0.35 | -0.69 | 4.89E-01 | 1600 | -1.23 | 2.20E-01 | 2693 | -0.51 | 6.09E-01 | 1543 | -2.20 | 2.81E-02 | 2020 | -2.37 | 1.77E-02 | 7856 |
| <i>ATP5B</i>      | rs1465081  | A | G | 0.26 | 0.25  | 8.01E-01 | 1600 | -2.32 | 2.03E-02 | 2690 | -2.36 | 1.85E-02 | 1541 | -0.15 | 8.78E-01 | 2020 | -2.37 | 1.80E-02 | 7851 |
| <i>LIPC</i>       | rs10518976 | A | T | 0.08 | 1.04  | 2.97E-01 | 1600 | 0.22  | 8.28E-01 | 2693 | 2.20  | 2.83E-02 | 1544 | 1.57  | 1.17E-01 | 2020 | 2.37  | 1.80E-02 | 7857 |
| <i>PCSK5</i>      | rs2789608  | G | C | 0.39 | 2.45  | 1.42E-02 | 1599 | 2.63  | 8.58E-03 | 2693 | 0.93  | 3.54E-01 | 1543 | -1.36 | 1.73E-01 | 2020 | 2.37  | 1.80E-02 | 7855 |
| <i>ABCA1</i>      | rs4149272  | A | G | 0.41 | -1.36 | 1.74E-01 | 1600 | -1.16 | 2.48E-01 | 2693 | -0.69 | 4.89E-01 | 1544 | -1.51 | 1.31E-01 | 2020 | -2.36 | 1.82E-02 | 7857 |
| <i>HDLBP</i>      | rs15129    | G | A | 0.18 | -0.51 | 6.10E-01 | 1598 | -1.72 | 8.50E-02 | 2690 | -1.27 | 2.06E-01 | 1544 | -1.11 | 2.68E-01 | 2020 | -2.36 | 1.82E-02 | 7852 |
| <i>PON1/2/3/4</i> | rs10487132 | G | A | 0.39 | -0.12 | 9.01E-01 | 1575 | 0.65  | 5.13E-01 | 2675 | -2.62 | 8.96E-03 | 1490 | -3.03 | 2.47E-03 | 2019 | -2.36 | 1.82E-02 | 7759 |

|                       |            |   |   |      |       |          |      |       |          |      |       |          |      |       |          |      |       |          |      |
|-----------------------|------------|---|---|------|-------|----------|------|-------|----------|------|-------|----------|------|-------|----------|------|-------|----------|------|
| <i>NFKB1</i>          | rs4648133  | G | A | 0.29 | 2.01  | 4.45E-02 | 1600 | 0.97  | 3.31E-01 | 2693 | 0.00  | 9.99E-01 | 1544 | 1.73  | 8.33E-02 | 2020 | 2.36  | 1.85E-02 | 7857 |
| <i>LPL</i>            | rs249      | G | A | 0.08 | 0.31  | 7.59E-01 | 1600 | 0.92  | 3.60E-01 | 2691 | 1.93  | 5.39E-02 | 1542 | 1.63  | 1.04E-01 | 2020 | 2.35  | 1.86E-02 | 7853 |
| <i>PCSK5</i>          | rs2777020  | G | A | 0.23 | 1.98  | 4.82E-02 | 1600 | 1.13  | 2.58E-01 | 2693 | 0.38  | 7.02E-01 | 1544 | 1.23  | 2.20E-01 | 2020 | 2.35  | 1.90E-02 | 7857 |
| <i>LIPC</i>           | rs12912415 | G | A | 0.13 | -1.47 | 1.42E-01 | 1600 | -0.48 | 6.31E-01 | 2693 | -2.39 | 1.68E-02 | 1542 | -0.67 | 5.02E-01 | 2020 | -2.34 | 1.91E-02 | 7855 |
| <i>PCSK5</i>          | rs11144672 | A | T | 0.04 | 1.77  | 7.64E-02 | 1600 | 1.68  | 9.33E-02 | 2692 | 0.44  | 6.59E-01 | 1544 | 0.72  | 4.74E-01 | 2019 | 2.34  | 1.92E-02 | 7855 |
| <i>ABCB11</i>         | rs853787   | C | A | 0.31 | -0.16 | 8.73E-01 | 1600 | 1.68  | 9.26E-02 | 2692 | 0.42  | 6.78E-01 | 1544 | 2.45  | 1.43E-02 | 2016 | 2.34  | 1.94E-02 | 7852 |
| <i>APOA1/A4/A5/C3</i> | rs619054   | A | G | 0.23 | 1.94  | 5.27E-02 | 1586 | 2.06  | 3.94E-02 | 2676 | -0.13 | 8.96E-01 | 1523 | 0.60  | 5.51E-01 | 2018 | 2.33  | 2.01E-02 | 7803 |
| <i>LIPC</i>           | rs4238330  | A | G | 0.06 | 1.32  | 1.88E-01 | 1600 | 1.51  | 1.31E-01 | 2693 | -0.33 | 7.41E-01 | 1544 | 1.95  | 5.11E-02 | 2020 | 2.32  | 2.03E-02 | 7857 |
| <i>PON1/2/3/4</i>     | rs6978425  | C | A | 0.34 | 2.08  | 3.79E-02 | 1599 | 0.84  | 4.00E-01 | 2688 | 1.50  | 1.34E-01 | 1542 | 0.45  | 6.54E-01 | 2019 | 2.32  | 2.03E-02 | 7848 |
| <i>SCARB1</i>         | rs7977729  | G | A | 0.26 | -0.68 | 4.96E-01 | 1600 | -0.38 | 7.01E-01 | 2693 | -4.01 | 6.34E-05 | 1543 | -0.03 | 9.79E-01 | 2019 | -2.32 | 2.04E-02 | 7855 |
| <i>PDZK1</i>          | rs12129861 | A | G | 0.45 | 0.48  | 6.33E-01 | 1590 | 1.41  | 1.59E-01 | 2684 | 0.95  | 3.40E-01 | 1531 | 1.65  | 9.92E-02 | 2014 | 2.30  | 2.14E-02 | 7819 |
| <i>MMAB/MVK</i>       | rs11067376 | G | A | 0.41 | 0.94  | 3.48E-01 | 1599 | 1.12  | 2.65E-01 | 2693 | 1.89  | 5.89E-02 | 1534 | 0.76  | 4.49E-01 | 2020 | 2.30  | 2.17E-02 | 7846 |
| <i>SORCS1</i>         | rs7897974  | A | G | 0.45 | 2.80  | 5.06E-03 | 1600 | 0.79  | 4.31E-01 | 2691 | 1.13  | 2.60E-01 | 1542 | 0.13  | 8.93E-01 | 2020 | 2.29  | 2.18E-02 | 7853 |
| <i>ABCA1</i>          | rs4149273  | G | A | 0.41 | -1.21 | 2.25E-01 | 1600 | -1.15 | 2.53E-01 | 2693 | -0.69 | 4.89E-01 | 1544 | -1.51 | 1.31E-01 | 2020 | -2.29 | 2.21E-02 | 7857 |
| <i>LIPG</i>           | rs11875600 | G | A | 0.09 | 1.36  | 1.73E-01 | 1600 | 1.64  | 1.01E-01 | 2692 | 0.62  | 5.38E-01 | 1528 | 0.87  | 3.86E-01 | 2019 | 2.29  | 2.21E-02 | 7839 |
| <i>TRIB1</i>          | rs17321515 | G | A | 0.47 | 0.74  | 4.62E-01 | 1600 | 1.56  | 1.18E-01 | 2693 | 2.43  | 1.52E-02 | 1544 | -0.07 | 9.46E-01 | 2020 | 2.29  | 2.21E-02 | 7857 |
| <i>ABCA1</i>          | rs3780542  | A | G | 0.08 | 2.16  | 3.08E-02 | 1600 | 0.32  | 7.47E-01 | 2693 | 1.03  | 3.05E-01 | 1536 | 1.32  | 1.88E-01 | 2018 | 2.29  | 2.22E-02 | 7847 |
| <i>SORCS1</i>         | rs11193154 | A | G | 0.06 | 0.42  | 6.74E-01 | 1600 | -2.20 | 2.80E-02 | 2693 | 0.76  | 4.46E-01 | 1544 | -3.00 | 2.70E-03 | 2020 | -2.28 | 2.26E-02 | 7857 |
| <i>PDZK1</i>          | rs1471633  | C | A | 0.49 | -0.12 | 9.02E-01 | 1582 | 1.45  | 1.47E-01 | 2677 | 2.04  | 4.19E-02 | 1517 | 1.13  | 2.60E-01 | 2016 | 2.27  | 2.35E-02 | 7792 |
| <i>ABCB11</i>         | rs853778   | A | G | 0.46 | -0.57 | 5.69E-01 | 1600 | 1.09  | 2.77E-01 | 2693 | -0.10 | 9.21E-01 | 1544 | 3.81  | 1.41E-04 | 2020 | 2.27  | 2.35E-02 | 7857 |
| <i>LPL</i>            | rs316      | A | C | 0.14 | 1.80  | 7.19E-02 | 1600 | 1.60  | 1.11E-01 | 2692 | -0.24 | 8.12E-01 | 1544 | 1.23  | 2.18E-01 | 2020 | 2.26  | 2.36E-02 | 7856 |
| <i>APOA1/A4/A5/C3</i> | rs675      | T | A | 0.19 | 0.91  | 3.65E-01 | 1600 | 0.81  | 4.18E-01 | 2693 | 1.46  | 1.44E-01 | 1541 | 1.44  | 1.49E-01 | 2020 | 2.26  | 2.36E-02 | 7854 |
| <i>PCSK5</i>          | rs6560478  | G | C | 0.36 | -0.77 | 4.44E-01 | 1600 | -1.61 | 1.08E-01 | 2692 | -0.72 | 4.72E-01 | 1277 | -1.27 | 2.02E-01 | 2019 | -2.26 | 2.37E-02 | 7588 |
| <i>NFKB1</i>          | rs11733293 | A | G | 0.31 | 1.76  | 7.85E-02 | 1598 | 1.05  | 2.96E-01 | 2690 | 0.57  | 5.66E-01 | 1529 | 1.17  | 2.41E-01 | 2017 | 2.26  | 2.41E-02 | 7834 |
| <i>NR5A2</i>          | rs3762399  | A | C | 0.10 | 0.56  | 5.78E-01 | 1600 | -2.65 | 8.01E-03 | 2692 | -1.78 | 7.54E-02 | 1544 | -0.32 | 7.49E-01 | 2018 | -2.25 | 2.43E-02 | 7854 |
| <i>ABCA1</i>          | rs2740476  | G | C | 0.24 | -0.78 | 4.33E-01 | 1600 | -1.92 | 5.54E-02 | 2693 | -0.94 | 3.46E-01 | 1544 | -0.71 | 4.81E-01 | 2020 | -2.25 | 2.44E-02 | 7857 |
| <i>APOA1/A4/A5/C3</i> | rs689243   | G | C | 0.42 | 2.51  | 1.22E-02 | 1600 | 2.25  | 2.43E-02 | 2693 | 0.03  | 9.79E-01 | 1541 | -0.42 | 6.78E-01 | 2020 | 2.25  | 2.44E-02 | 7854 |

|                       |            |   |   |      |       |          |      |       |          |      |       |          |      |       |          |      |       |          |      |
|-----------------------|------------|---|---|------|-------|----------|------|-------|----------|------|-------|----------|------|-------|----------|------|-------|----------|------|
| <i>LPL</i>            | rs4921683  | A | T | 0.16 | 1.25  | 2.13E-01 | 1599 | 1.34  | 1.80E-01 | 2682 | 0.74  | 4.60E-01 | 1539 | 1.12  | 2.61E-01 | 2019 | 2.25  | 2.48E-02 | 7839 |
| <i>APOA1/A4/A5/C3</i> | rs2266788  | G | A | 0.07 | -0.33 | 7.38E-01 | 1600 | -1.08 | 2.78E-01 | 2690 | -1.46 | 1.46E-01 | 1526 | -1.60 | 1.10E-01 | 2020 | -2.24 | 2.51E-02 | 7836 |
| <i>PCSK5</i>          | rs1023181  | G | A | 0.29 | 2.24  | 2.54E-02 | 1600 | 0.15  | 8.83E-01 | 2693 | 0.51  | 6.12E-01 | 1541 | 1.81  | 6.97E-02 | 2020 | 2.24  | 2.51E-02 | 7854 |
| <i>ABCG5</i>          | rs1864814  | A | G | 0.04 | 1.98  | 4.82E-02 | 1600 | 1.44  | 1.51E-01 | 2693 | 1.62  | 1.05E-01 | 1544 | -0.42 | 6.71E-01 | 2020 | 2.24  | 2.53E-02 | 7857 |
| <i>ABCA1</i>          | rs2065412  | G | A | 0.37 | -2.00 | 4.52E-02 | 1600 | -0.78 | 4.35E-01 | 2693 | -0.79 | 4.27E-01 | 1543 | -1.03 | 3.03E-01 | 2020 | -2.24 | 2.55E-02 | 7856 |
| <i>HNF4A</i>          | rs717248   | G | A | 0.05 | 0.83  | 4.05E-01 | 1600 | 3.13  | 1.75E-03 | 2693 | 0.72  | 4.74E-01 | 1544 | -0.58 | 5.63E-01 | 2020 | 2.23  | 2.56E-02 | 7857 |
| <i>LPL</i>            | rs11570892 | G | A | 0.17 | 1.26  | 2.08E-01 | 1600 | 1.29  | 1.97E-01 | 2693 | 0.75  | 4.55E-01 | 1544 | 1.14  | 2.55E-01 | 2020 | 2.23  | 2.57E-02 | 7857 |
| <i>PCSK5</i>          | rs10781328 | A | G | 0.10 | -1.82 | 6.88E-02 | 1597 | -2.02 | 4.34E-02 | 2687 | 0.29  | 7.71E-01 | 1532 | -0.67 | 5.01E-01 | 2018 | -2.22 | 2.66E-02 | 7834 |
| <i>LPL</i>            | rs1059507  | A | G | 0.16 | 1.23  | 2.18E-01 | 1600 | 1.24  | 2.17E-01 | 2692 | 0.81  | 4.20E-01 | 1543 | 1.14  | 2.55E-01 | 2020 | 2.21  | 2.69E-02 | 7855 |
| <i>NFKB1</i>          | rs4698860  | G | A | 0.31 | 1.74  | 8.24E-02 | 1600 | 1.03  | 3.02E-01 | 2693 | 0.53  | 5.93E-01 | 1540 | 1.15  | 2.52E-01 | 2020 | 2.21  | 2.73E-02 | 7853 |
| <i>LIPC</i>           | rs4775046  | A | G | 0.49 | -1.33 | 1.84E-01 | 1600 | -0.76 | 4.50E-01 | 2693 | -0.48 | 6.32E-01 | 1541 | -1.87 | 6.15E-02 | 2019 | -2.20 | 2.76E-02 | 7853 |
| <i>RXRA</i>           | rs4842198  | A | G | 0.25 | -1.62 | 1.06E-01 | 1569 | -0.49 | 6.27E-01 | 2654 | -1.14 | 2.57E-01 | 1378 | -1.36 | 1.75E-01 | 2014 | -2.20 | 2.77E-02 | 7615 |
| <i>CETP</i>           | rs1801706  | A | G | 0.17 | 3.36  | 7.73E-04 | 1600 | -0.50 | 6.20E-01 | 2693 | 0.67  | 5.06E-01 | 1544 | 1.32  | 1.87E-01 | 2019 | 2.19  | 2.84E-02 | 7856 |
| <i>FADS1/2/3</i>      | rs509360   | A | G | 0.38 | -0.39 | 6.97E-01 | 1600 | 1.57  | 1.16E-01 | 2693 | 0.47  | 6.38E-01 | 1541 | 2.44  | 1.47E-02 | 2020 | 2.19  | 2.86E-02 | 7854 |
| <i>NFKB1</i>          | rs4698862  | G | A | 0.31 | 1.65  | 9.95E-02 | 1599 | 1.03  | 3.04E-01 | 2692 | 0.54  | 5.91E-01 | 1540 | 1.19  | 2.36E-01 | 2018 | 2.19  | 2.89E-02 | 7849 |
| <i>LIPC</i>           | rs8028759  | G | A | 0.35 | 2.02  | 4.38E-02 | 1600 | -0.06 | 9.54E-01 | 2693 | 1.80  | 7.17E-02 | 1543 | 1.00  | 3.16E-01 | 2020 | 2.18  | 2.91E-02 | 7856 |
| <i>PON1/2/3/4</i>     | rs2375005  | T | A | 0.46 | -0.63 | 5.26E-01 | 1600 | -0.22 | 8.29E-01 | 2693 | 3.00  | 2.73E-03 | 1540 | 2.50  | 1.25E-02 | 2019 | 2.18  | 2.92E-02 | 7852 |
| <i>PCSK6</i>          | rs4965836  | G | C | 0.09 | -0.24 | 8.13E-01 | 1599 | -1.04 | 2.99E-01 | 2692 | -1.30 | 1.93E-01 | 1543 | -1.75 | 8.06E-02 | 2020 | -2.18 | 2.94E-02 | 7854 |
| <i>SCARB1</i>         | rs838896   | C | G | 0.33 | -0.44 | 6.57E-01 | 1598 | -0.56 | 5.75E-01 | 2688 | -4.55 | 5.89E-06 | 1537 | 0.70  | 4.81E-01 | 2020 | -2.18 | 2.95E-02 | 7843 |
| <i>LRP1</i>           | rs4759277  | A | C | 0.35 | -0.48 | 6.32E-01 | 1600 | -1.79 | 7.31E-02 | 2693 | -0.85 | 3.97E-01 | 1544 | -1.05 | 2.94E-01 | 2019 | -2.17 | 2.98E-02 | 7856 |
| <i>ABCB11</i>         | rs494874   | A | G | 0.31 | -0.81 | 4.17E-01 | 1600 | 2.02  | 4.36E-02 | 2688 | 0.60  | 5.49E-01 | 1540 | 2.15  | 3.16E-02 | 2019 | 2.17  | 3.00E-02 | 7847 |
| <i>MMAB/MVK</i>       | rs10850432 | A | G | 0.03 | -1.32 | 1.88E-01 | 1600 | -1.27 | 2.06E-01 | 2693 | -0.92 | 3.58E-01 | 1543 | -0.84 | 4.02E-01 | 2020 | -2.17 | 3.02E-02 | 7856 |
| <i>PCSK5</i>          | rs2066185  | C | G | 0.46 | -1.76 | 7.89E-02 | 1600 | -1.14 | 2.54E-01 | 2693 | -0.54 | 5.90E-01 | 1542 | -0.92 | 3.58E-01 | 2020 | -2.17 | 3.03E-02 | 7855 |
| <i>TAP2</i>           | rs4148871  | A | G | 0.20 | -0.86 | 3.90E-01 | 1600 | -1.25 | 2.10E-01 | 2693 | -0.93 | 3.51E-01 | 1536 | -1.24 | 2.16E-01 | 2018 | -2.16 | 3.06E-02 | 7847 |
| <i>NFKB1</i>          | rs4698863  | A | G | 0.31 | 1.64  | 1.02E-01 | 1600 | 1.01  | 3.13E-01 | 2693 | 0.53  | 5.95E-01 | 1543 | 1.17  | 2.43E-01 | 2018 | 2.16  | 3.10E-02 | 7854 |
| <i>SCARB1</i>         | rs12819677 | A | G | 0.45 | -3.45 | 5.68E-04 | 1600 | -0.99 | 3.22E-01 | 2693 | 0.93  | 3.51E-01 | 1538 | -0.85 | 3.96E-01 | 2019 | -2.15 | 3.13E-02 | 7850 |
| <i>APOE/C1/C2</i>     | rs769450   | A | G | 0.40 | 1.51  | 1.32E-01 | 1599 | 2.48  | 1.31E-02 | 2689 | -0.18 | 8.59E-01 | 1544 | 0.20  | 8.44E-01 | 2020 | 2.15  | 3.13E-02 | 7852 |

|                       |            |   |   |      |       |          |      |       |          |      |       |          |      |       |          |      |       |          |      |
|-----------------------|------------|---|---|------|-------|----------|------|-------|----------|------|-------|----------|------|-------|----------|------|-------|----------|------|
| <i>ABCA1</i>          | rs10115928 | A | G | 0.42 | -1.51 | 1.31E-01 | 1598 | -0.98 | 3.29E-01 | 2693 | -0.19 | 8.48E-01 | 1542 | -1.60 | 1.09E-01 | 2020 | -2.15 | 3.15E-02 | 7853 |
| <i>PAFAH1B2</i>       | rs12291885 | G | A | 0.04 | 1.38  | 1.67E-01 | 1600 | 2.10  | 3.56E-02 | 2675 | 1.04  | 2.98E-01 | 1544 | -0.35 | 7.24E-01 | 2018 | 2.14  | 3.28E-02 | 7837 |
| <i>ABCA1</i>          | rs2575875  | A | G | 0.42 | -1.45 | 1.47E-01 | 1600 | -0.91 | 3.65E-01 | 2693 | -0.04 | 9.68E-01 | 1543 | -1.82 | 6.92E-02 | 2019 | -2.13 | 3.36E-02 | 7855 |
| <i>SCARB1</i>         | rs838893   | A | G | 0.31 | -0.33 | 7.39E-01 | 1600 | -0.66 | 5.12E-01 | 2693 | -3.95 | 8.32E-05 | 1538 | 0.30  | 7.65E-01 | 2020 | -2.13 | 3.36E-02 | 7851 |
| <i>LIPC</i>           | rs17269264 | A | G | 0.47 | -1.23 | 2.19E-01 | 1600 | -0.88 | 3.79E-01 | 2693 | -0.46 | 6.48E-01 | 1543 | 1.68  | 9.29E-02 | 2020 | -2.12 | 3.37E-02 | 7856 |
| <i>PCSK5</i>          | rs2275406  | A | G | 0.10 | -1.82 | 6.86E-02 | 1596 | -1.84 | 6.63E-02 | 2693 | -0.07 | 9.41E-01 | 1537 | -0.38 | 7.03E-01 | 2020 | -2.12 | 3.37E-02 | 7846 |
| <i>LPL</i>            | rs270      | A | C | 0.14 | -1.31 | 1.91E-01 | 1600 | -0.89 | 3.76E-01 | 2693 | -0.31 | 7.56E-01 | 1540 | -1.71 | 8.70E-02 | 2020 | -2.11 | 3.45E-02 | 7853 |
| <i>PLTP</i>           | rs6065904  | A | G | 0.22 | -2.33 | 2.00E-02 | 1599 | -0.29 | 7.72E-01 | 2693 | 0.14  | 8.90E-01 | 1542 | -1.88 | 5.97E-02 | 2020 | -2.11 | 3.46E-02 | 7854 |
| <i>PLTP</i>           | rs4810479  | G | A | 0.27 | -2.14 | 3.22E-02 | 1599 | -0.16 | 8.73E-01 | 2693 | 0.47  | 6.39E-01 | 1543 | -2.48 | 1.33E-02 | 2018 | -2.11 | 3.51E-02 | 7853 |
| <i>PCSK6</i>          | rs2220055  | A | G | 0.10 | -0.25 | 8.02E-01 | 1600 | -0.50 | 6.16E-01 | 2693 | -1.62 | 1.05E-01 | 1541 | -1.93 | 5.32E-02 | 2020 | -2.11 | 3.52E-02 | 7854 |
| <i>NFKB1</i>          | rs230542   | A | G | 0.32 | 1.50  | 1.33E-01 | 1600 | 0.58  | 5.60E-01 | 2693 | 0.26  | 7.96E-01 | 1537 | 1.89  | 5.87E-02 | 2020 | 2.09  | 3.63E-02 | 7850 |
| <i>APOA1/A4/A5/C3</i> | rs12099358 | A | C | 0.18 | 1.24  | 2.14E-01 | 1600 | 1.99  | 4.62E-02 | 2693 | 0.79  | 4.30E-01 | 1544 | 0.03  | 9.78E-01 | 2020 | 2.09  | 3.65E-02 | 7857 |
| <i>LIPC</i>           | rs11853726 | G | A | 0.41 | -0.14 | 8.92E-01 | 1600 | 2.60  | 9.30E-03 | 2690 | -0.01 | 9.95E-01 | 1544 | 1.25  | 2.11E-01 | 2008 | 2.09  | 3.65E-02 | 7842 |
| <i>ABCA1</i>          | rs10120087 | A | C | 0.13 | 1.27  | 2.04E-01 | 1600 | 0.87  | 3.83E-01 | 2693 | 1.48  | 1.39E-01 | 1544 | 0.69  | 4.91E-01 | 2020 | 2.09  | 3.66E-02 | 7857 |
| <i>PPARD</i>          | rs9658085  | G | A | 0.08 | 1.65  | 9.89E-02 | 1600 | 1.96  | 5.07E-02 | 2693 | 0.98  | 3.25E-01 | 1543 | -0.47 | 6.40E-01 | 2020 | 2.09  | 3.68E-02 | 7856 |
| <i>PAFAH1B2</i>       | rs10790175 | A | G | 0.29 | 2.69  | 7.22E-03 | 1600 | 2.26  | 2.38E-02 | 2693 | -0.75 | 4.51E-01 | 1540 | -0.23 | 8.19E-01 | 2020 | 2.09  | 3.70E-02 | 7853 |
| <i>PPARD</i>          | rs4713854  | C | A | 0.09 | 1.37  | 1.72E-01 | 1600 | 2.98  | 2.94E-03 | 2692 | -1.04 | 2.99E-01 | 1541 | 0.36  | 7.16E-01 | 2020 | 2.08  | 3.74E-02 | 7853 |
| <i>NFKB1</i>          | rs17033014 | G | A | 0.31 | 1.75  | 8.04E-02 | 1600 | 0.98  | 3.28E-01 | 2693 | 0.46  | 6.48E-01 | 1543 | 0.98  | 3.29E-01 | 2018 | 2.06  | 3.95E-02 | 7854 |
| <i>PAFAH1B2</i>       | rs4938349  | G | A | 0.29 | 2.69  | 7.06E-03 | 1599 | 2.11  | 3.47E-02 | 2693 | -0.68 | 4.98E-01 | 1539 | -0.19 | 8.51E-01 | 2020 | 2.06  | 3.97E-02 | 7851 |
| <i>NFKB1</i>          | rs4698861  | G | A | 0.31 | 1.94  | 5.25E-02 | 1600 | 0.73  | 4.63E-01 | 2693 | 0.44  | 6.57E-01 | 1539 | 1.09  | 2.75E-01 | 2020 | 2.06  | 3.98E-02 | 7852 |
| <i>SCARB1</i>         | rs7134858  | A | G | 0.08 | 1.27  | 2.06E-01 | 1600 | 1.12  | 2.64E-01 | 2693 | 1.93  | 5.41E-02 | 1544 | -0.05 | 9.63E-01 | 2019 | 2.06  | 3.98E-02 | 7856 |
| <i>CUBN</i>           | rs10904881 | A | C | 0.41 | 0.29  | 7.71E-01 | 1595 | -1.20 | 2.31E-01 | 2690 | -0.81 | 4.18E-01 | 1514 | -2.21 | 2.72E-02 | 2020 | -2.05 | 4.04E-02 | 7819 |
| <i>APOE/C1/C2</i>     | rs7257468  | A | G | 0.47 | 0.22  | 8.27E-01 | 1595 | 0.83  | 4.07E-01 | 2686 | 1.19  | 2.35E-01 | 1528 | 1.84  | 6.51E-02 | 2013 | 2.05  | 4.08E-02 | 7822 |
| <i>DGAT1</i>          | rs7827865  | A | C | 0.10 | -2.05 | 4.05E-02 | 1600 | -1.34 | 1.80E-01 | 2690 | -1.22 | 2.23E-01 | 1537 | 0.40  | 6.87E-01 | 2020 | -2.05 | 4.09E-02 | 7847 |
| <i>APOA2</i>          | rs4073054  | C | A | 0.37 | -1.39 | 1.66E-01 | 1600 | -1.56 | 1.19E-01 | 2693 | -0.09 | 9.25E-01 | 1544 | -0.91 | 3.64E-01 | 2020 | -2.04 | 4.12E-02 | 7857 |
| <i>PCSK5</i>          | rs4552981  | A | T | 0.46 | 2.55  | 1.09E-02 | 1600 | 1.33  | 1.82E-01 | 2693 | 0.56  | 5.74E-01 | 1544 | -0.27 | 7.84E-01 | 2019 | 2.04  | 4.13E-02 | 7856 |
| <i>FAS</i>            | rs9658742  | G | C | 0.47 | -0.61 | 5.44E-01 | 1581 | -0.80 | 4.22E-01 | 2625 | -2.29 | 2.24E-02 | 1526 | -0.56 | 5.78E-01 | 2012 | -2.04 | 4.14E-02 | 7744 |

|                       |            |   |   |      |       |          |      |       |          |      |       |          |      |       |          |      |       |          |      |
|-----------------------|------------|---|---|------|-------|----------|------|-------|----------|------|-------|----------|------|-------|----------|------|-------|----------|------|
| <i>LRP2</i>           | rs1003456  | T | A | 0.20 | 0.67  | 5.02E-01 | 1600 | 1.31  | 1.91E-01 | 2693 | -0.38 | 7.02E-01 | 1542 | 2.25  | 2.46E-02 | 2020 | 2.04  | 4.15E-02 | 7855 |
| <i>ABCA1</i>          | rs2515617  | A | G | 0.43 | 0.54  | 5.86E-01 | 1599 | -0.90 | 3.67E-01 | 2693 | -1.80 | 7.16E-02 | 1543 | -1.88 | 6.00E-02 | 2020 | -2.03 | 4.19E-02 | 7855 |
| <i>ABCB11</i>         | rs552976   | A | G | 0.34 | -0.88 | 3.78E-01 | 1600 | 1.96  | 4.96E-02 | 2693 | 0.45  | 6.51E-01 | 1544 | 2.13  | 3.28E-02 | 2020 | 2.03  | 4.19E-02 | 7857 |
| <i>LPL</i>            | rs281      | T | A | 0.29 | -0.51 | 6.12E-01 | 1595 | -1.41 | 1.60E-01 | 2690 | -0.47 | 6.37E-01 | 1522 | -1.52 | 1.29E-01 | 2018 | -2.03 | 4.21E-02 | 7825 |
| <i>PPARD</i>          | rs3734254  | G | A | 0.26 | 1.58  | 1.15E-01 | 1574 | 1.79  | 7.30E-02 | 2671 | -0.40 | 6.87E-01 | 1537 | 0.89  | 3.73E-01 | 2019 | 2.03  | 4.22E-02 | 7801 |
| <i>NFKB1</i>          | rs11733749 | C | A | 0.32 | 1.35  | 1.77E-01 | 1574 | 1.02  | 3.08E-01 | 2656 | 0.44  | 6.64E-01 | 1513 | 1.24  | 2.14E-01 | 2017 | 2.03  | 4.24E-02 | 7760 |
| <i>LIPC</i>           | rs934296   | G | A | 0.04 | 2.35  | 1.86E-02 | 1583 | 0.13  | 9.00E-01 | 2665 | 0.40  | 6.89E-01 | 1513 | 1.41  | 1.59E-01 | 2019 | 2.03  | 4.24E-02 | 7780 |
| <i>TRIB1</i>          | rs6982636  | A | G | 0.45 | 0.68  | 4.94E-01 | 1598 | 1.44  | 1.50E-01 | 2689 | 2.05  | 4.11E-02 | 1532 | -0.05 | 9.58E-01 | 2020 | 2.03  | 4.26E-02 | 7839 |
| <i>ABCA1</i>          | rs1831554  | A | G | 0.06 | 1.03  | 3.04E-01 | 1599 | 0.45  | 6.54E-01 | 2693 | 1.04  | 2.98E-01 | 1543 | 1.64  | 1.01E-01 | 2020 | 2.02  | 4.34E-02 | 7855 |
| <i>CUBN</i>           | rs3740163  | T | A | 0.02 | 1.79  | 7.42E-02 | 1600 | 0.70  | 4.84E-01 | 2692 | 1.93  | 5.44E-02 | 1544 | -0.10 | 9.18E-01 | 2020 | 2.02  | 4.37E-02 | 7856 |
| <i>APOA1/A4/A5/C3</i> | rs4417316  | A | G | 0.09 | 1.58  | 1.14E-01 | 1600 | 1.92  | 5.54E-02 | 2693 | 1.78  | 7.46E-02 | 1544 | -1.21 | 2.26E-01 | 2020 | 2.01  | 4.43E-02 | 7857 |
| <i>NFKB1</i>          | rs230532   | A | T | 0.32 | 1.78  | 7.49E-02 | 1599 | 0.28  | 7.80E-01 | 2692 | 0.22  | 8.24E-01 | 1538 | 1.86  | 6.25E-02 | 2020 | 2.01  | 4.43E-02 | 7849 |
| <i>CUBN</i>           | rs5015063  | C | A | 0.09 | 0.76  | 4.45E-01 | 1599 | 1.28  | 1.99E-01 | 2693 | 2.35  | 1.87E-02 | 1544 | -0.25 | 8.00E-01 | 2020 | 2.01  | 4.44E-02 | 7856 |
| <i>LCAT</i>           | rs7200210  | G | A | 0.08 | 0.99  | 3.23E-01 | 1600 | -2.56 | 1.04E-02 | 2693 | -1.05 | 2.94E-01 | 1544 | -0.96 | 3.36E-01 | 2019 | -2.01 | 4.48E-02 | 7856 |
| <i>LPL</i>            | rs9644636  | C | A | 0.29 | -0.44 | 6.60E-01 | 1593 | -0.93 | 3.54E-01 | 2687 | -1.48 | 1.39E-01 | 1537 | -1.20 | 2.30E-01 | 2020 | -2.01 | 4.49E-02 | 7837 |
| <i>ABCG1</i>          | rs225443   | A | G | 0.38 | 0.16  | 8.72E-01 | 1600 | 1.82  | 6.97E-02 | 2693 | 1.35  | 1.79E-01 | 1544 | 0.53  | 5.95E-01 | 2020 | 2.00  | 4.55E-02 | 7857 |
| <i>ABCB11</i>         | rs2544367  | A | G | 0.46 | -0.35 | 7.28E-01 | 1585 | 0.80  | 4.23E-01 | 2673 | -0.65 | 5.18E-01 | 1504 | 3.87  | 1.11E-04 | 2016 | 2.00  | 4.59E-02 | 7778 |
| <i>APOE/C1/C2</i>     | rs439401   | A | G | 0.37 | 2.04  | 4.16E-02 | 1578 | 1.39  | 1.65E-01 | 2638 | 0.97  | 3.30E-01 | 1510 | -0.33 | 7.44E-01 | 2020 | 1.99  | 4.62E-02 | 7746 |
| <i>RXRA</i>           | rs7853153  | A | G | 0.04 | 2.19  | 2.89E-02 | 1600 | 2.07  | 3.89E-02 | 2691 | -0.24 | 8.11E-01 | 1541 | -0.19 | 8.49E-01 | 2020 | 1.99  | 4.63E-02 | 7852 |
| <i>PCSK5</i>          | rs10781325 | C | A | 0.33 | -0.47 | 6.37E-01 | 1600 | -1.19 | 2.33E-01 | 2693 | -1.32 | 1.89E-01 | 1544 | -0.97 | 3.32E-01 | 2020 | -1.99 | 4.69E-02 | 7857 |
| <i>PPARA</i>          | rs5766741  | G | A | 0.28 | -1.16 | 2.45E-01 | 1600 | 2.20  | 2.80E-02 | 2692 | 1.85  | 6.45E-02 | 1542 | 0.79  | 4.27E-01 | 2020 | 1.98  | 4.73E-02 | 7854 |
| <i>LIPC</i>           | rs1869138  | G | A | 0.09 | 0.73  | 4.66E-01 | 1600 | 0.03  | 9.79E-01 | 2691 | 1.41  | 1.59E-01 | 1541 | 1.99  | 4.65E-02 | 2020 | 1.98  | 4.80E-02 | 7852 |
| <i>ABCB11</i>         | rs853779   | C | A | 0.47 | -0.45 | 6.53E-01 | 1600 | 0.98  | 3.27E-01 | 2693 | -0.40 | 6.90E-01 | 1544 | 3.52  | 4.38E-04 | 2018 | 1.98  | 4.81E-02 | 7855 |
| <i>ABCA1</i>          | rs2777784  | G | A | 0.42 | -1.24 | 2.16E-01 | 1600 | -0.81 | 4.19E-01 | 2692 | -0.07 | 9.46E-01 | 1540 | -1.80 | 7.17E-02 | 2020 | -1.98 | 4.82E-02 | 7852 |
| <i>LCAT</i>           | rs20549    | G | A | 0.22 | 0.81  | 4.16E-01 | 1600 | -0.15 | 8.80E-01 | 2693 | 2.20  | 2.82E-02 | 1543 | 1.43  | 1.54E-01 | 2020 | 1.97  | 4.84E-02 | 7856 |
| <i>APOE/C1/C2</i>     | rs3760627  | G | A | 0.47 | 0.16  | 8.74E-01 | 1600 | 0.77  | 4.44E-01 | 2693 | 1.12  | 2.65E-01 | 1542 | 1.89  | 5.88E-02 | 2020 | 1.97  | 4.86E-02 | 7855 |
| <i>RXRA</i>           | rs11102986 | A | G | 0.18 | -0.26 | 7.93E-01 | 1599 | -1.96 | 4.98E-02 | 2692 | -0.91 | 3.62E-01 | 1541 | -0.59 | 5.56E-01 | 2020 | -1.97 | 4.89E-02 | 7852 |

|                                                                                                                 |           |   |   |      |      |          |      |       |          |      |       |          |      |       |          |      |       |          |      |
|-----------------------------------------------------------------------------------------------------------------|-----------|---|---|------|------|----------|------|-------|----------|------|-------|----------|------|-------|----------|------|-------|----------|------|
| APOA1/A4/A5/C3                                                                                                  | rs2075290 | G | A | 0.08 | 0.24 | 8.09E-01 | 1600 | -1.11 | 2.66E-01 | 2693 | -1.39 | 1.66E-01 | 1544 | -1.60 | 1.09E-01 | 2019 | -1.97 | 4.91E-02 | 7856 |
| A, allele; MAF, Minor allele frequency from Penn-RC; T, T-statistic; P, P-value; Z, Z-statistic; N, Sample size |           |   |   |      |      |          |      |       |          |      |       |          |      |       |          |      |       |          |      |

| Supplemental Table 4. Nonsynonymous SNPs associated with HDL-C |            |    |    |      |       |          |      |            |
|----------------------------------------------------------------|------------|----|----|------|-------|----------|------|------------|
| Locus                                                          | SNP        | A1 | A2 | MAF  | Z     | P        | N    | AA Change  |
| <i>LPL</i>                                                     | rs328      | G  | C  | 0.10 | -6.68 | 2.45E-11 | 7857 | S474X      |
| <i>CETP</i>                                                    | rs1800777  | A  | G  | 0.03 | -6.55 | 5.84E-11 | 7852 | R468Q      |
| <i>CETP</i>                                                    | rs5880     | C  | G  | 0.04 | -6.54 | 6.24E-11 | 7857 | A390P      |
| <i>CETP</i>                                                    | rs5882     | G  | A  | 0.34 | -4.78 | 1.76E-06 | 7855 | V422I      |
| <i>LPL</i>                                                     | rs268      | G  | A  | 0.01 | 4.55  | 5.38E-06 | 7855 | N318S      |
| <i>LIPG</i>                                                    | rs77960347 | G  | A  | 0.01 | -4.22 | 2.48E-05 | 7857 | N396S      |
| <i>APOA1/A4/A5/C3</i>                                          | rs12287066 | A  | C  | 0.08 | -4.02 | 5.87E-05 | 7850 | APOA5 I44M |
| <i>APOB</i>                                                    | rs1801695  | A  | G  | 0.03 | 3.95  | 7.80E-05 | 7857 | A4481T     |
| <i>PON1/2/3/4</i>                                              | rs7493     | G  | C  | 0.24 | -3.46 | 5.42E-04 | 7855 | PON2 S311C |
| <i>PON1/2/3/4</i>                                              | rs12026    | C  | G  | 0.24 | 3.45  | 5.72E-04 | 7854 | PON2 A148G |
| <i>APOB</i>                                                    | rs1801699  | G  | A  | 0.02 | 3.12  | 1.80E-03 | 7853 | N1914S     |
| <i>APOE/C1/C2</i>                                              | rs5167     | C  | A  | 0.37 | -3.10 | 1.94E-03 | 7855 | APOC4 L96R |
| <i>APOB</i>                                                    | rs676210   | A  | G  | 0.21 | 3.09  | 1.97E-03 | 7856 | P2739R     |
| <i>PON1/2/3/4</i>                                              | rs13226149 | A  | G  | 0.27 | 2.92  | 3.50E-03 | 7851 | PON3 F21L  |
| <i>APOB</i>                                                    | rs1042034  | G  | A  | 0.21 | -2.91 | 3.65E-03 | 7854 | S4338N     |
| <i>LRP2</i>                                                    | rs34291900 | A  | G  | 0.03 | -2.75 | 5.95E-03 | 7857 | G669D      |
| <i>ABCA1</i>                                                   | rs2230808  | A  | G  | 0.30 | -2.69 | 7.17E-03 | 7856 | K1587R     |
| <i>ABCA1</i>                                                   | rs4149313  | G  | A  | 0.17 | -2.55 | 1.07E-02 | 7856 | I883M      |

|                                                                                                                 |       |   |   |      |       |          |      |             |
|-----------------------------------------------------------------------------------------------------------------|-------|---|---|------|-------|----------|------|-------------|
| APOA1/A4/A5/C3                                                                                                  | rs675 | T | A | 0.19 | -2.26 | 2.36E-02 | 7854 | APOA4 T367S |
| A, allele; MAF, Minor allele frequency from Penn-RC; T, T-statistic; P, P-value; Z, Z-statistic; N, Sample size |       |   |   |      |       |          |      |             |



Supplemental Table 5. Replication of Prior Confirmed Loci

| Gene                  | SNP        | Proxy     | R <sup>2</sup> | Penn-CC  |      | Penn-RC  |      | MONICA/KORA |      | GRAPHIC  |      | Meta-analysis |      |     | Reference     |
|-----------------------|------------|-----------|----------------|----------|------|----------|------|-------------|------|----------|------|---------------|------|-----|---------------|
|                       |            |           |                | P        | N    | P        | N    | P           | N    | P        | N    | P             | N    | D   |               |
| <i>ABCA1</i>          | rs1883025  |           |                | 1.41E-02 | 1599 | 1.71E-01 | 2693 | 3.94E-01    | 1544 | 8.86E-03 | 2020 | 3.02E-04      | 7856 | -   | 22, 24        |
| <i>ABCA1</i>          | rs3905000  | rs3890182 | 1              | 5.27E-02 | 1600 | 3.75E-01 | 2692 | 1.21E-02    | 1543 | 8.56E-02 | 2020 | 7.33E-04      | 7855 | -   | 34            |
| <i>ABCA1</i>          | rs3890182  |           |                | 5.27E-02 | 1600 | 3.75E-01 | 2692 | 1.21E-02    | 1543 | 8.56E-02 | 2020 | 7.33E-04      | 7855 | -   | 21            |
| <i>ABCA1</i>          | rs4149268  | rs4149269 | 1              | 1.01E-01 | 1600 | 1.72E-01 | 2662 | 7.09E-01    | 1544 | 1.56E-01 | 2020 | 1.54E-02      | 7826 | +   | 9             |
| <i>ABCA1</i>          | rs11789603 |           |                | 8.60E-01 | 1600 | 6.48E-01 | 2693 | 2.29E-02    | 1544 | 3.47E-01 | 2020 | 6.69E-02      | 7857 | +   | 24            |
| <i>ABCA1</i>          | rs2515614  | rs2472509 | 1              | 9.60E-01 | 1600 | 1.79E-01 | 2693 | 3.72E-01    | 1539 | 9.82E-01 | 2020 | 2.51E-01      | 7852 | +/- | 23            |
| <i>ANGPTL4</i>        | rs7255436  | rs2278236 | 1              | 2.42E-01 | 1600 | 4.54E-01 | 2693 | 1.38E-01    | 1544 | 9.93E-01 | 2020 | 1.05E-01      | 7857 | +   | 24            |
| <i>ANGPTL4</i>        | rs2967605  | NA        |                | NA       | NA   | NA       | NA   | NA          | NA   | NA       | NA   | NA            | NA   | NA  | 22            |
| <i>APOA1-C3-A4-A5</i> | rs618923   | rs619054  | 0.955          | 5.27E-02 | 1586 | 3.94E-02 | 2676 | 8.96E-01    | 1523 | 5.51E-01 | 2018 | 2.01E-02      | 7803 | +   | 23            |
| <i>APOA1-C3-A4-A5</i> | rs12225230 |           |                | 1.54E-01 | 1599 | 1.69E-01 | 2692 | 5.41E-01    | 1544 | 8.06E-01 | 2020 | 1.11E-01      | 7855 | +   | 24            |
| <i>APOA1-C3-A4-A5</i> | rs964184   | NA        |                | NA       | NA   | NA       | NA   | NA          | NA   | NA       | NA   | NA            | NA   | NA  | 22, 24        |
| <i>APOA1-C3-A4-A5</i> | rs28927680 | NA        |                | NA       | NA   | NA       | NA   | NA          | NA   | NA       | NA   | NA            | NA   | NA  | 21            |
| <i>APOB</i>           | rs1042034  |           |                | 6.56E-03 | 1600 | 4.61E-01 | 2692 | 8.43E-02    | 1542 | 3.40E-01 | 2020 | 3.65E-03      | 7854 | -   | 24            |
| <i>APOB</i>           | rs6754295  | rs1042034 | 0.857          | 6.56E-03 | 1600 | 4.61E-01 | 2692 | 8.43E-02    | 1542 | 3.40E-01 | 2020 | 3.65E-03      | 7854 | -   | 34            |
| <i>APOE-C1-C2</i>     | rs5167     |           |                | 2.45E-01 | 1600 | 7.34E-01 | 2692 | 3.30E-03    | 1543 | NA       | NA   | 1.94E-03      | 7855 | -   | 24            |
| <i>APOE-C1-C2</i>     | rs769449   | NA        |                | NA       | NA   | NA       | NA   | NA          | NA   | NA       | NA   | NA            | NA   | NA  | 23            |
| <i>APOE-C1-C2</i>     | rs4420638  | NA        |                | NA       | NA   | NA       | NA   | NA          | NA   | NA       | NA   | NA            | NA   | NA  | 24            |
| <i>CETP</i>           | rs3764261  |           |                | 7.82E-14 | 1600 | 8.94E-10 | 2693 | 6.36E-12    | 1542 | 4.77E-15 | 2019 | 2.15E-44      | 7854 | +   | 9, 24, 36, 37 |
| <i>CETP</i>           | rs173539   | rs3764261 | 1              | 7.82E-14 | 1600 | 8.94E-10 | 2693 | 6.36E-12    | 1542 | 4.77E-15 | 2019 | 2.15E-44      | 7854 | +   | 22            |
| <i>CETP</i>           | rs1800775  |           |                | 1.40E-14 | 1600 | 2.04E-08 | 2693 | 7.14E-09    | 1536 | 4.95E-11 | 2020 | 1.06E-36      | 7849 | +   | 21, 24        |
| <i>CETP</i>           | rs1532624  |           |                | 2.03E-13 | 1600 | 3.68E-05 | 2693 | 8.81E-10    | 1543 | 2.43E-12 | 2020 | 3.50E-33      | 7856 | +   | 34            |
| <i>CETP</i>           | rs1864163  |           |                | 1.66E-14 | 1598 | 3.05E-06 | 2692 | 2.48E-10    | 1541 | 1.32E-08 | 2020 | 1.47E-32      | 7851 | -   | 9             |

|                   |            |            |       |          |      |          |      |          |      |          |      |          |      |     |                |
|-------------------|------------|------------|-------|----------|------|----------|------|----------|------|----------|------|----------|------|-----|----------------|
| <i>CETP</i>       | rs9939224  | rs7499892  | 1     | 8.01E-15 | 1600 | 1.10E-08 | 2693 | 2.18E-07 | 1542 | 2.36E-07 | 2018 | 5.62E-32 | 7853 | -   | 24             |
| <i>CETP</i>       | rs9989419  |            |       | NA       | NA   | 4.45E-02 | 2070 | NA       | NA   | NA       | NA   | 4.45E-02 | 2070 | -   | 9, 35          |
| <i>CETP</i>       | rs12596776 | rs13306677 | 1     | 4.02E-01 | 1600 | 4.22E-01 | 2669 | 7.87E-01 | 1542 | 4.41E-01 | 2020 | 1.74E-01 | 7831 | +   | 9              |
| <i>CETP</i>       | rs1566439  | NA         |       | NA       | NA   | NA  | 9              |
| <i>CTCF-PRMT8</i> | rs2271293  | rs2292318  | 0.915 | 9.96E-01 | 1600 | 2.24E-01 | 2693 | 1.33E-02 | 1509 | 1.76E-02 | 2020 | 2.62E-03 | 7822 | +   | 34             |
| <i>FADS1-2-3</i>  | rs174547   | rs1535     | 1     | 1.34E-03 | 1600 | 5.41E-03 | 2693 | 4.18E-01 | 1537 | 3.49E-03 | 2020 | 8.78E-07 | 7850 | +   | 22             |
| <i>FADS1-2-3</i>  | rs174601   |            |       | 8.12E-04 | 1599 | 3.44E-02 | 2689 | 4.26E-01 | 1543 | 7.34E-03 | 2020 | 8.11E-06 | 7851 | -   | 24             |
| <i>GALNT2</i>     | rs2144300  |            |       | 3.90E-02 | 1600 | 2.02E-02 | 2692 | 6.64E-01 | 1542 | 2.37E-01 | 2020 | 2.05E-03 | 7854 | +   | 9              |
| <i>GALNT2</i>     | rs4846914  |            |       | 3.90E-02 | 1600 | 2.23E-02 | 2691 | 7.19E-01 | 1541 | 2.35E-01 | 2019 | 2.44E-03 | 7851 | +   | 21, 22, 24     |
| <i>GRIN3A</i>     | rs1323432  |            |       | NA       | NA   | 7.52E-01 | 2067 | NA       | NA   | NA       | NA   | 7.52E-01 | 2067 | +   | 9              |
| <i>HNF4A</i>      | rs1800961  |            |       | 8.40E-02 | 1600 | 8.12E-01 | 2693 | 5.46E-01 | 1544 | 6.56E-02 | 2020 | 1.13E-01 | 7857 | -   | 22, 24         |
| <i>KLHL8</i>      | rs442177   | rs3775214  | 0.964 | 9.97E-01 | 1600 | 4.56E-01 | 2693 | 6.31E-01 | 1543 | NA       | NA   | 7.97E-01 | 5836 | -/+ | 24             |
| <i>LCAT</i>       | rs2271293  | rs2292318  | 0.915 | 9.96E-01 | 1600 | 2.24E-01 | 2693 | 1.33E-02 | 1509 | 1.76E-02 | 2020 | 2.62E-03 | 7822 | +   | 22             |
| <i>LCAT</i>       | rs16942887 | rs2292318  | 0.915 | 9.96E-01 | 1600 | 2.24E-01 | 2693 | 1.33E-02 | 1509 | 1.76E-02 | 2020 | 2.62E-03 | 7822 | +   | 24             |
| <i>LCAT</i>       | rs255052   |            |       | 8.85E-01 | 1599 | 2.41E-01 | 2692 | 6.42E-02 | 1538 | 7.57E-03 | 2019 | 3.44E-03 | 7848 | +   | 9              |
| <i>LCAT</i>       | rs255049   | NA         |       | NA       | NA   | NA  | 37             |
| <i>LILRA3</i>     | rs386000   | rs103294   | 0.832 | 6.41E-02 | 1600 | 3.89E-02 | 2693 | 2.89E-01 | 1544 | NA       | NA   | 3.54E-03 | 5837 | +   | 24             |
| <i>LIPC</i>       | rs2070895  |            |       | 9.35E-03 | 1600 | 1.18E-01 | 2693 | 5.16E-04 | 1541 | 1.50E-02 | 2020 | 1.17E-06 | 7854 | +   | 24             |
| <i>LIPC</i>       | rs1800588  |            |       | 1.11E-02 | 1600 | 1.85E-01 | 2692 | 5.64E-04 | 1541 | 8.70E-03 | 2019 | 1.75E-06 | 7852 | +   | 21, 23         |
| <i>LIPC</i>       | rs261332   |            |       | 9.11E-03 | 1600 | 1.82E-01 | 2692 | 4.16E-04 | 1544 | 1.34E-02 | 2019 | 1.79E-06 | 7855 | +   | 9              |
| <i>LIPC</i>       | rs4775041  |            |       | NA       | NA   | 3.18E-02 | 2071 | NA       | NA   | NA       | NA   | 3.18E-02 | 2071 | -   | 9              |
| <i>LIPC</i>       | rs10468017 | rs4775041  | 0.84  | NA       | NA   | 3.18E-02 | 2071 | NA       | NA   | NA       | NA   | 3.18E-02 | 2071 | -   | 22             |
| <i>LIPC</i>       | rs1532085  | NA         |       | NA       | NA   | NA  | 24, 34, 36, 37 |
| <i>LIPG</i>       | rs2156552  |            |       | 4.80E-05 | 1600 | 2.16E-02 | 2693 | 3.40E-01 | 1543 | 7.48E-04 | 2020 | 1.09E-07 | 7856 | -   | 9, 21          |
| <i>LIPG</i>       | rs4939883  | rs2156552  | 0.948 | 4.80E-05 | 1600 | 2.16E-02 | 2693 | 3.40E-01 | 1543 | 7.48E-04 | 2020 | 1.09E-07 | 7856 | -   | 34             |
| <i>LIPG</i>       | rs7241918  | rs2156552  | 0.948 | 4.80E-05 | 1600 | 2.16E-02 | 2693 | 3.40E-01 | 1543 | 7.48E-04 | 2020 | 1.09E-07 | 7856 | -   | 24             |

|                 |            |            |       |          |      |          |      |          |      |          |      |          |      |     |            |
|-----------------|------------|------------|-------|----------|------|----------|------|----------|------|----------|------|----------|------|-----|------------|
| <i>LIPG</i>     | rs7240405  | rs2156552  | 0.948 | 4.80E-05 | 1600 | 2.16E-02 | 2693 | 3.40E-01 | 1543 | 7.48E-04 | 2020 | 1.09E-07 | 7856 | -   | 35         |
| <i>LIPG</i>     | rs4939883  | rs2156552  | 0.948 | 4.80E-05 | 1600 | 2.16E-02 | 2693 | 3.40E-01 | 1543 | 7.48E-04 | 2020 | 1.09E-07 | 7856 | -   | 22, 23, 34 |
| <i>LIPG</i>     | rs2040293  | NA         |       | NA       | NA   | NA  | 24         |
| <i>LPA</i>      | rs1084651  |            |       | 1.57E-01 | 1600 | 7.67E-01 | 2693 | 7.09E-01 | 1541 | 7.19E-01 | 2020 | 4.27E-01 | 7854 | -   | 24         |
| <i>LPL</i>      | rs12678919 | rs12679834 | 0.861 | 3.32E-05 | 1598 | 1.83E-03 | 2691 | 2.10E-03 | 1538 | 1.28E-03 | 2013 | 2.18E-11 | 7840 | -   | 22, 24     |
| <i>LPL</i>      | rs17482753 | rs12679834 | 0.929 | 3.32E-05 | 1598 | 1.83E-03 | 2691 | 2.10E-03 | 1538 | 1.28E-03 | 2013 | 2.18E-11 | 7840 | -   | 35         |
| <i>LPL</i>      | rs328      |            |       | 1.99E-05 | 1600 | 1.42E-03 | 2693 | 3.62E-03 | 1544 | 1.68E-03 | 2020 | 2.45E-11 | 7857 | -   | 21         |
| <i>LPL</i>      | rs10503669 | rs328      | 1     | 1.99E-05 | 1600 | 1.42E-03 | 2693 | 3.62E-03 | 1544 | 1.68E-03 | 2020 | 2.45E-11 | 7857 | -   | 9          |
| <i>LPL</i>      | rs10096633 | rs328      | 0.929 | 1.99E-05 | 1600 | 1.42E-03 | 2693 | 3.62E-03 | 1544 | 1.68E-03 | 2020 | 2.45E-11 | 7857 | -   | 34         |
| <i>LPL</i>      | rs2083637  | rs13702    | 0.913 | 1.25E-06 | 1599 | 1.58E-03 | 2693 | 2.43E-02 | 1543 | 2.62E-03 | 2020 | 5.34E-11 | 7855 | -   | 34         |
| <i>LPL</i>      | rs331      |            |       | 2.20E-04 | 1600 | 1.04E-03 | 2693 | 4.48E-02 | 1539 | 6.45E-04 | 2020 | 5.40E-10 | 7852 | +   | 23         |
| <i>LPL</i>      | rs7016529  |            |       | 7.56E-03 | 1600 | 1.12E-01 | 2693 | 3.13E-01 | 1543 | 2.94E-02 | 2020 | 2.27E-04 | 7856 | +   | 24         |
| <i>LPL</i>      | rs2197089  |            |       | 8.26E-02 | 1592 | 1.96E-01 | 2681 | 1.17E-01 | 1534 | 2.62E-01 | 2019 | 5.05E-03 | 7826 | +   | 9          |
| <i>LPL</i>      | rs6586891  |            |       | NA       | NA   | 5.89E-02 | 2064 | NA       | NA   | NA       | NA   | 5.89E-02 | 2064 | +   | 9          |
| <i>LRP4</i>     | rs3136441  | rs5896     | 1     | 7.10E-01 | 1600 | 3.41E-03 | 2692 | 9.56E-01 | 1541 | NA       | NA   | 3.12E-02 | 5833 | +   | 24         |
| <i>MLXIPL</i>   | rs17145738 |            |       | 9.09E-01 | 1600 | 7.22E-02 | 2693 | 4.19E-02 | 1542 | NA       | NA   | 8.14E-01 | 5835 | -   | 24         |
| <i>MVK/MMAB</i> | rs7134594  | rs2338104  | 0.935 | 5.02E-01 | 1600 | 4.54E-02 | 2693 | 2.74E-02 | 1543 | 8.77E-01 | 2019 | 5.42E-02 | 7855 | -   | 24         |
| <i>MVK/MMAB</i> | rs2338104  |            |       | 5.02E-01 | 1600 | 4.54E-02 | 2693 | 2.74E-02 | 1543 | 8.77E-01 | 2019 | 5.42E-02 | 7855 | -   | 9, 22      |
| <i>NR1H3</i>    | rs7120118  | rs1375688  | 0.913 | 5.21E-01 | 1600 | 3.12E-03 | 2692 | 6.25E-01 | 1539 | 6.96E-01 | 2020 | 1.08E-01 | 7851 | +/- | 37         |
| <i>PGS1</i>     | rs4129767  | rs4082919  | 0.967 | 2.19E-01 | 1600 | 7.29E-01 | 2692 | 8.25E-01 | 1540 | NA       | NA   | 3.20E-01 | 5832 | +   | 24         |
| <i>PLTP</i>     | rs7679     | rs6073952  | 0.818 | 2.30E-01 | 1600 | 7.86E-01 | 2693 | 6.59E-01 | 1541 | 6.29E-02 | 2020 | 1.48E-01 | 7854 | -   | 22         |
| <i>PLTP</i>     | rs6065906  | rs6073952  | 0.877 | 2.30E-01 | 1600 | 7.86E-01 | 2693 | 6.59E-01 | 1541 | 6.29E-02 | 2020 | 1.48E-01 | 7854 | -   | 23, 24     |
| <i>SCARB1</i>   | rs838880   | rs838878   | 0.961 | 6.93E-02 | 1600 | 8.85E-02 | 2693 | 5.23E-02 | 1543 | 1.12E-01 | 2020 | 4.94E-04 | 7856 | +   | 24         |
| <i>STARD3</i>   | rs881844   |            |       | 1.66E-01 | 1600 | 7.32E-01 | 2692 | 2.80E-02 | 1543 | NA       | NA   | 1.05E-01 | 5835 | -/+ | 24         |
| <i>TRIB1</i>    | rs10808546 | rs17321515 | 0.932 | 4.62E-01 | 1600 | 1.18E-01 | 2693 | 1.52E-02 | 1544 | NA       | NA   | 2.21E-02 | 7857 | -   | 24         |
| <i>ZNF664</i>   | rs838880   | rs838878   | 0.961 | 6.93E-02 | 1600 | 8.85E-02 | 2693 | 5.23E-02 | 1543 | 1.12E-01 | 2020 | 4.94E-04 | 7856 | +   | 24         |
| <i>ZNF664</i>   | rs11057244 | NA         |       | NA       | NA   | NA  | 24         |

|              |            |    |  |    |    |    |    |    |    |    |    |    |    |    |    |
|--------------|------------|----|--|----|----|----|----|----|----|----|----|----|----|----|----|
| ZNF664       | rs4765127  | NA |  | NA | 24 |
| ABCA8        | rs4148008  | NA |  | NA | 24 |
| AMPD3        | rs2923084  | NA |  | NA | 24 |
| ARL15        | rs6450176  | NA |  | NA | 24 |
| C6orf106     | rs2814944  | NA |  | NA | 24 |
| CITED2       | rs605066   | NA |  | NA | 24 |
| CMIP         | rs2925979  | NA |  | NA | 24 |
| COBLL1/GRB14 | rs12328675 | NA |  | NA | 24 |
| COBLL1/GRB14 | rs10490694 | NA |  | NA | 23 |
| EVI5         | rs531514   | NA |  | NA | 24 |
| IRS1         | rs2972146  | NA |  | NA | 24 |
| KLF14        | rs4731702  | NA |  | NA | 24 |
| LACTB        | rs2652834  | NA |  | NA | 24 |
| LOC55908     | rs737337   | NA |  | NA | 24 |
| LRP1         | rs3741414  | NA |  | NA | 24 |
| MADD-FOLH1   | rs7395662  | NA |  | NA | 34 |
| MC4R         | rs12967135 | NA |  | NA | 24 |
| PABPC4       | rs4660293  | NA |  | NA | 24 |
| PDE3A        | rs7134375  | NA |  | NA | 24 |
| PPP1R3B      | rs9987289  | NA |  | NA | 24 |
| SBNO1        | rs4759375  | NA |  | NA | 24 |
| SLC39A8      | rs13107325 | NA |  | NA | 24 |
| TRPS1        | rs2293889  | NA |  | NA | 24 |
| TTC39B       | rs471364   | NA |  | NA | 22 |
| TTC39B       | rs643531   | NA |  | NA | 24 |
| UBASH3B      | rs7115089  | NA |  | NA | 24 |
| UBE2L3       | rs181362   | NA |  | NA | 24 |

|                                                                                              |           |    |  |    |    |    |    |    |    |    |    |    |    |    |    |
|----------------------------------------------------------------------------------------------|-----------|----|--|----|----|----|----|----|----|----|----|----|----|----|----|
| ZNF648                                                                                       | rs1689800 | NA |  | NA | 24 |
| R <sup>2</sup> , correlation coefficient; P, P-value; N, Sample size; D, Direction of effect |           |    |  |    |    |    |    |    |    |    |    |    |    |    |    |

## **Supplemental Figure Legends**

**Supplemental Figure 1.** Inference of genetic race using multi-dimensional scaling approach. Analysis is conducted on 5051 samples genotyped using the IBC array.

Supplemental Figure 1.

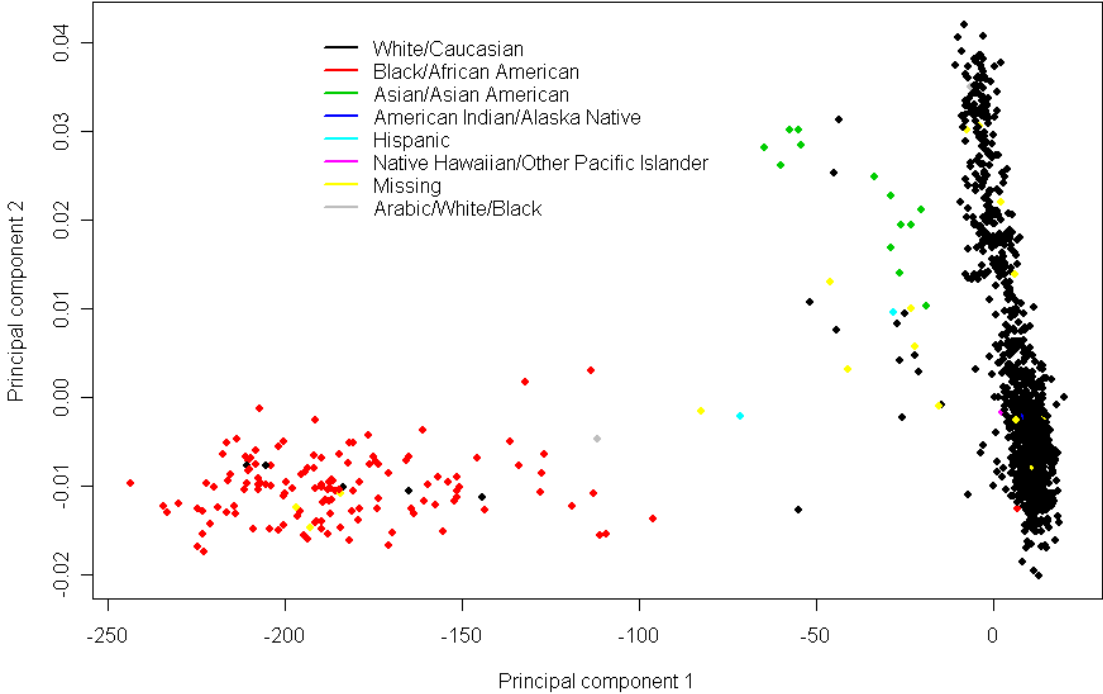

Supplement: NIHMS280051-supplement-1.pdf [file NIHMS280051-supplement-1.pdf]
